# Supplementary material for: Simultaneous enhancement of fluorescence and solubility by N-alkylation and functionalization of 2-(2-thienyl)imidazo[4,5-f][1,10]-phenanthroline with heterocyclic bridges
Source: Royal Society of Chemistry journal article supplement (doi:10.1039/c4ra12627k), 2014-12-01
Supplement: c4ra12627k1.pdf [file c4ra12627k1.pdf]

## Simultaneous enhancement of fluorescence and solubility by *N*-alkylation and functionalization of 2-(2-thienyl)imidazo[4,5-*f*][1,10]-phenanthroline with heterocyclic bridges

Yu-Xin Peng, Na Wang, Yuan Dai, Bin Hu, Bin-Bin Ma and Wei Huang\*

*State Key Laboratory of Coordination Chemistry, Nanjing National Laboratory of Microstructures, School of Chemistry and Chemical Engineering, Nanjing University, Nanjing 210093, P. R. China*

*E-mail: [whuang@nju.edu.cn](mailto:whuang@nju.edu.cn)*

| Contents                                                                              | Page Number |
|---------------------------------------------------------------------------------------|-------------|
| 1. NMR, EI-TOF-MS and ESI-MS spectra-----                                             | S3-S43      |
| <sup>1</sup> H, <sup>13</sup> C NMR and EI-TOF-MS spectra of compound <b>1</b> -----  | S3-S5       |
| <sup>1</sup> H, <sup>13</sup> C NMR and EI-TOF-MS spectra of compound <b>2</b> -----  | S6-S8       |
| <sup>1</sup> H, <sup>13</sup> C NMR and ESI-MS spectra of compound <b>3</b> -----     | S9-S11      |
| <sup>1</sup> H, <sup>13</sup> C NMR and EI-TOF-MS spectra of compound <b>4</b> -----  | S12-S14     |
| <sup>1</sup> H, <sup>13</sup> C NMR and EI-TOF-MS spectra of compound <b>5</b> -----  | S15-S17     |
| <sup>1</sup> H, <sup>13</sup> C NMR and EI-TOF-MS spectra of compound <b>6</b> -----  | S18-S20     |
| <sup>1</sup> H, <sup>13</sup> C NMR and EI-TOF-MS spectra of compound <b>7</b> -----  | S21-S23     |
| <sup>1</sup> H, <sup>13</sup> C NMR and EI-TOF-MS spectra of compound <b>8</b> -----  | S24-S26     |
| <sup>1</sup> H, <sup>13</sup> C NMR and EI-TOF-MS spectra of compound <b>9</b> -----  | S27-S29     |
| <sup>1</sup> H, <sup>13</sup> C NMR and EI-TOF-MS spectra of compound <b>10</b> ----- | S30-S32     |
| <sup>1</sup> H, <sup>13</sup> C NMR and EI-TOF-MS spectra of compound <b>11</b> ----- | S33-S35     |
| <sup>1</sup> H, <sup>13</sup> C NMR and EI-TOF-MS spectra of compound <b>12</b> ----- | S36-S38     |
| <sup>1</sup> H, <sup>13</sup> C NMR and EI-TOF-MS spectra of compound <b>13</b> ----- | S39-S41     |
| ESI-MS spectrum of compound <b>BM3</b> -----                                          | S42         |
| ESI-MS spectrum of compound <b>BM4</b> -----                                          | S43         |
| 2. X-ray crystallographic data of twelve compounds-----                               | S44-S65     |

|                                                                                                                               |         |
|-------------------------------------------------------------------------------------------------------------------------------|---------|
| Selected bond lengths and bond angles-----                                                                                    | S44-S52 |
| ORTEP diagrams of <b>3</b> ·CHCl <sub>3</sub> , <b>4</b> , <b>5</b> ·CHCl <sub>3</sub> and <b>10</b> ·CHCl <sub>3</sub> ----- | S53     |
| Perspective view of the packing structures-----                                                                               | S54-S65 |

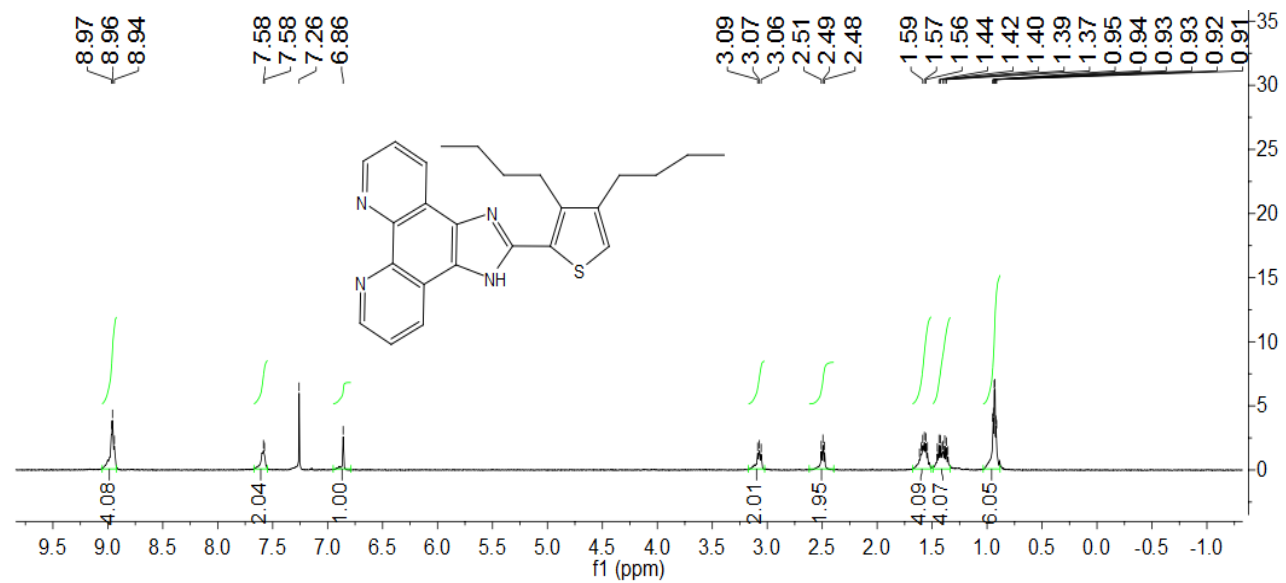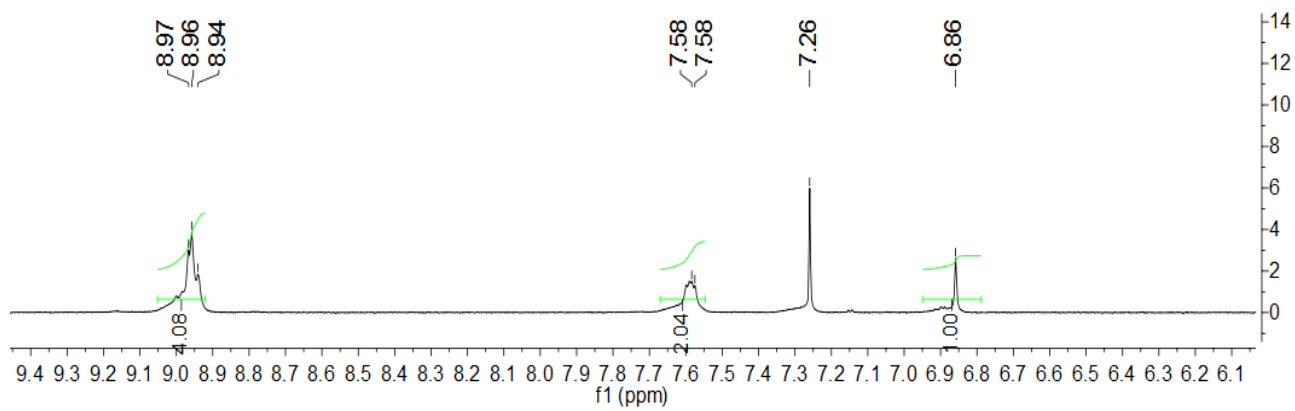

**a**

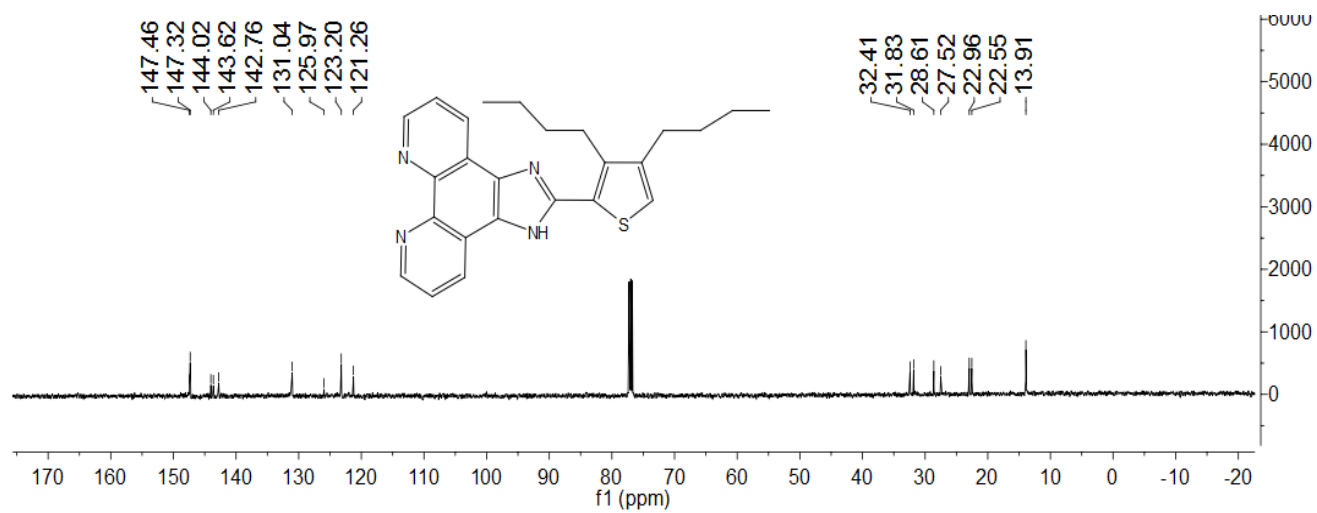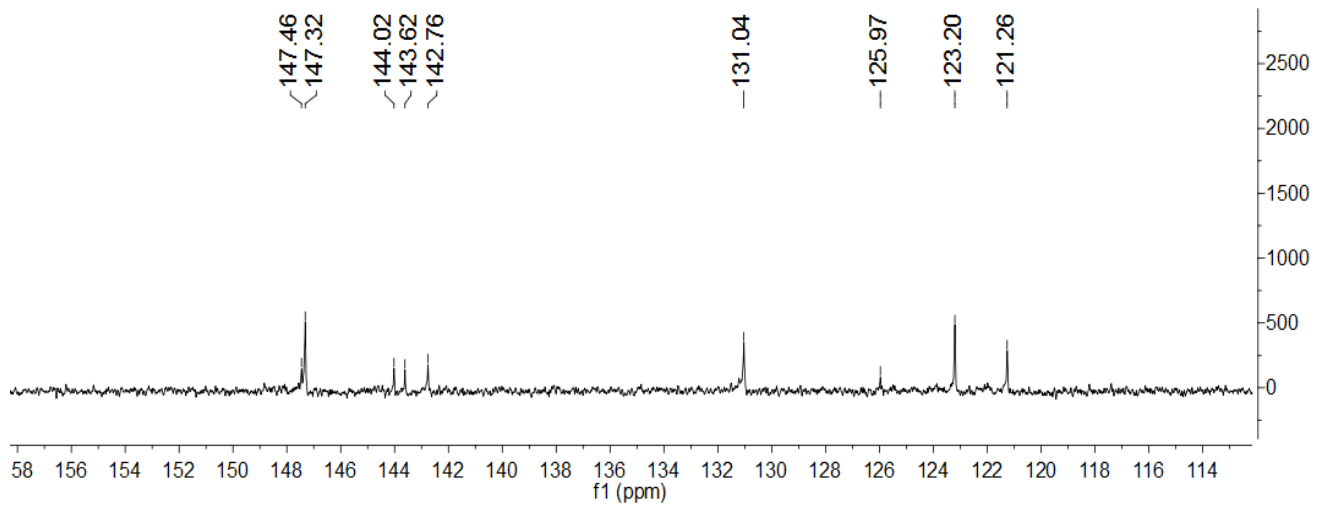

**b**

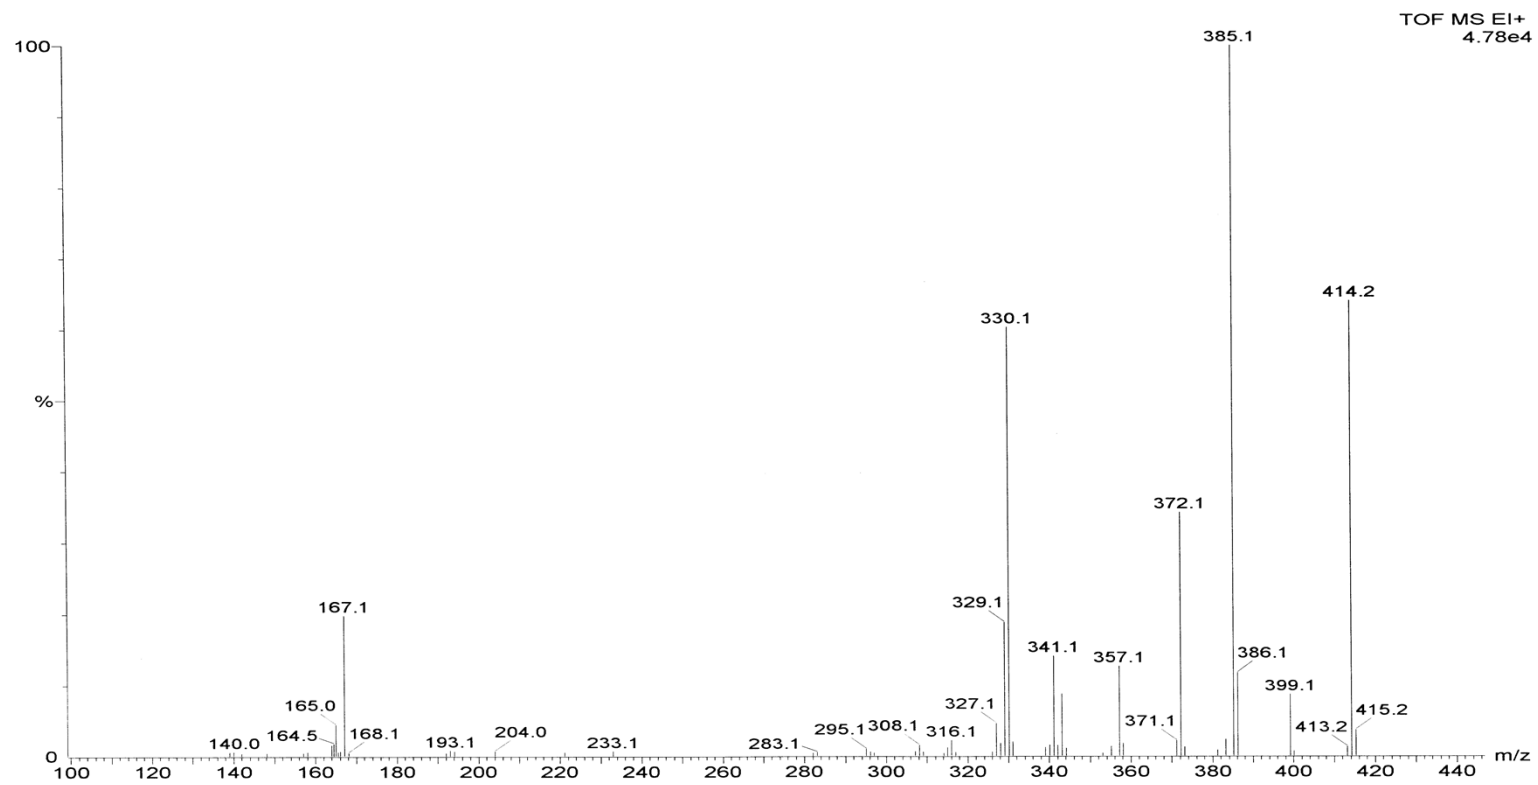

**c**

**Fig. S11.**  $^1\text{H}$  (a),  $^{13}\text{C}$  NMR (b) and EI-TOF-MS (c) spectra of compound **1**.

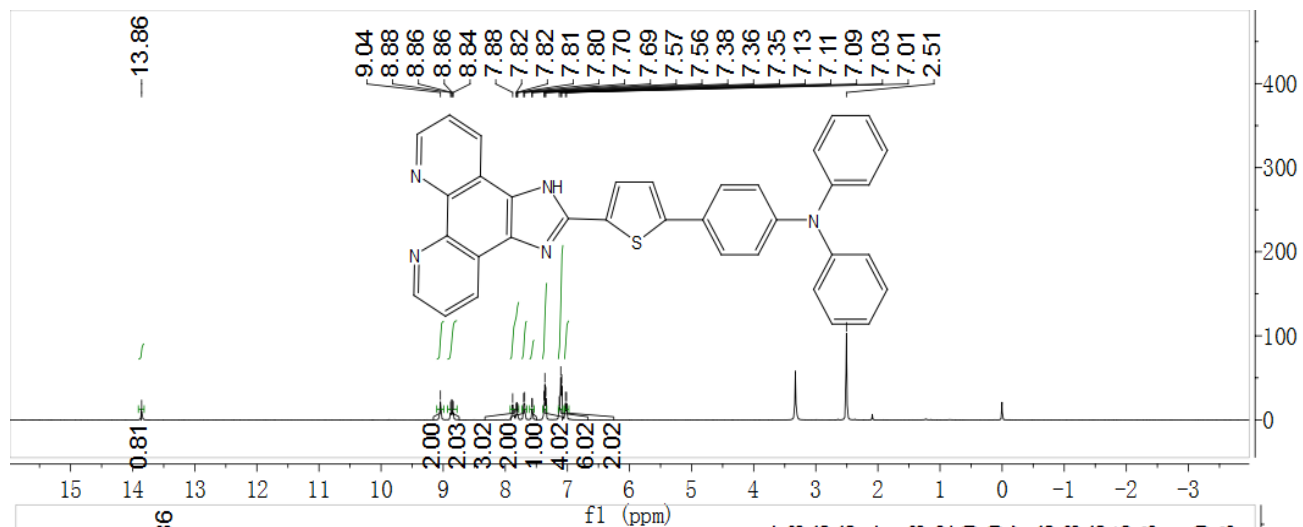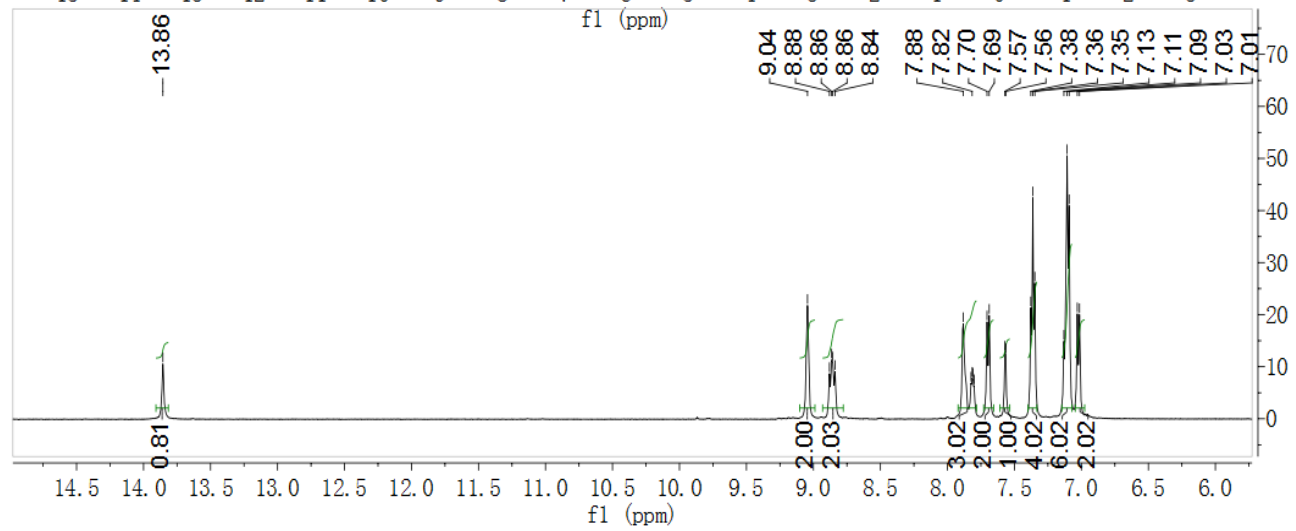

**a**

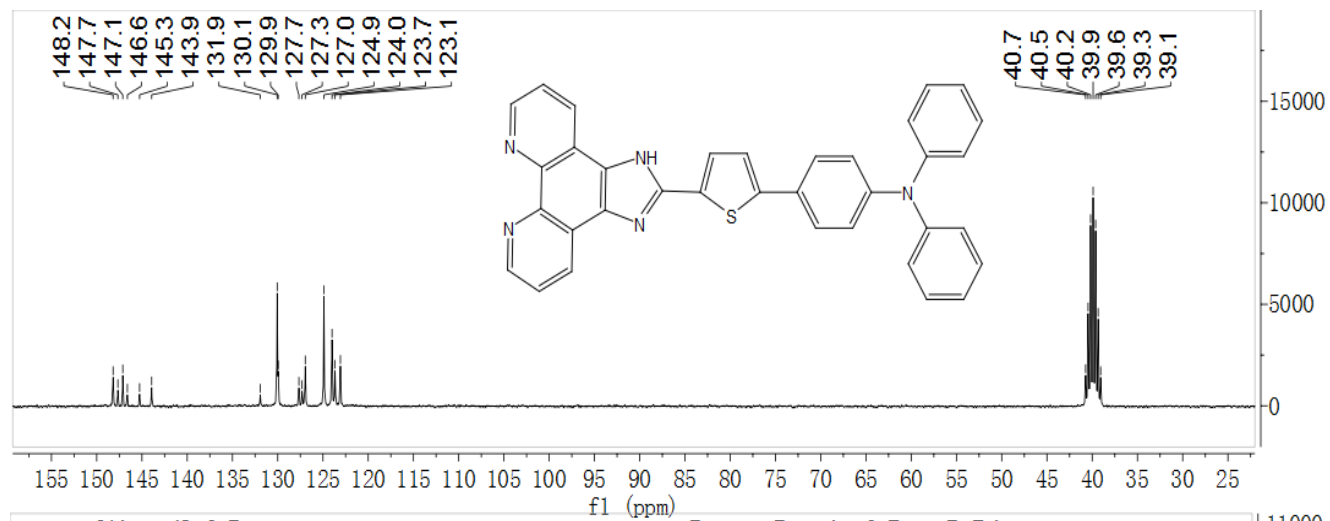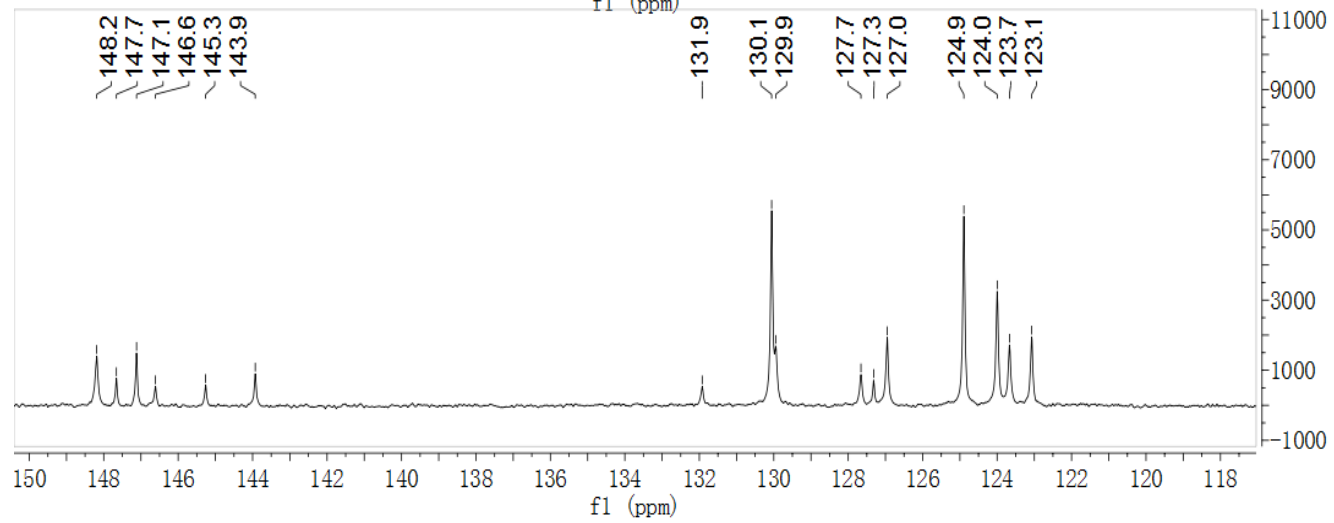

**b**

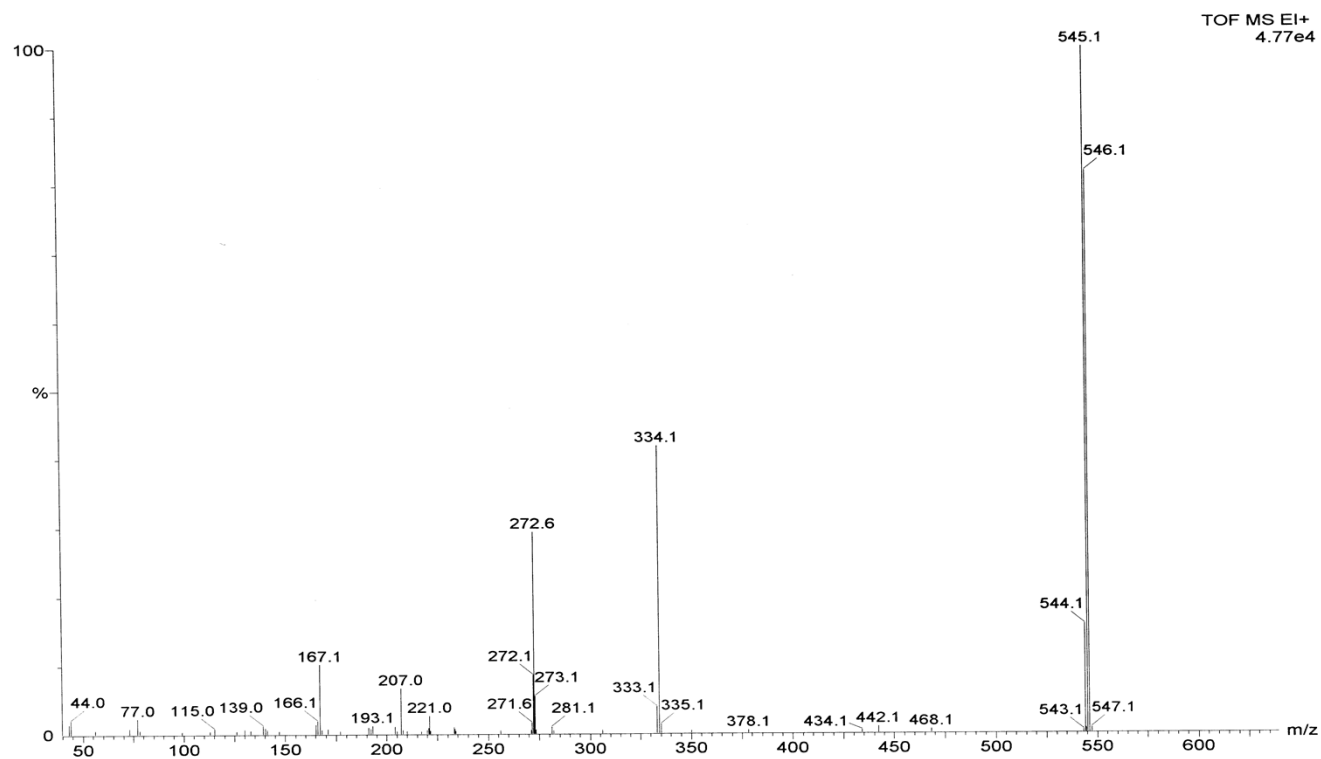

**c**

**Fig. S12.**  $^1\text{H}$  (a),  $^{13}\text{C}$  NMR (b) and EI-TOF-MS (c) spectra of compound **2**.



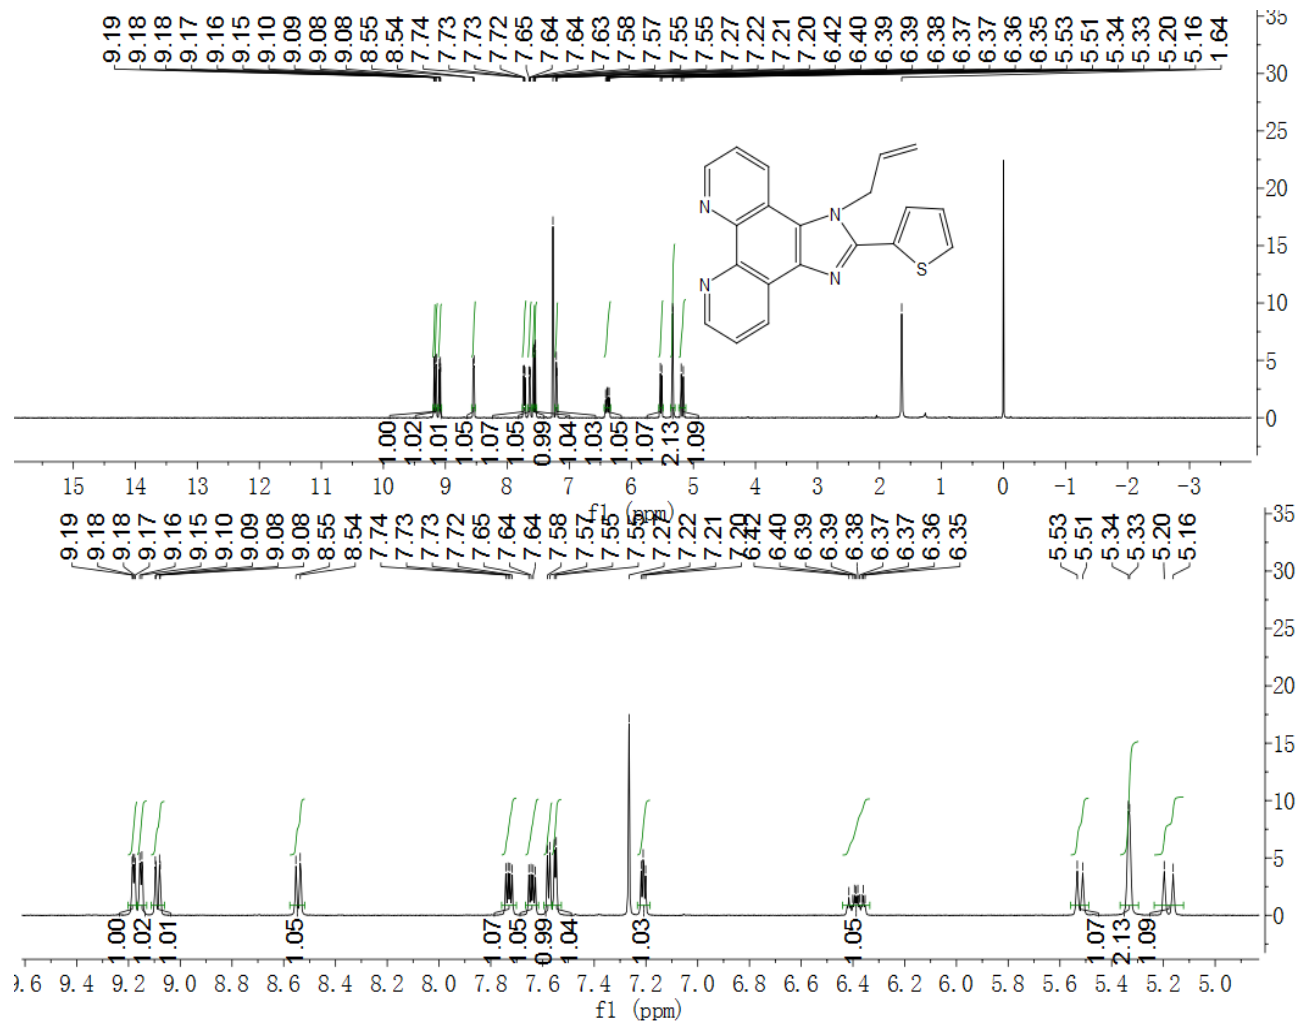

a

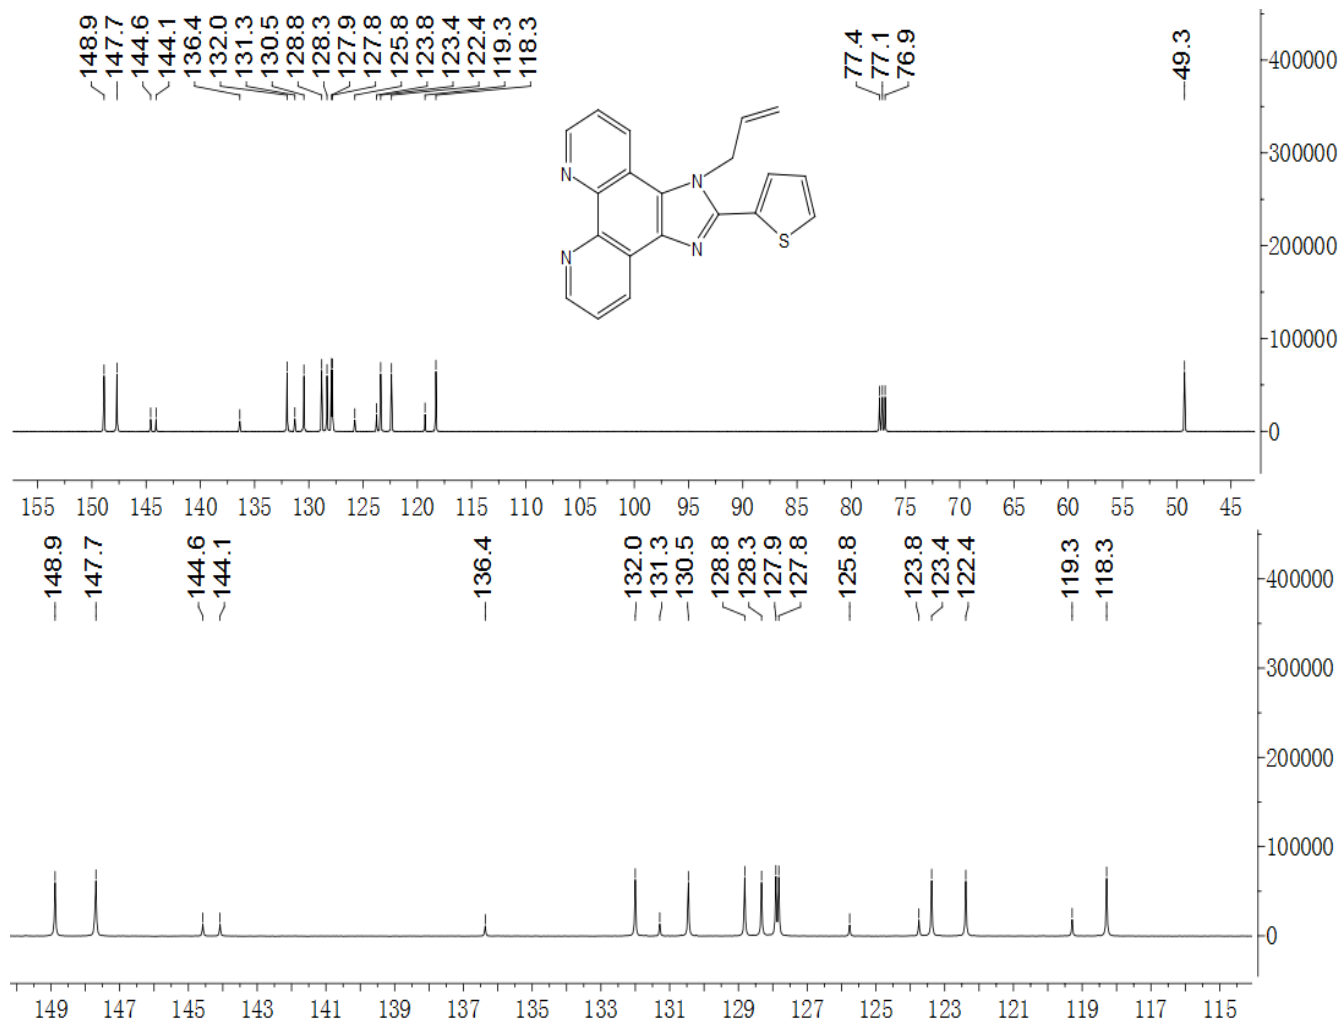

**a**

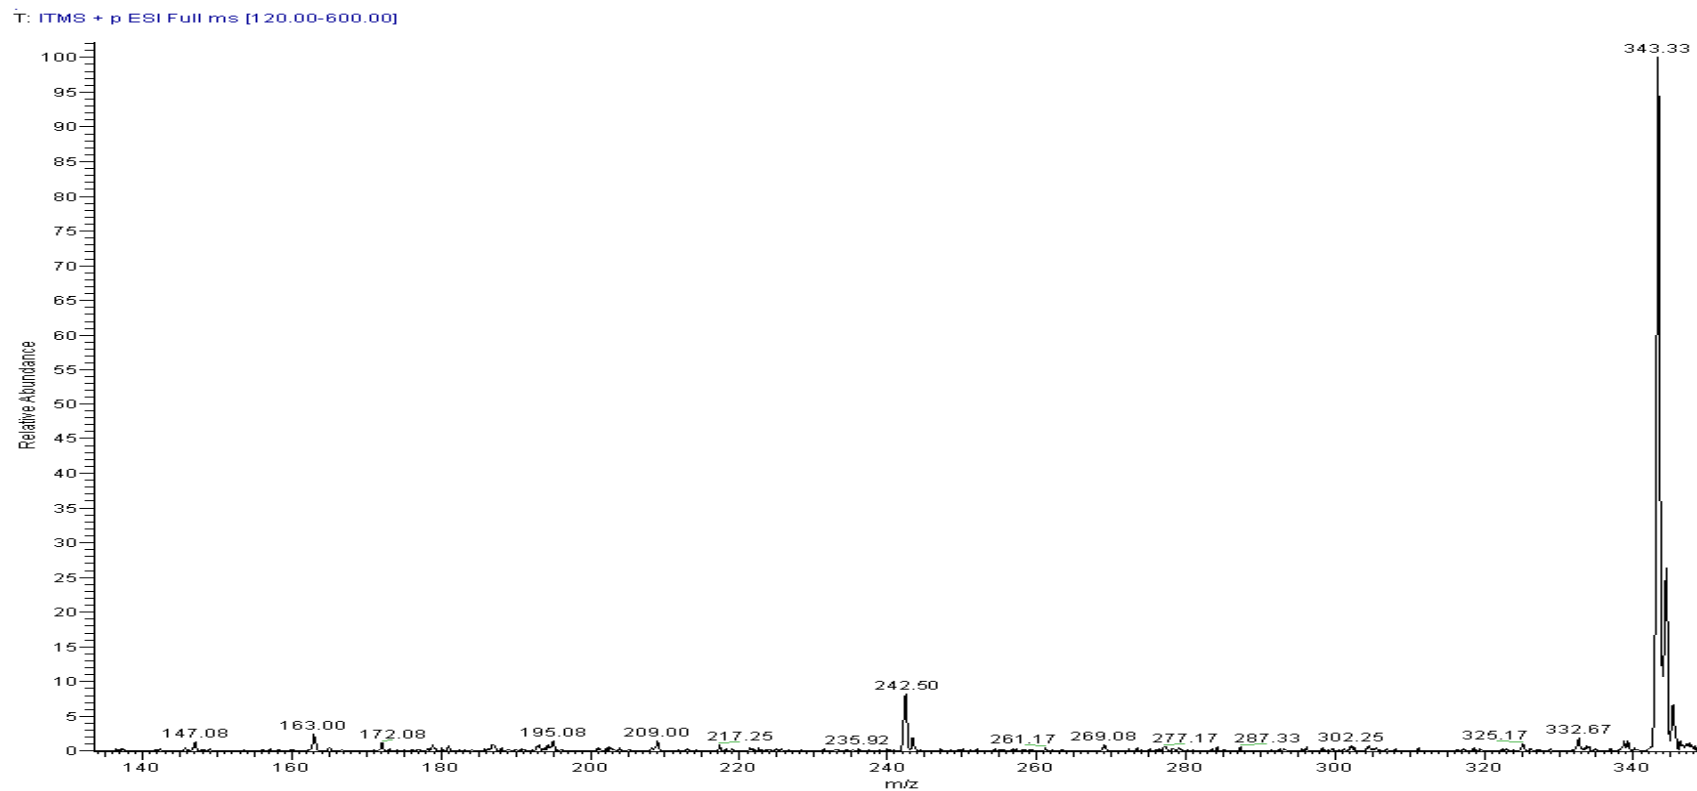

**c**

**Fig. S13.**  $^1\text{H}$  (a),  $^{13}\text{C}$  NMR (b) and EI-TOF-MS (c) spectra of compound **3**.

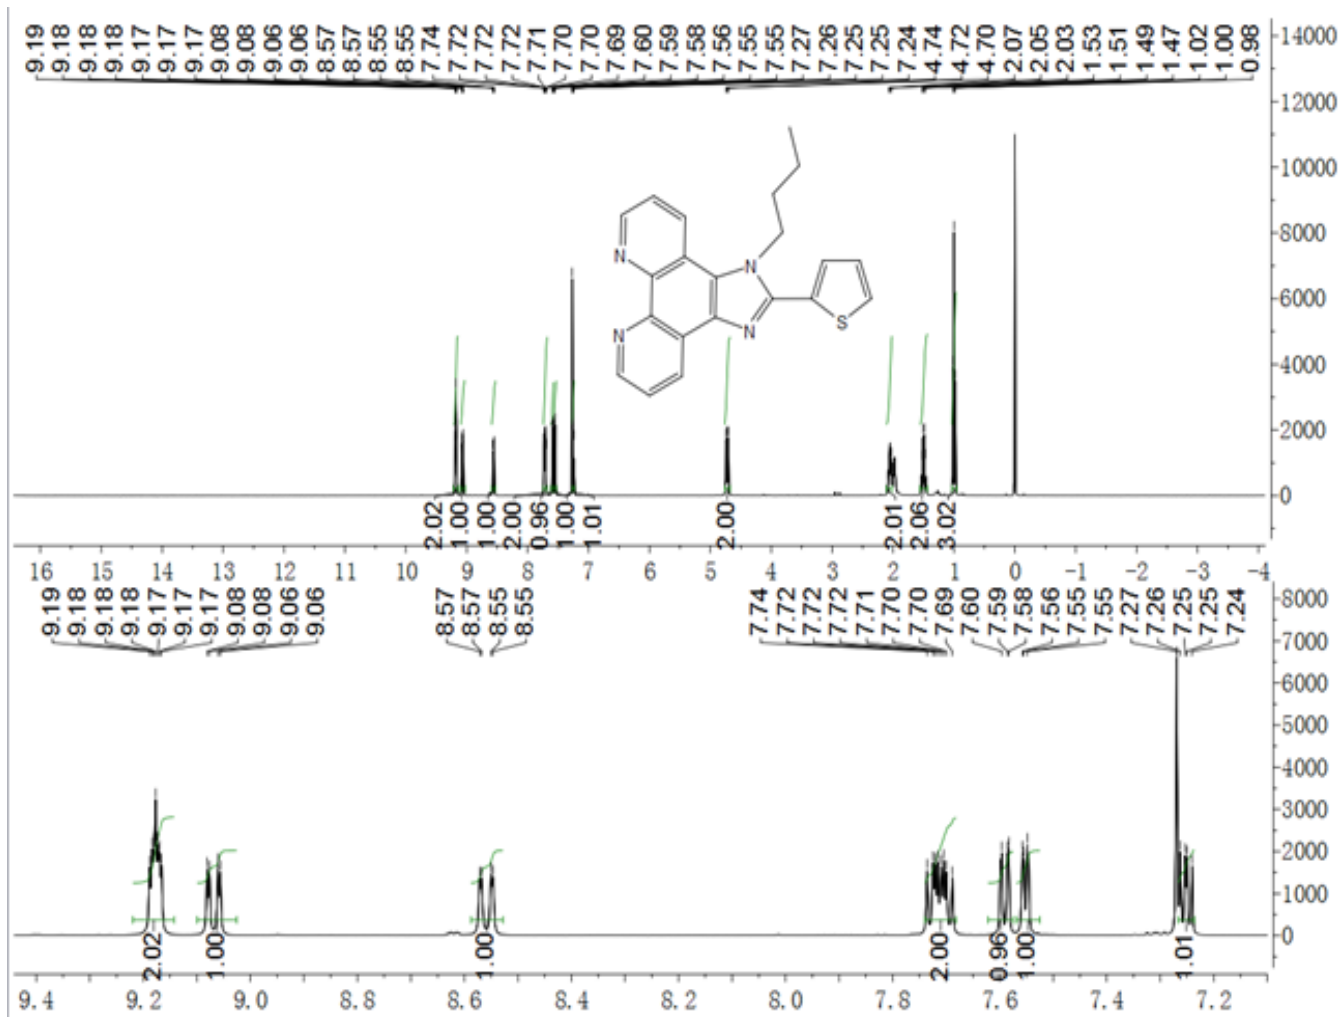

a

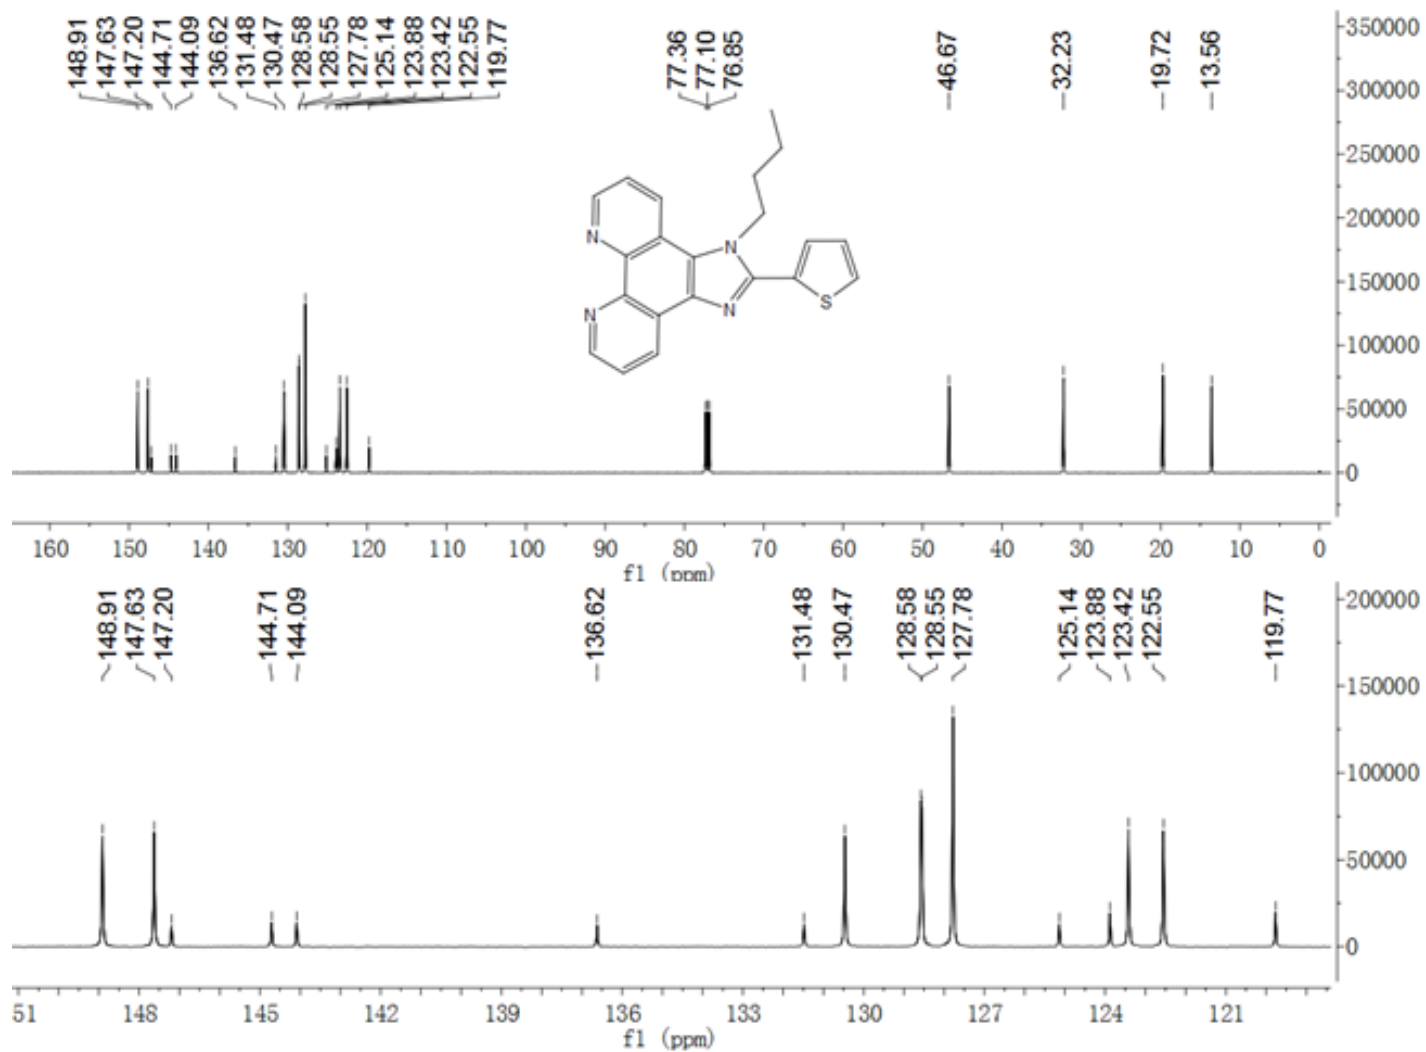

**b**

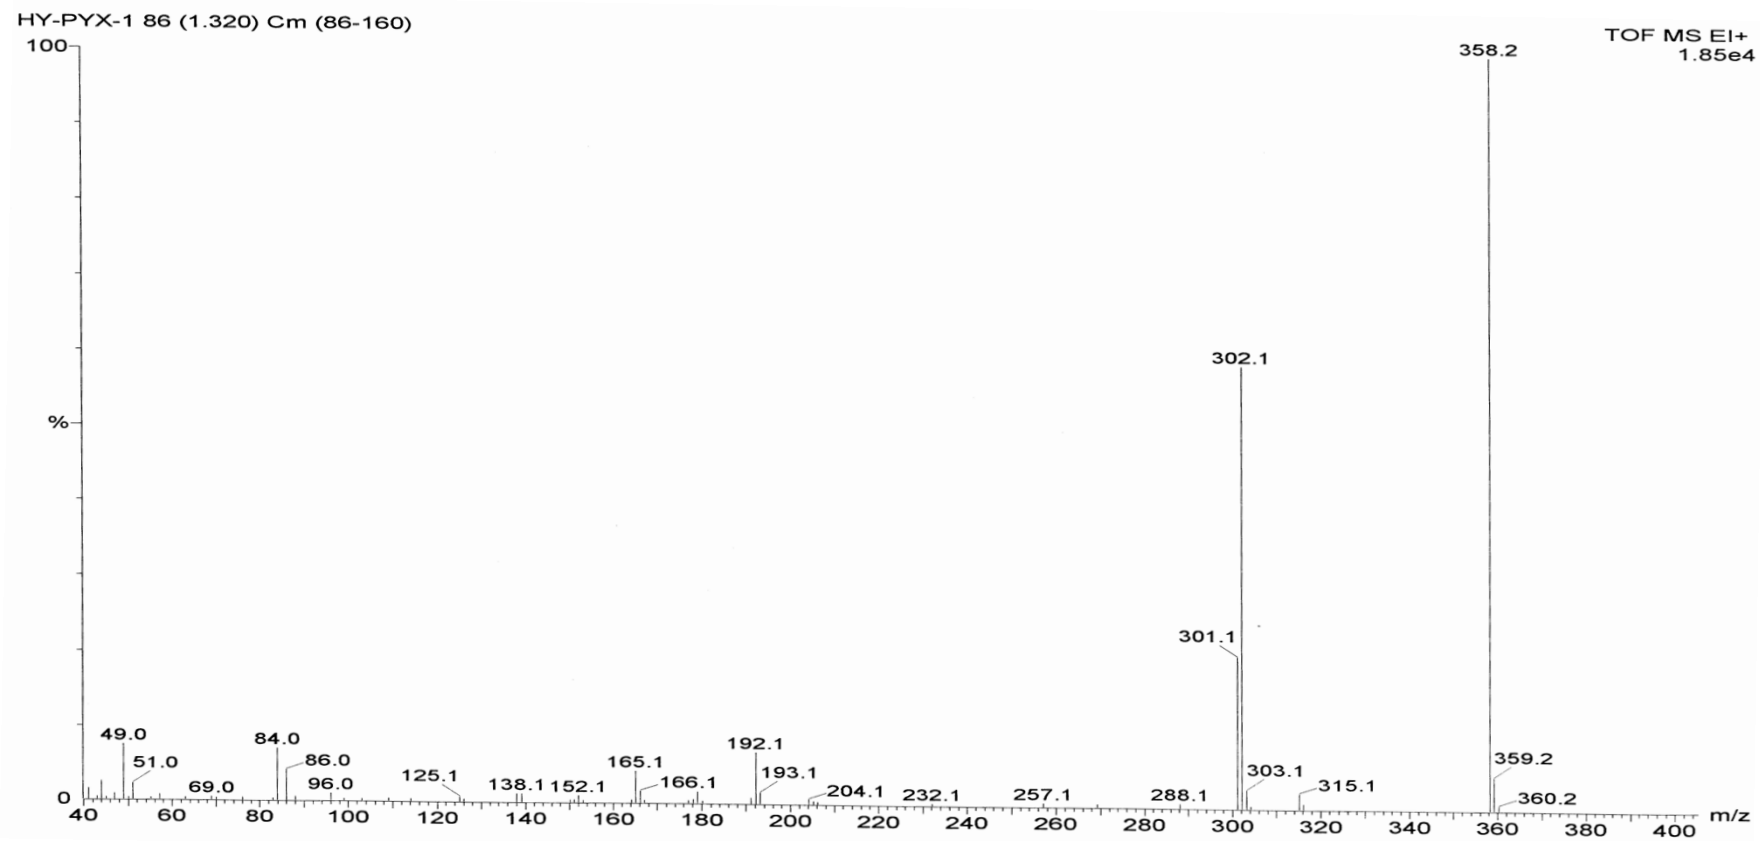

c

**Fig. S14.**  $^1\text{H}$  (a),  $^{13}\text{C}$  NMR (b) and EI-TOF-MS (c) spectra of compound 4.

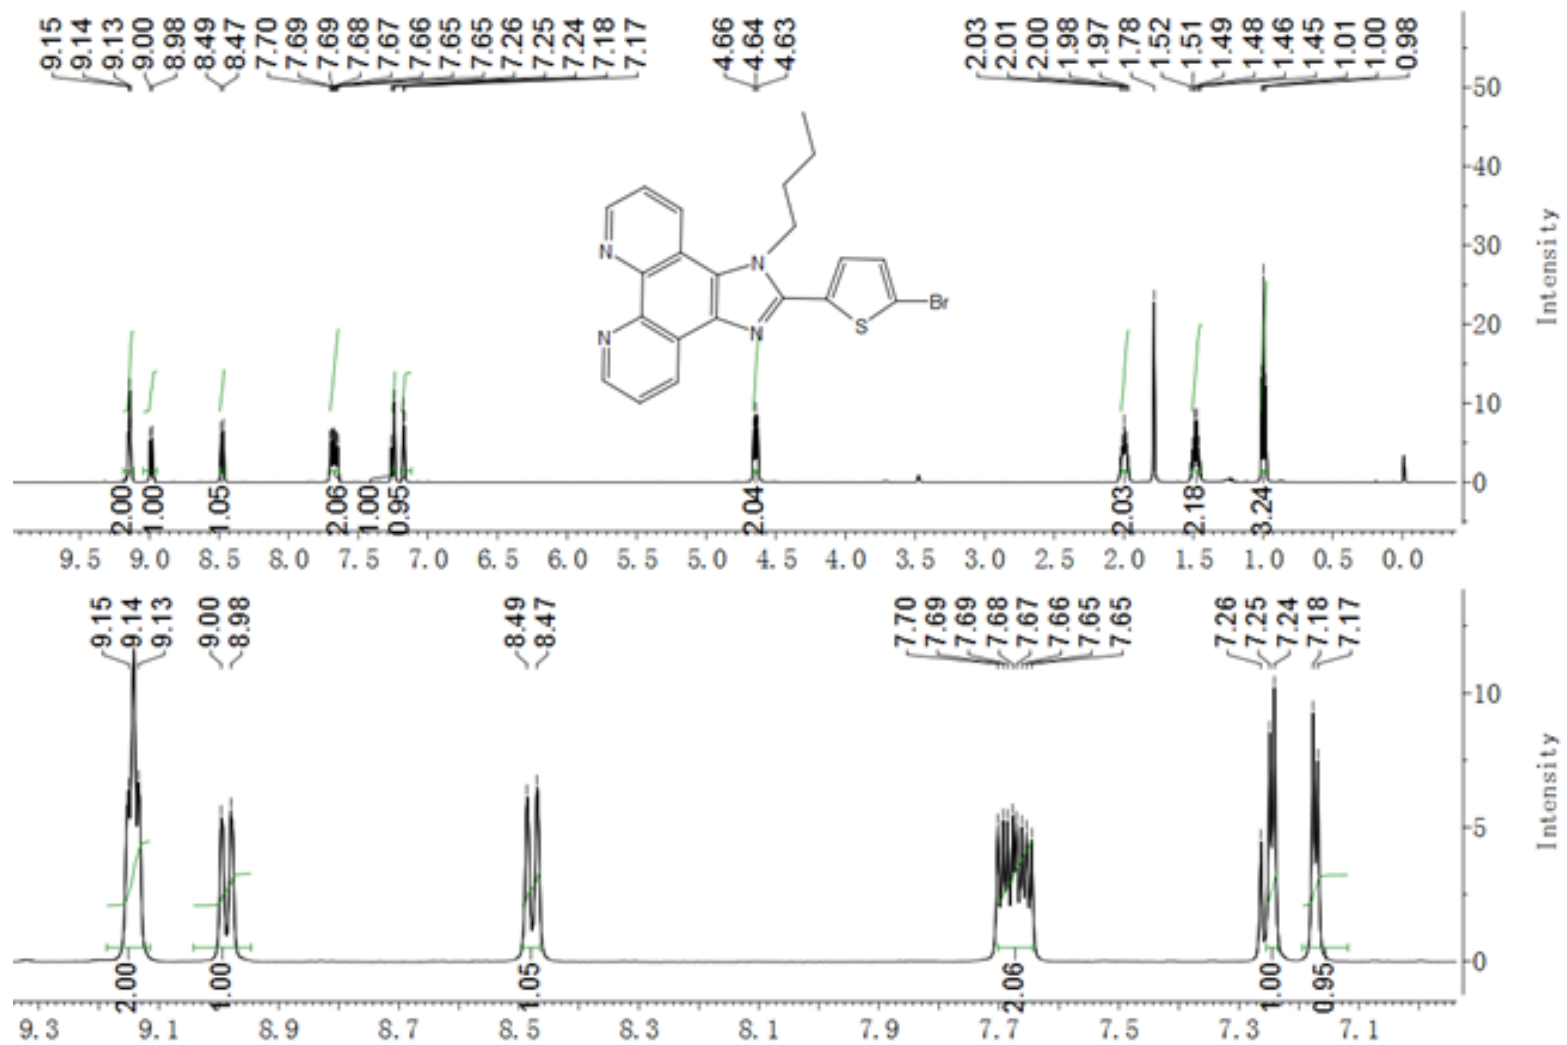

a

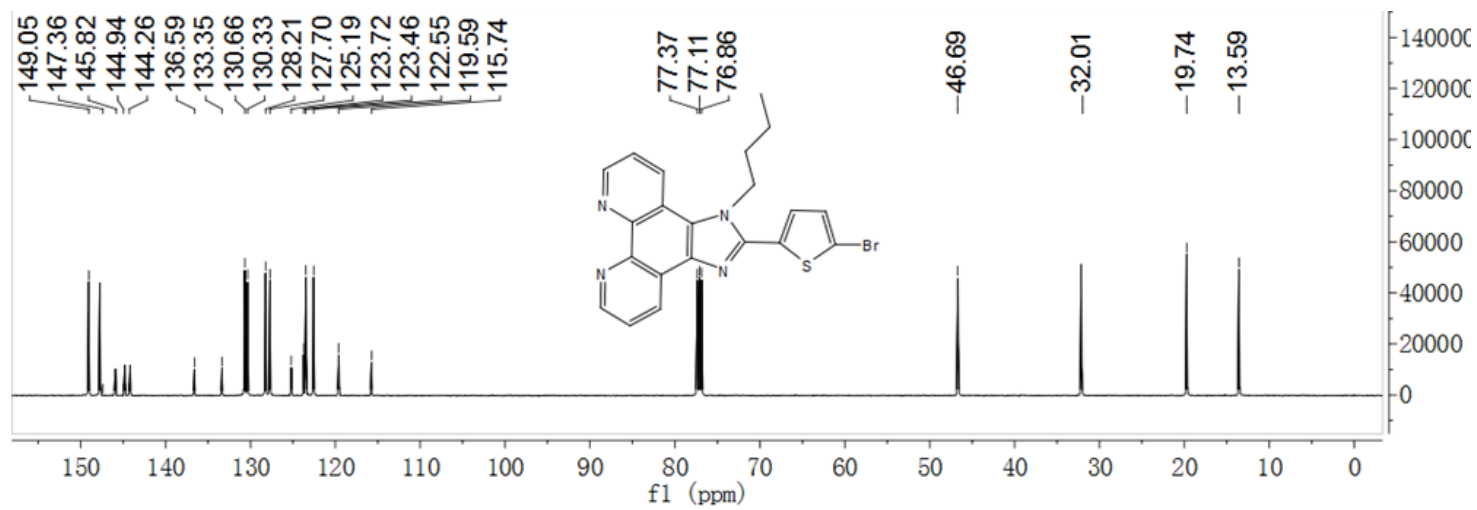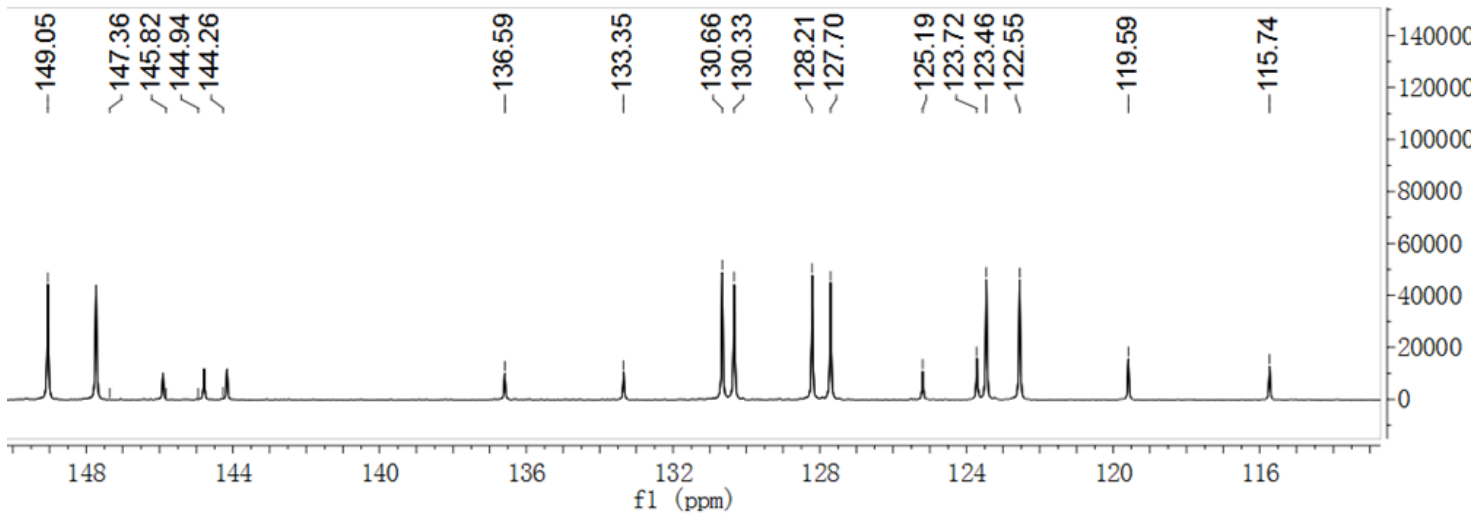

**b**



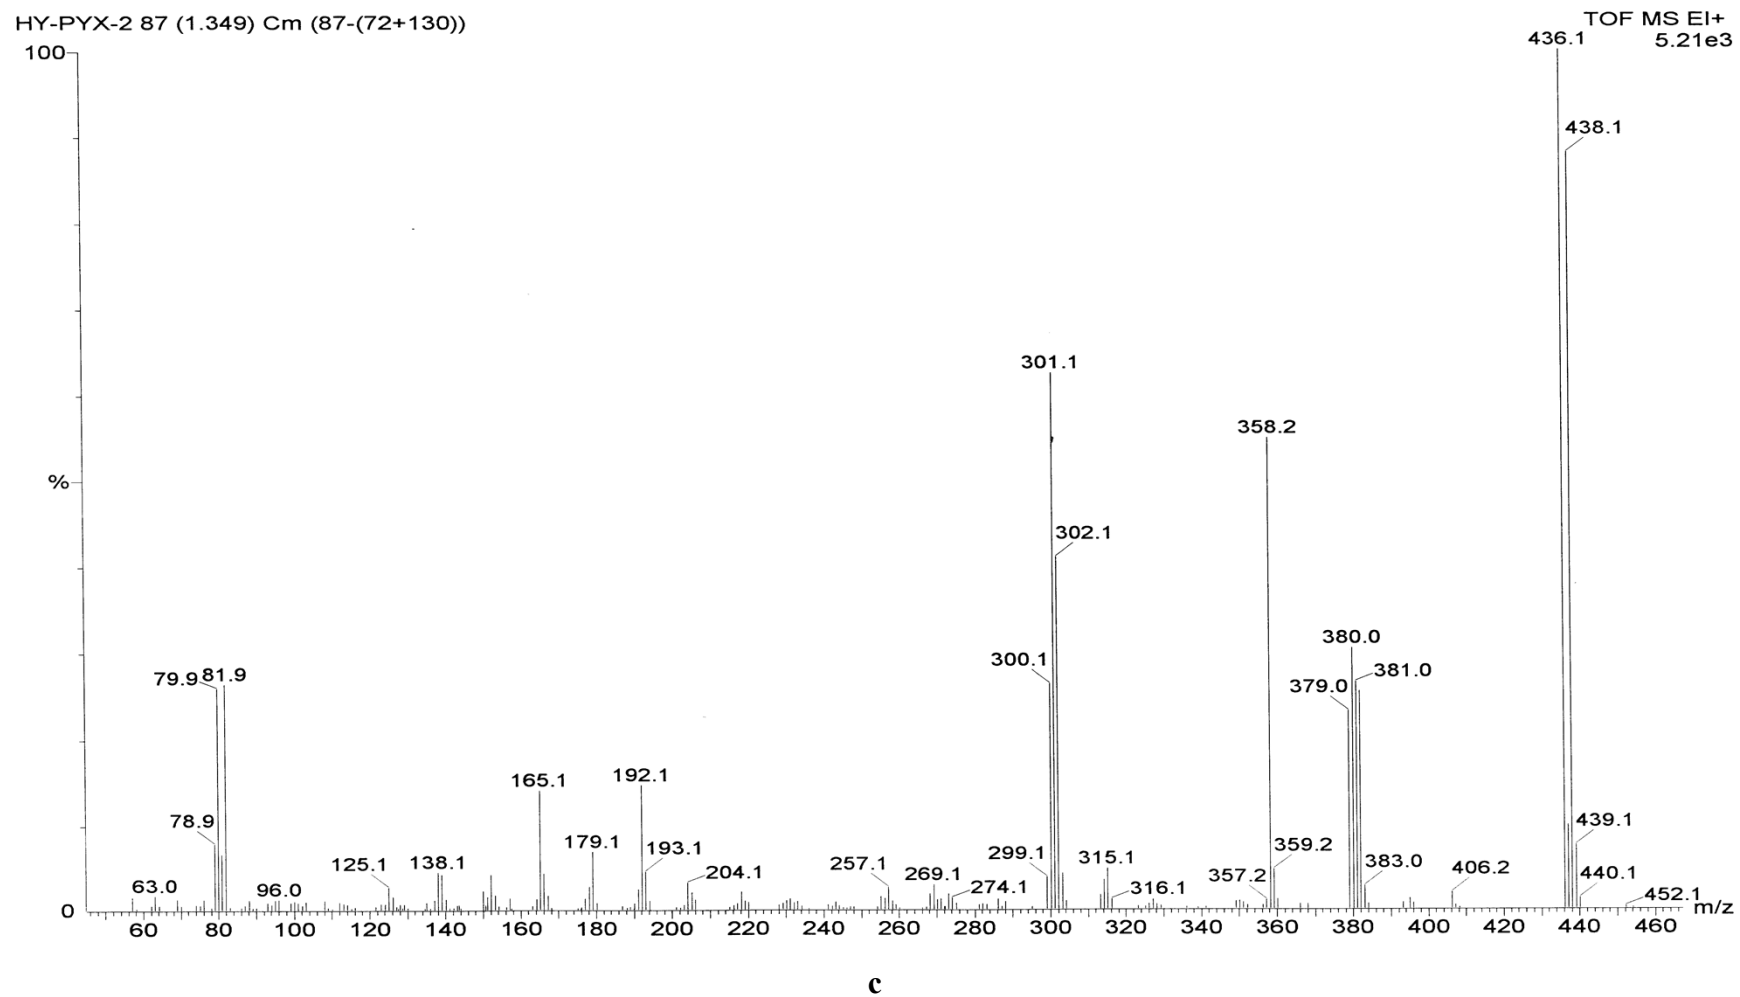

**Fig. S15.**  $^1\text{H}$  (a),  $^{13}\text{C}$  NMR (b) and EI-TOF-MS (c) spectra of compound **5**.

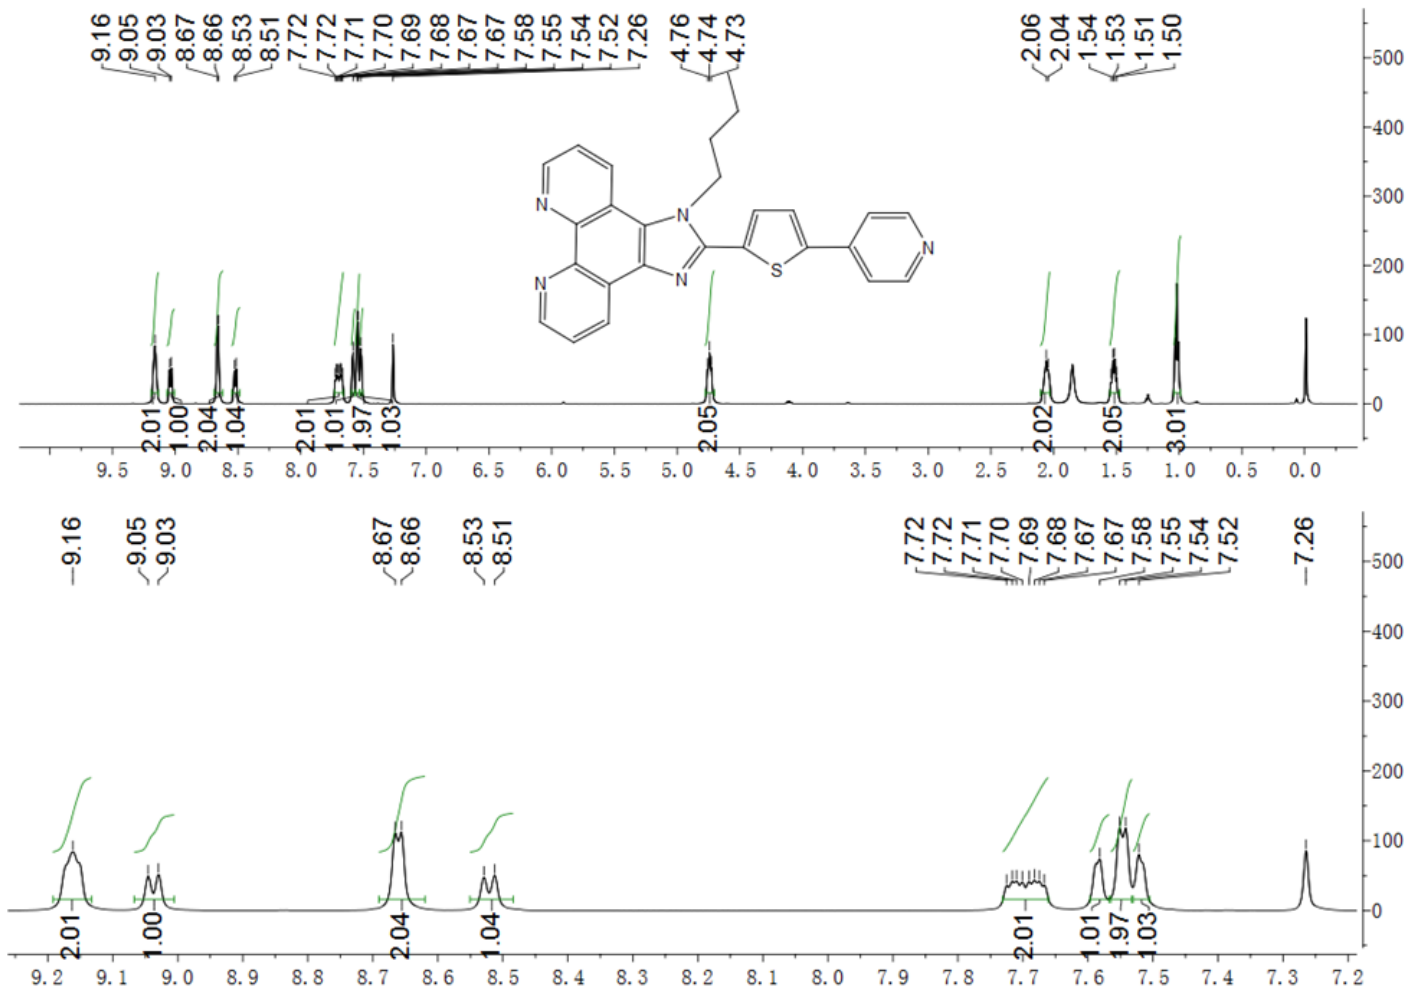

a

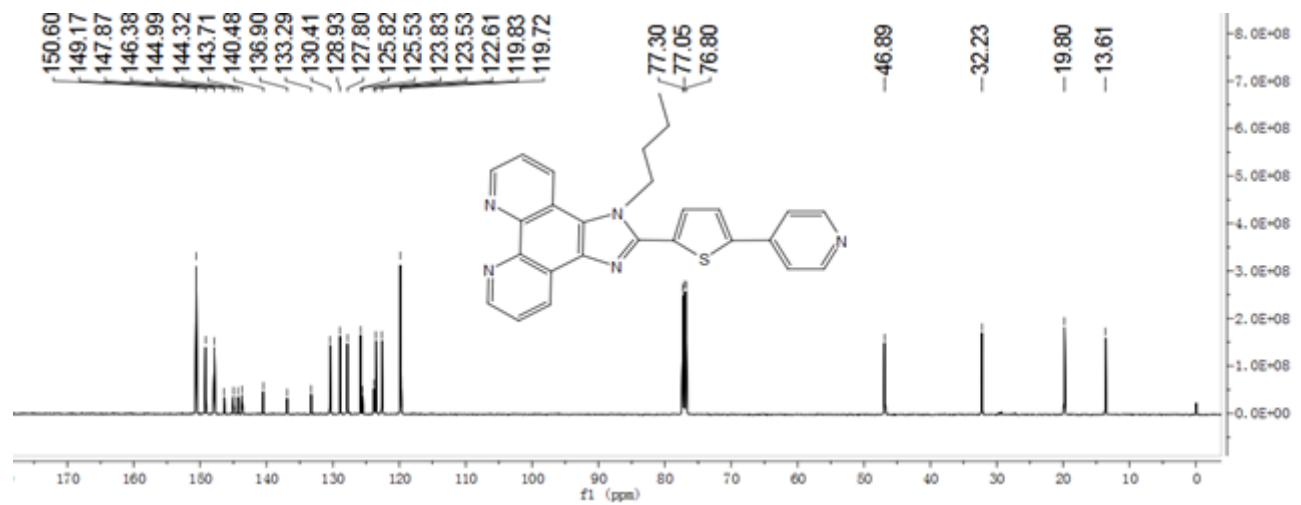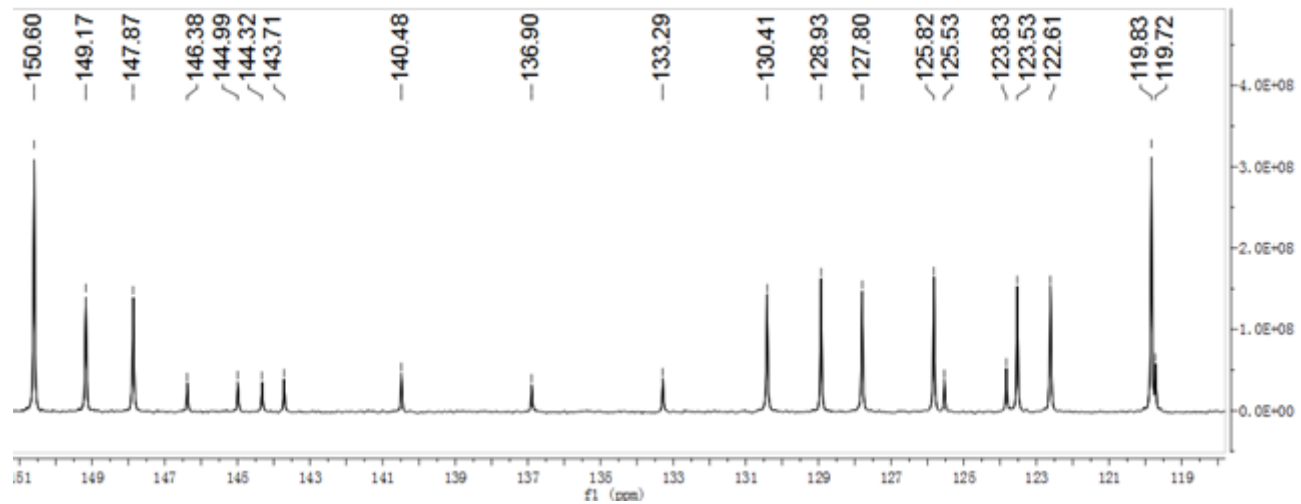

**b**

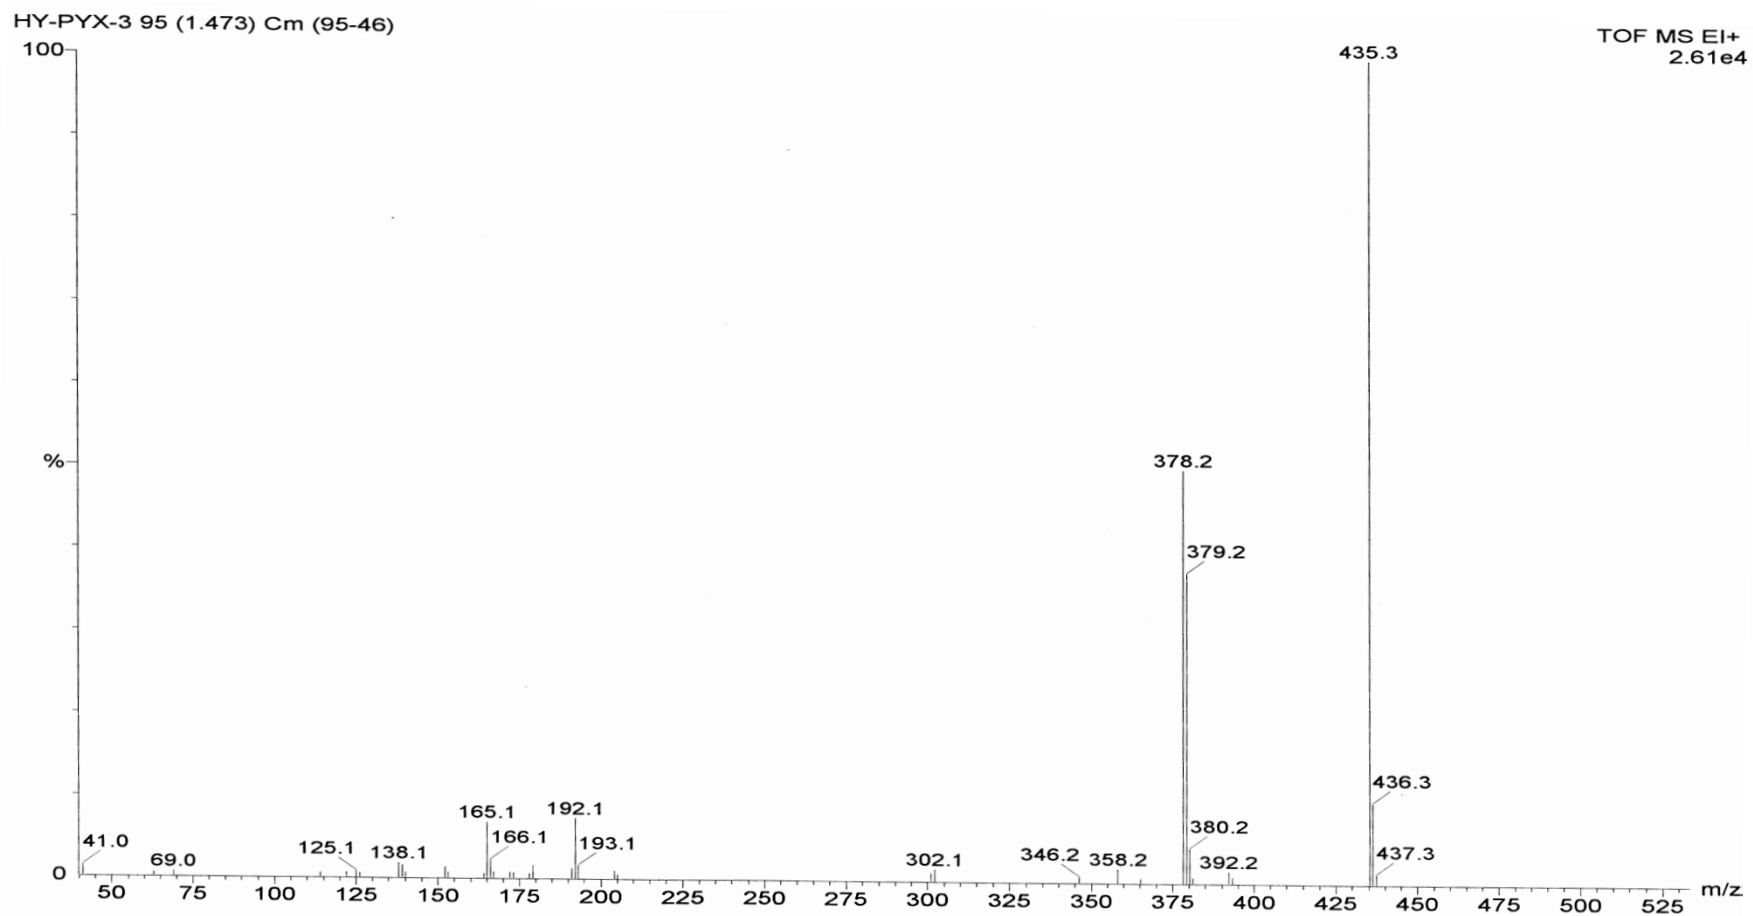

**c**

**Fig. S16.**  $^1\text{H}$  (a),  $^{13}\text{C}$  NMR (b) and EI-TOF-MS (c) spectra of compound **6**.

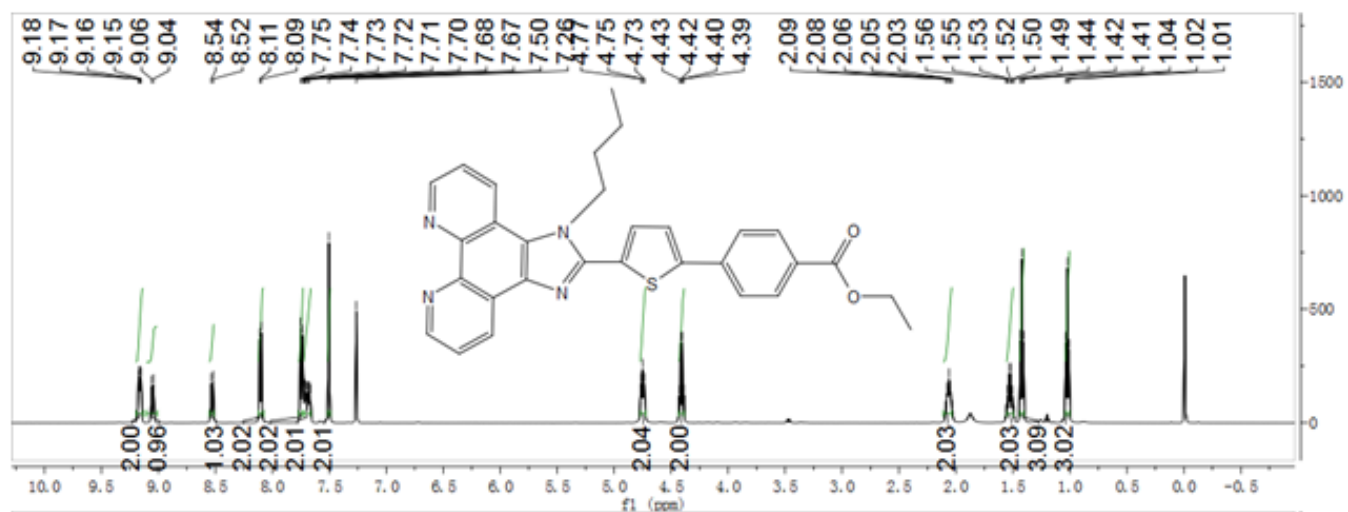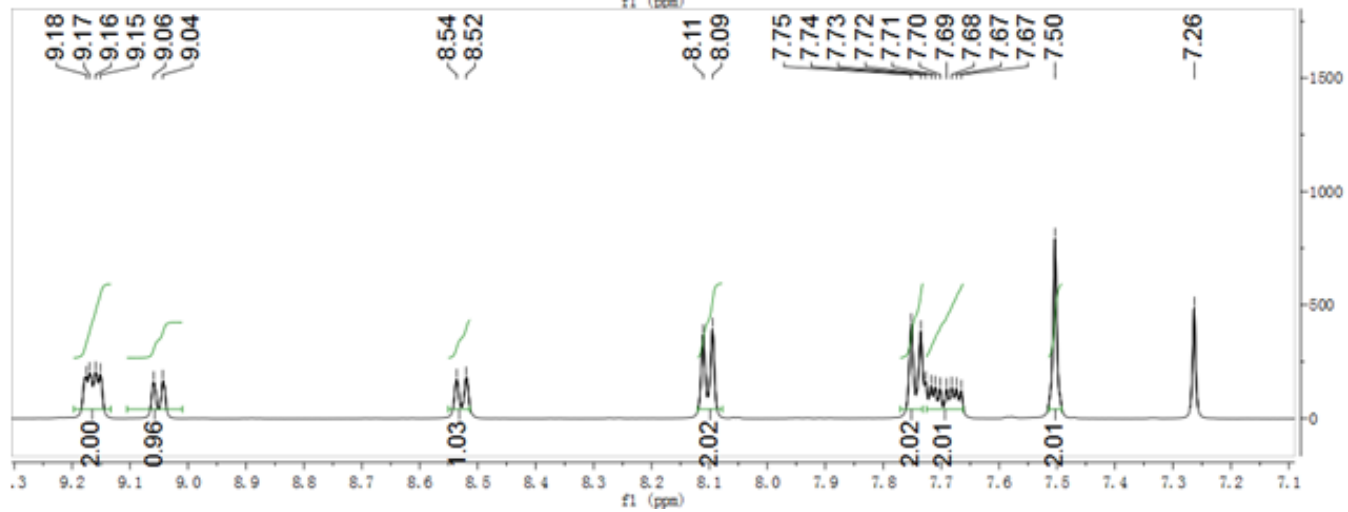

a

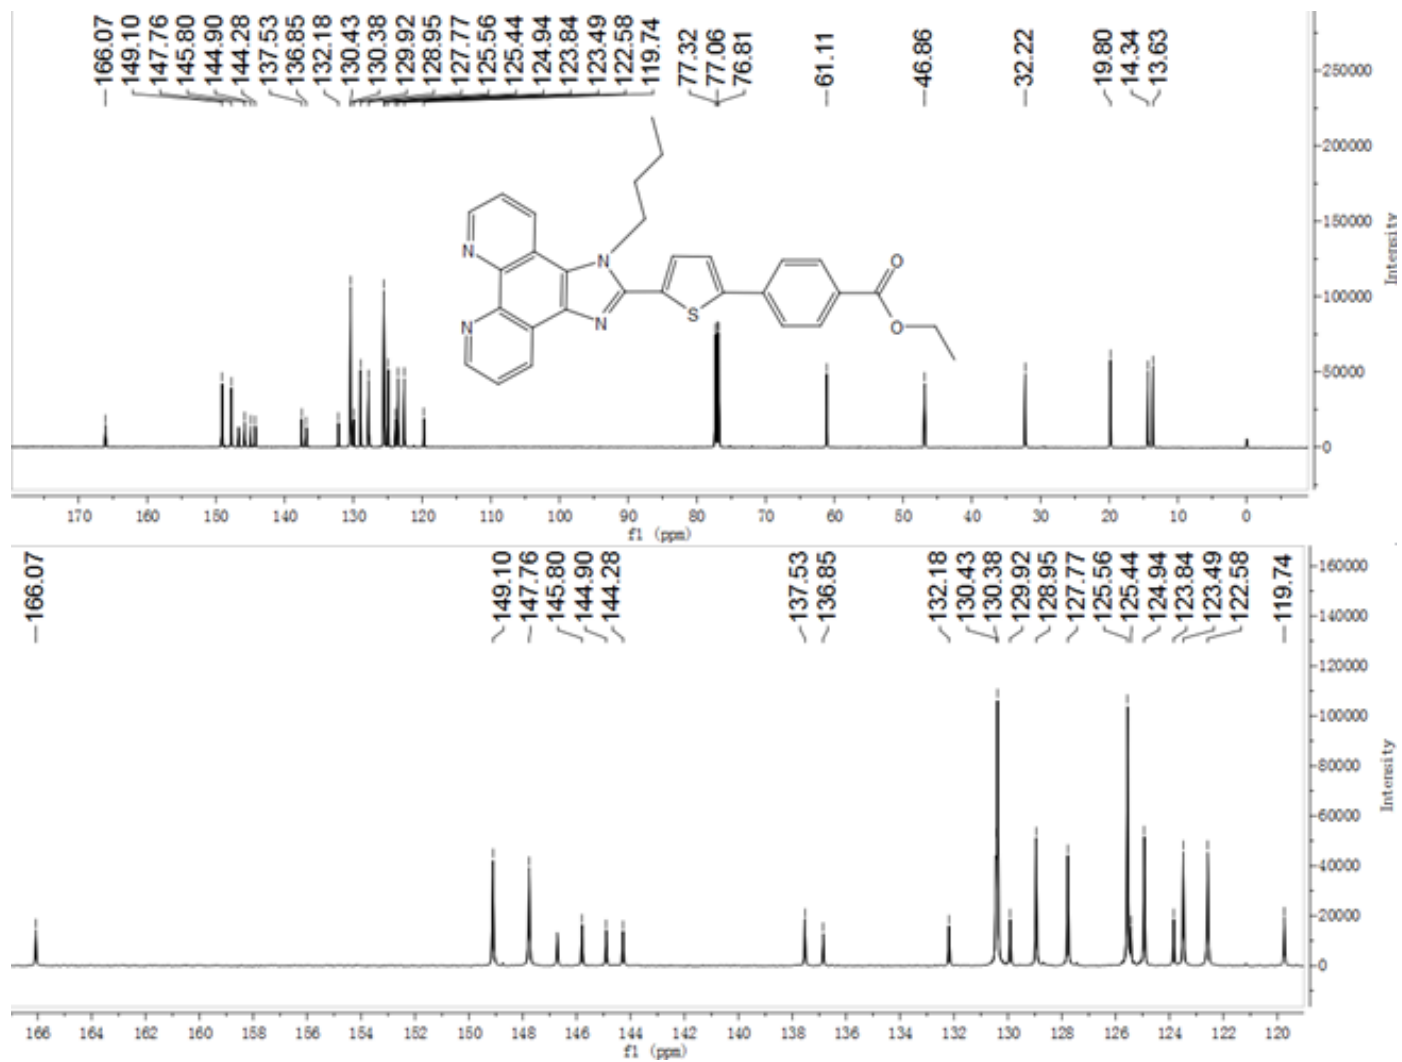

**b**

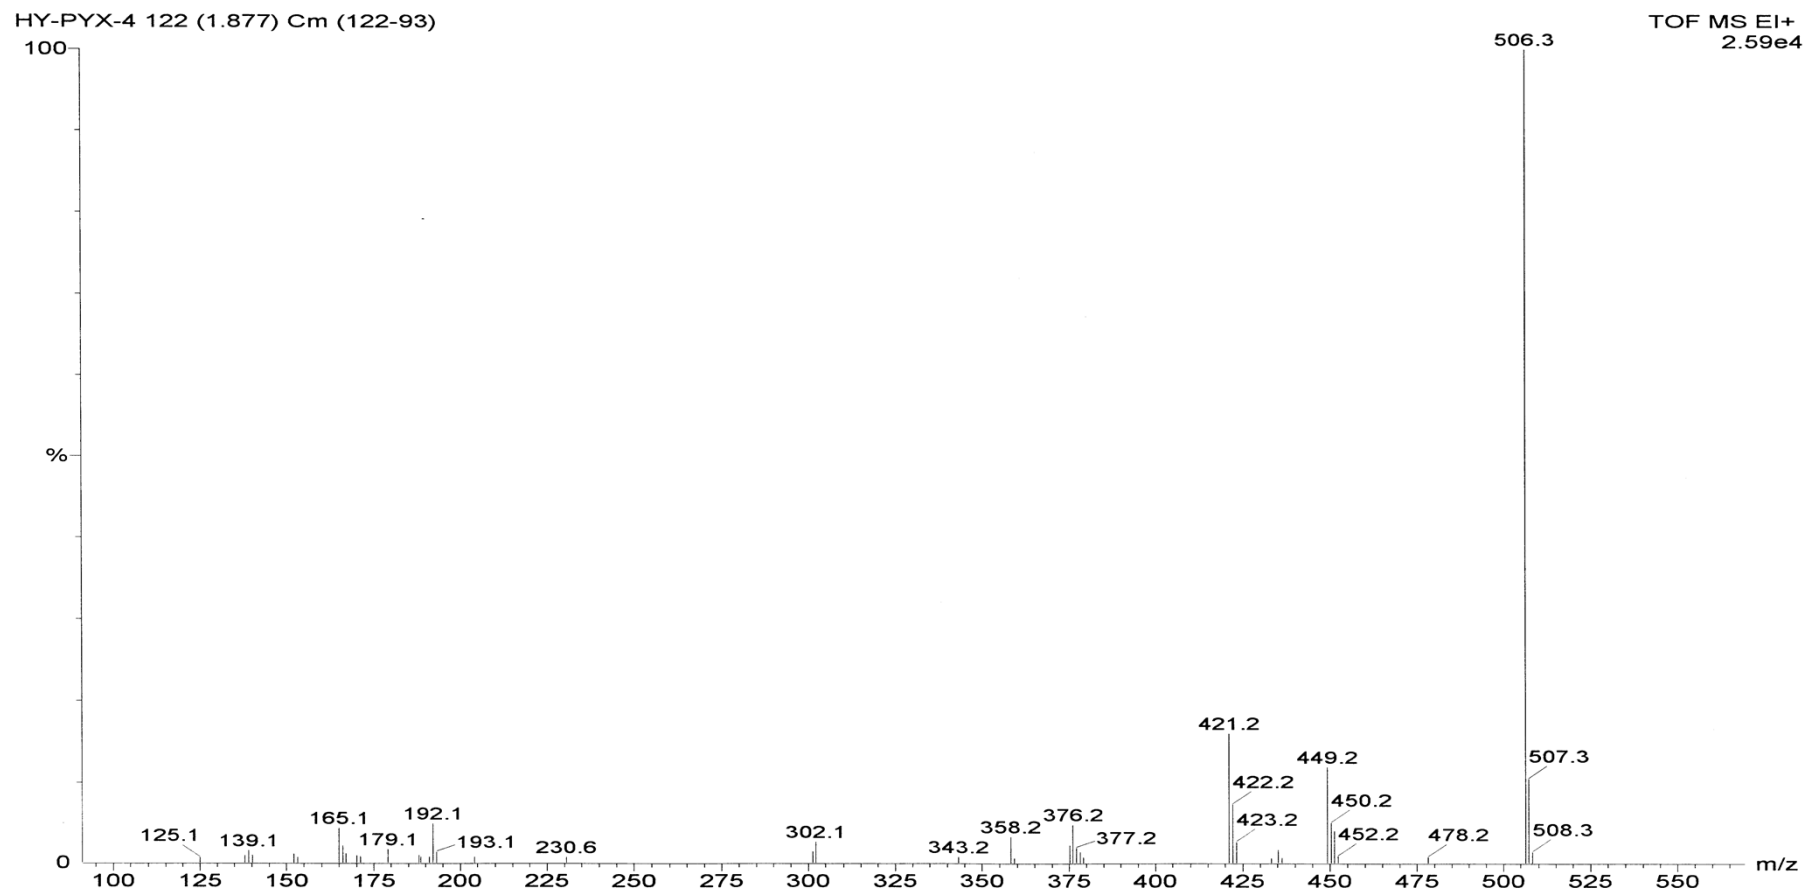

**c**

**Fig. S17.**  $^1\text{H}$  (a),  $^{13}\text{C}$  NMR (b) and EI-TOF-MS (c) spectra of compound 7.

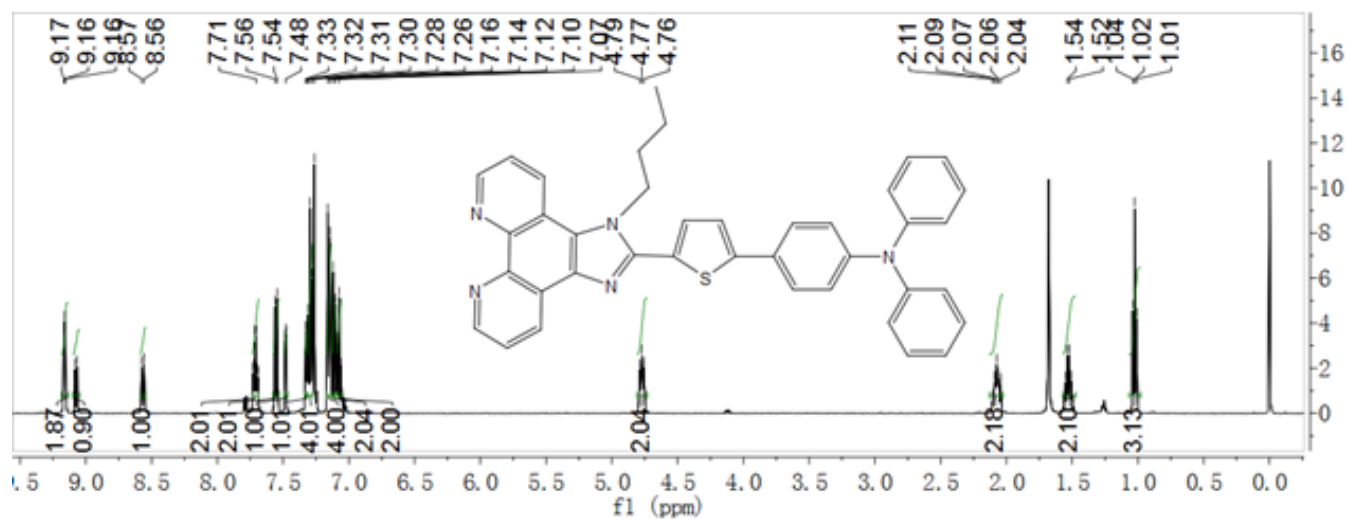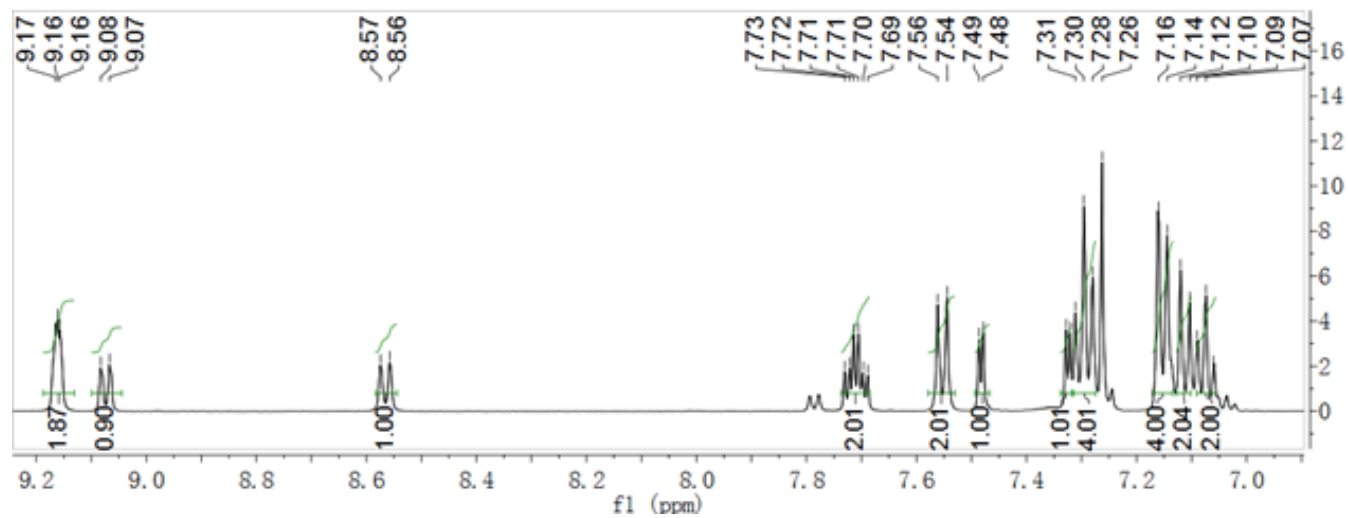

a



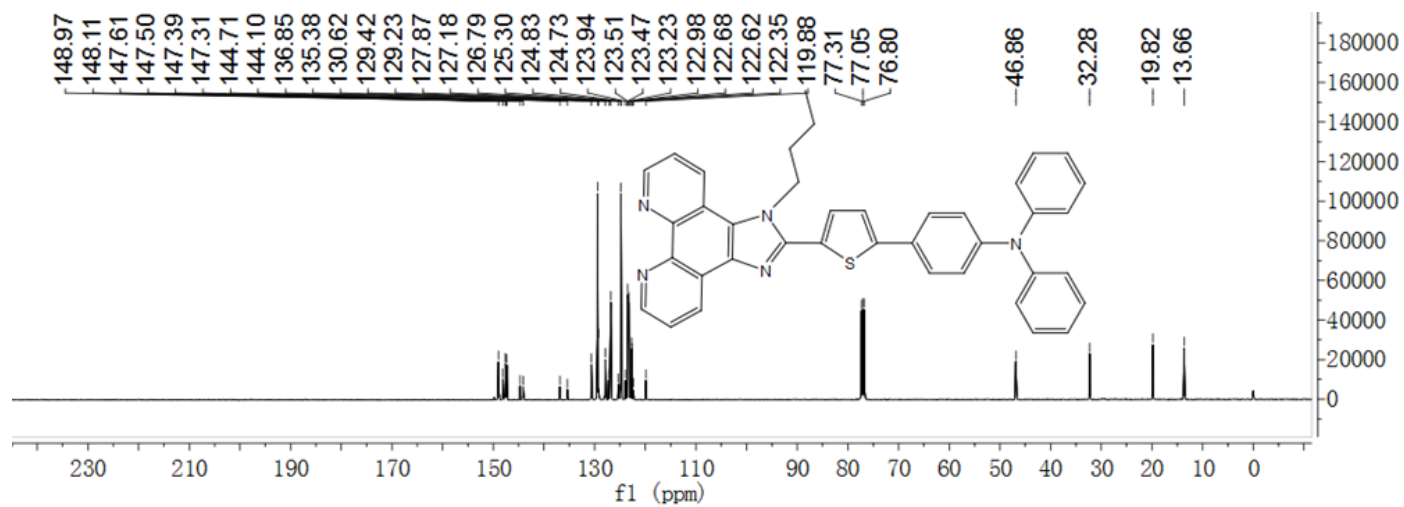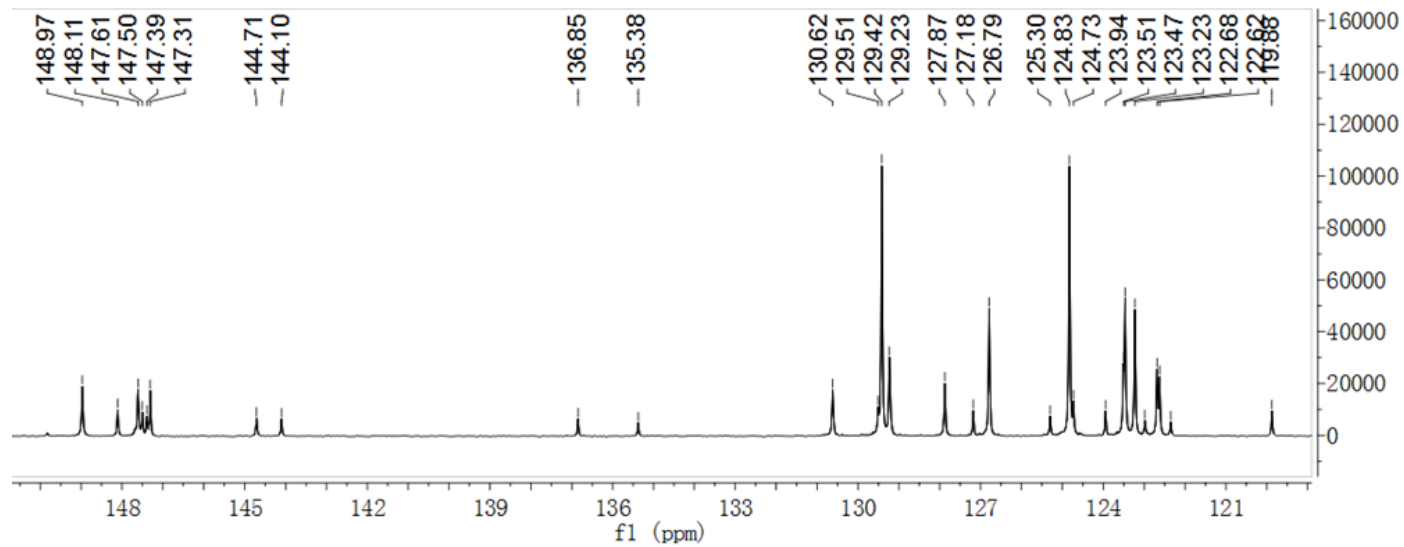

**b**

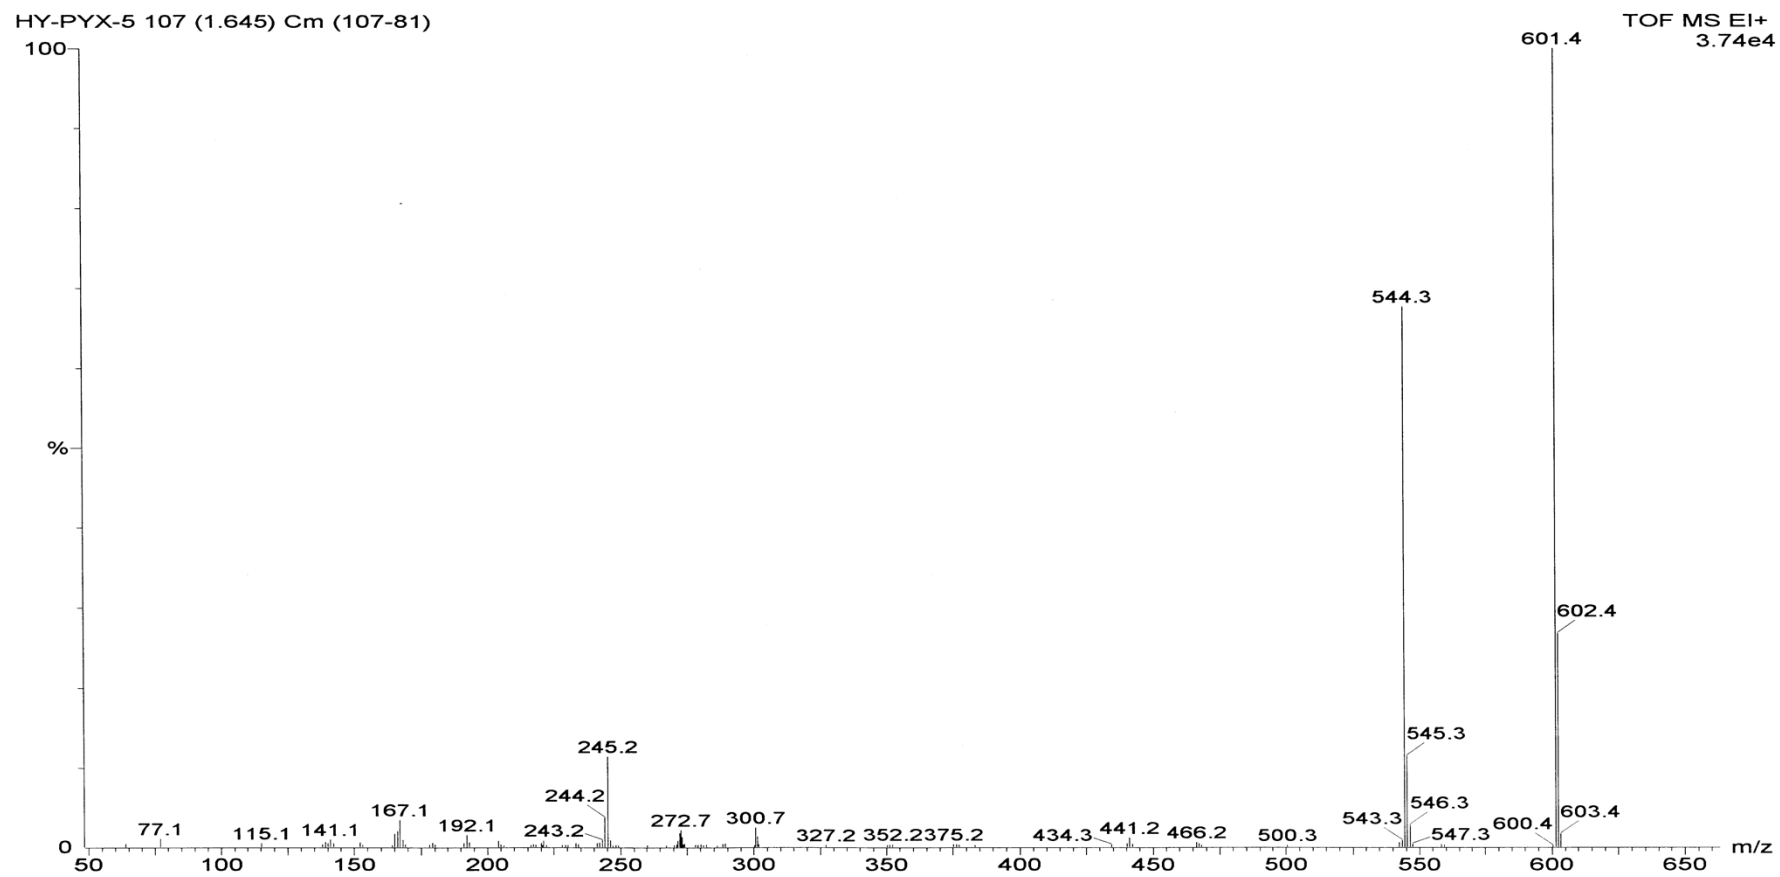

c

**Fig. S18.**  $^1\text{H}$  (a),  $^{13}\text{C}$  NMR (b) and EI-TOF-MS (c) spectra of compound **8**.

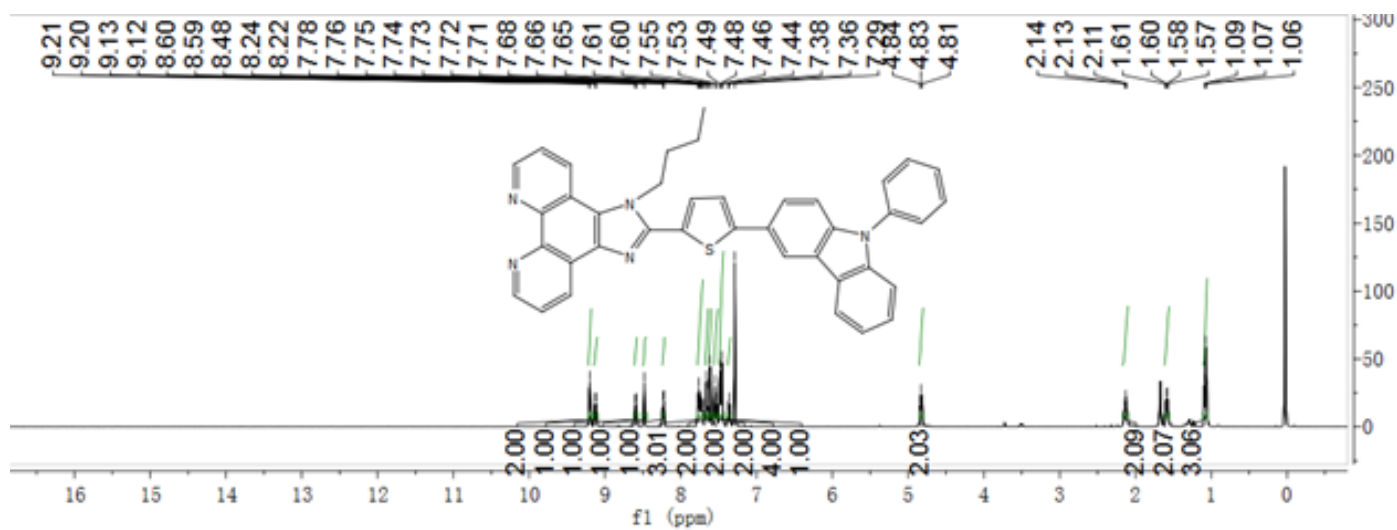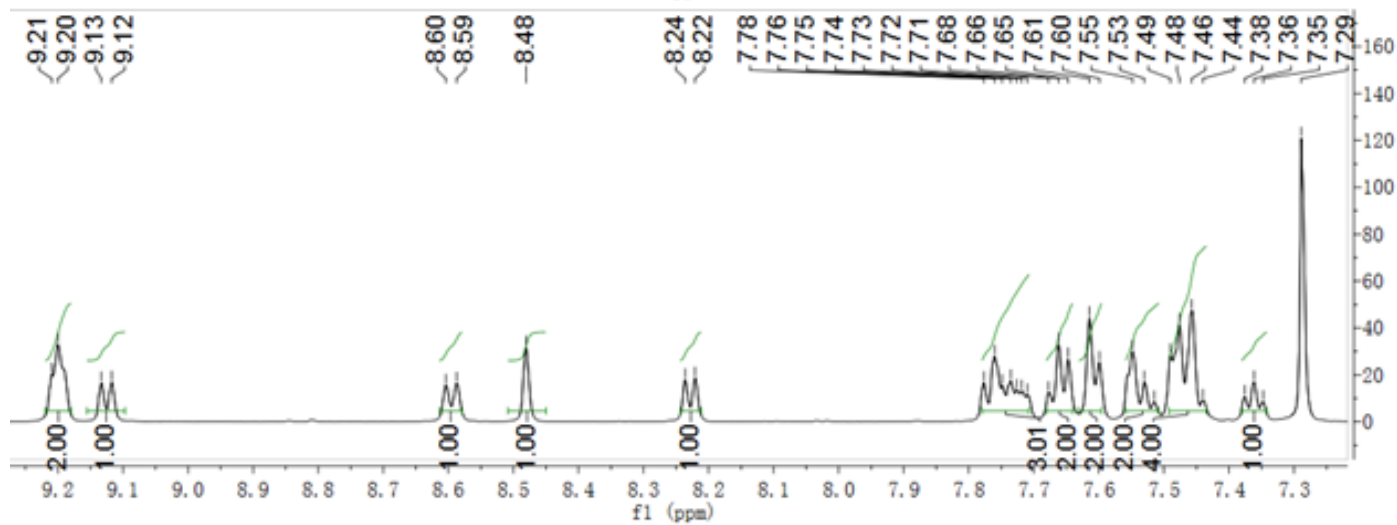

a

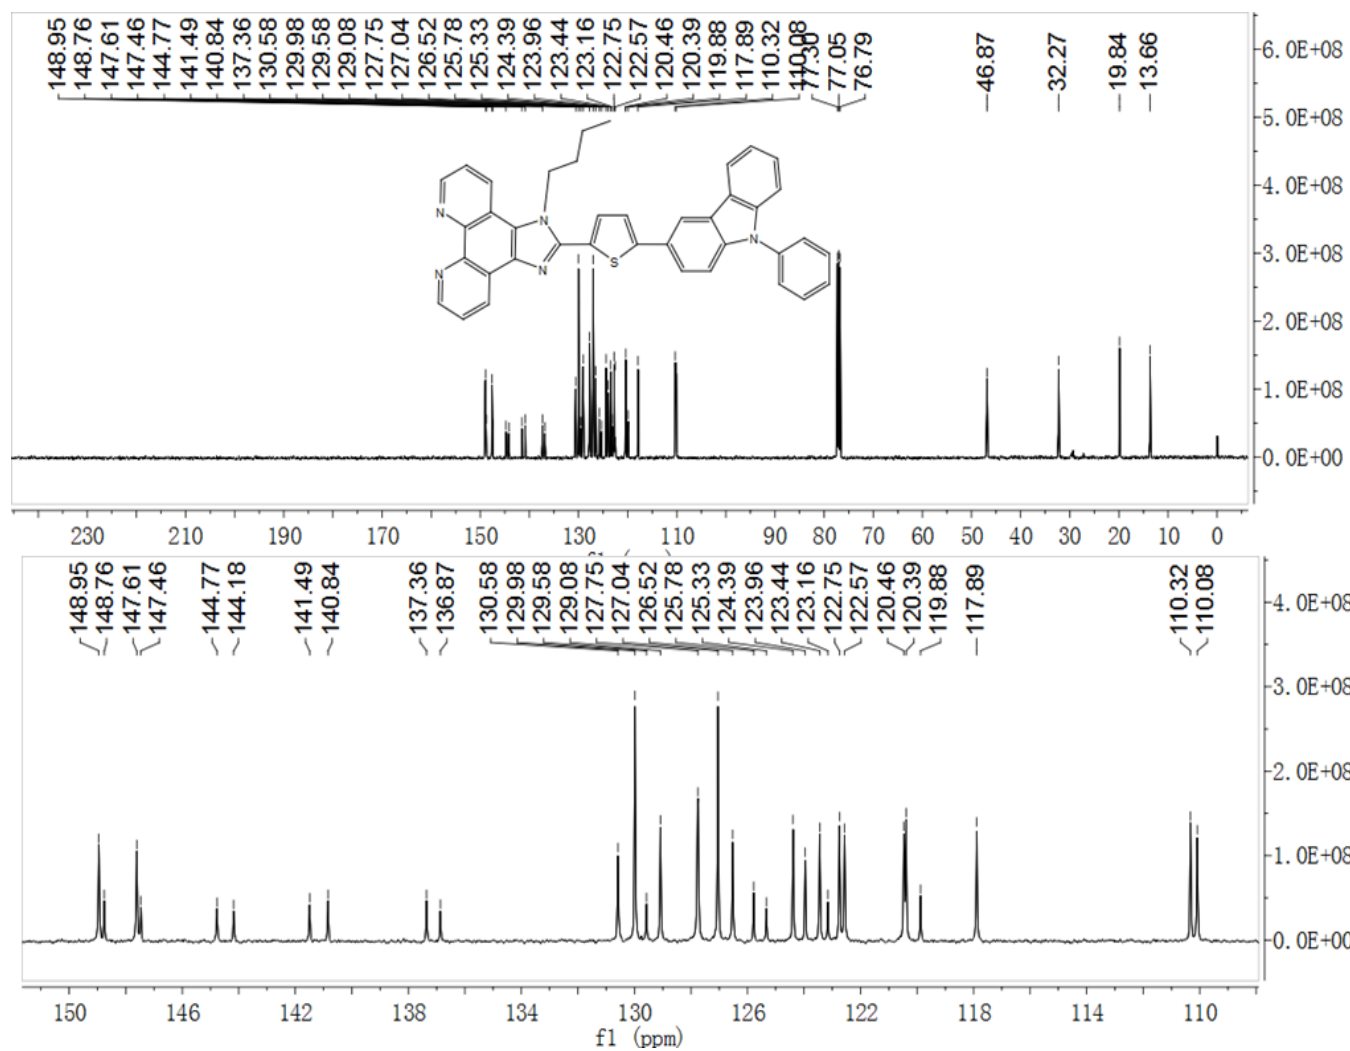

**b**

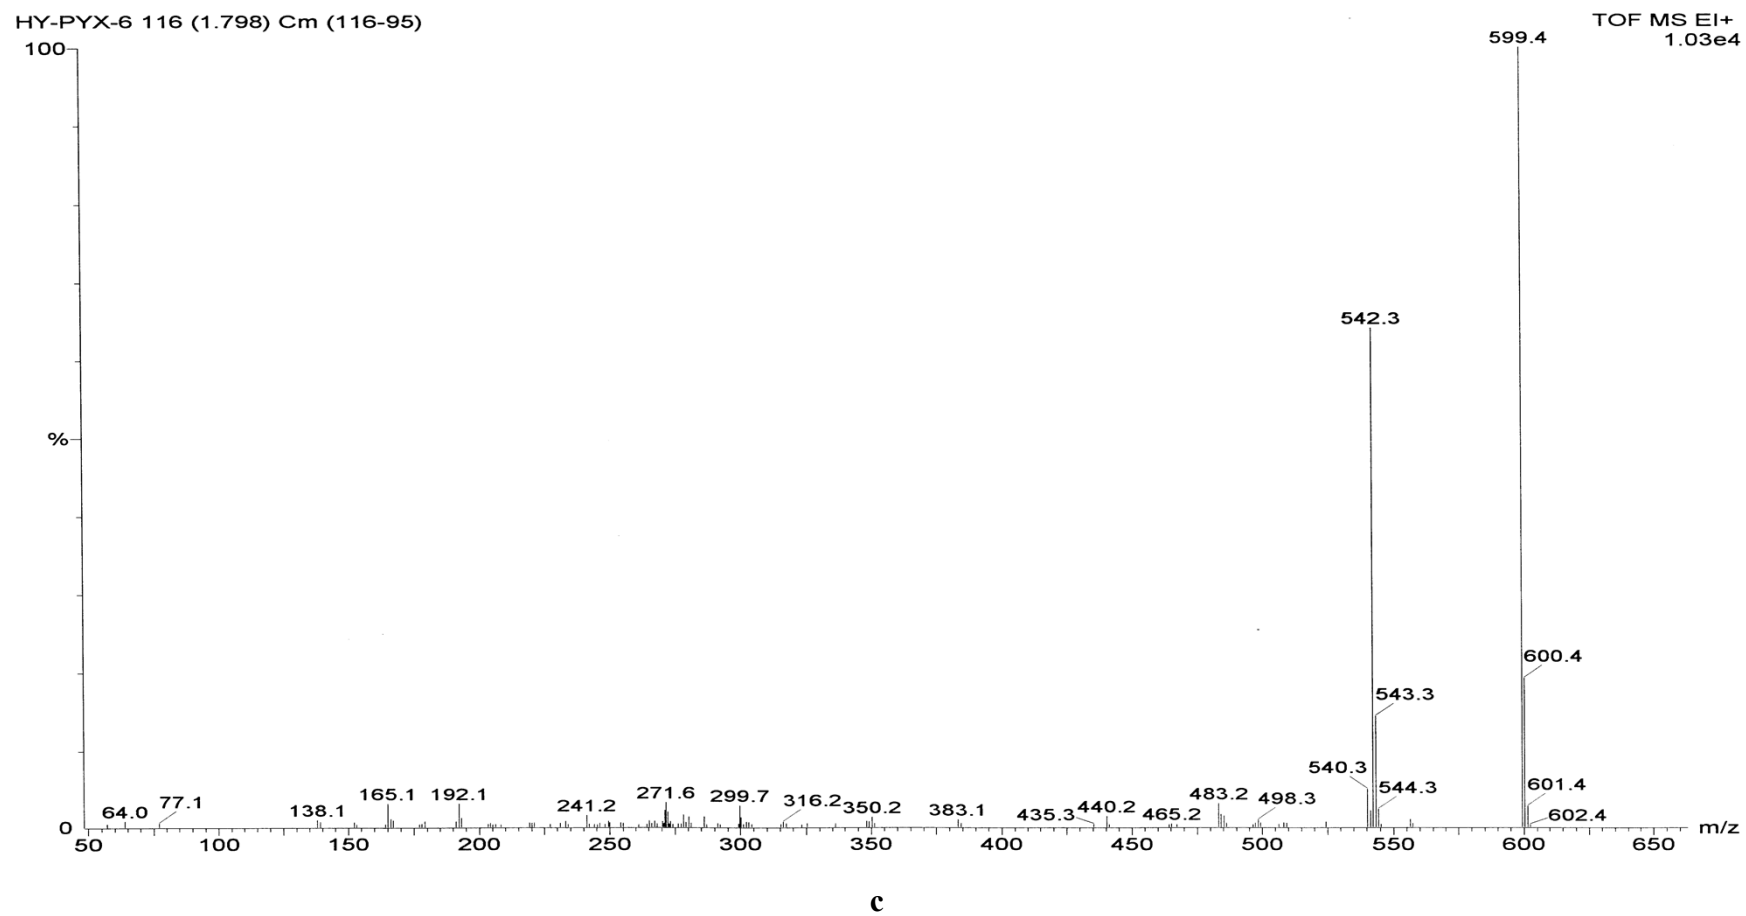

**Fig. S19.**  $^1\text{H}$  (a),  $^{13}\text{C}$  NMR (b) and EI-TOF-MS (c) spectra of compound **9**.

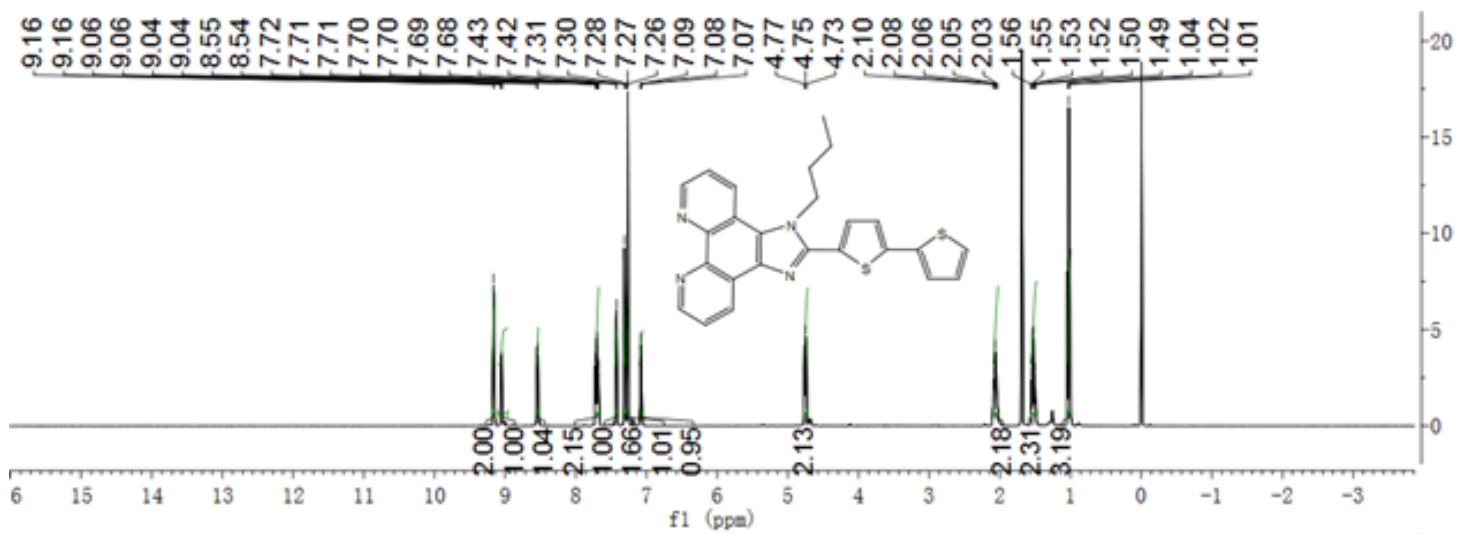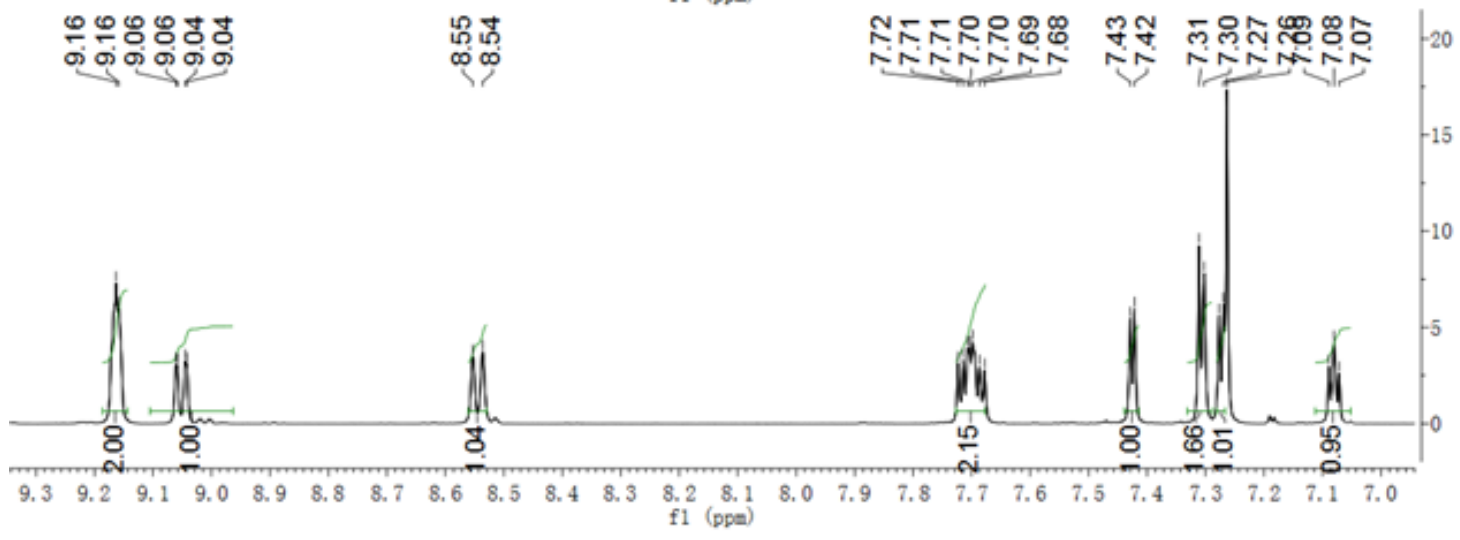

a

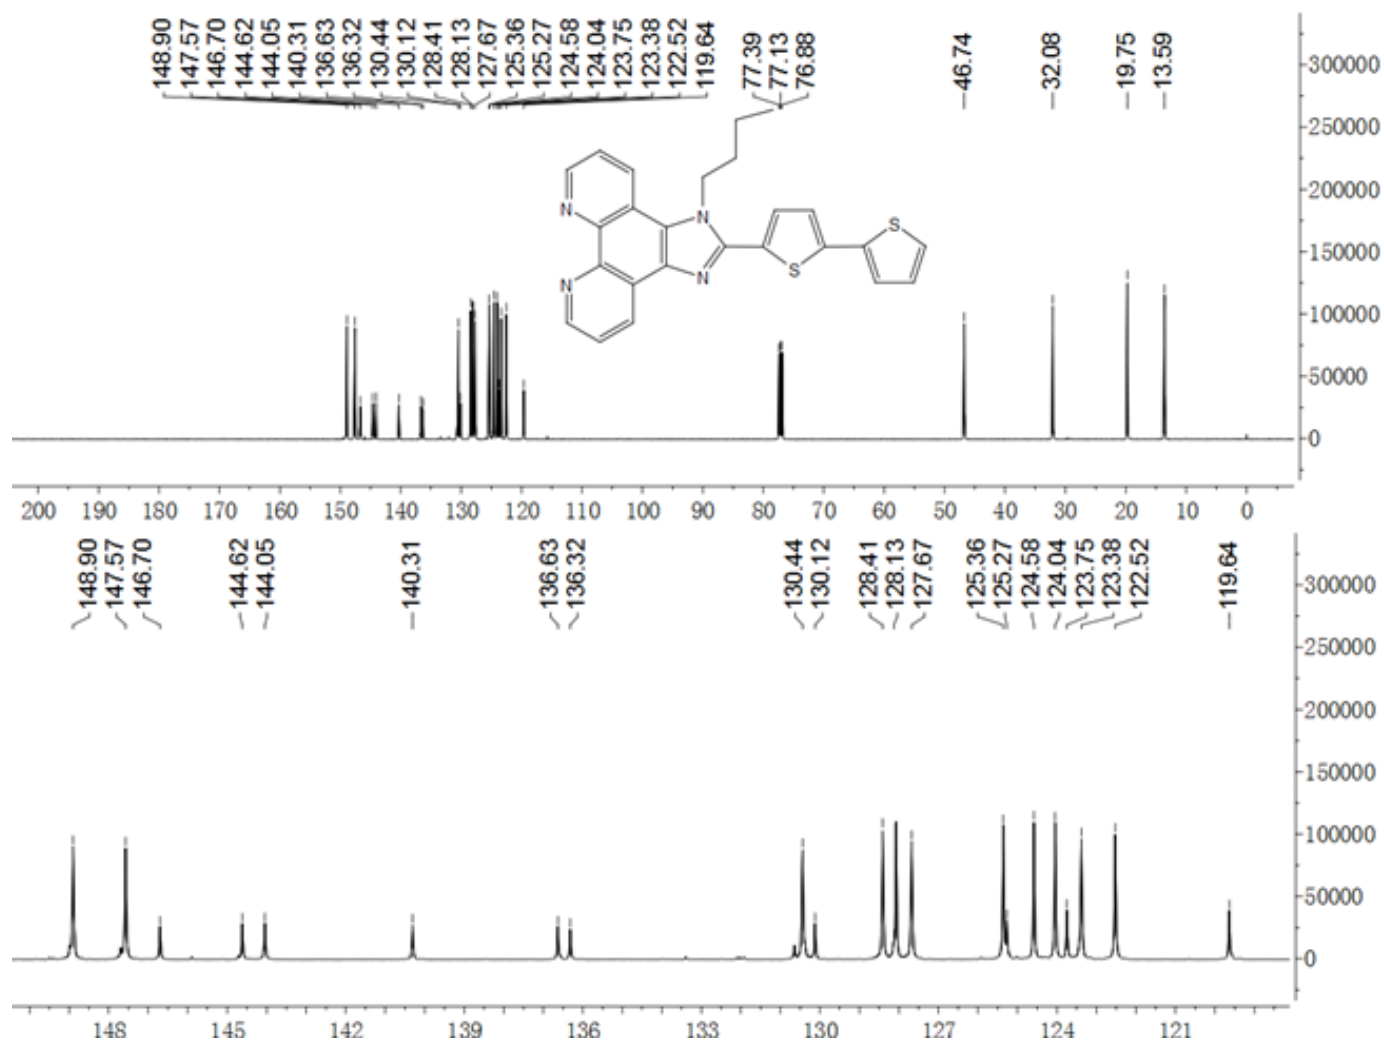

**b**

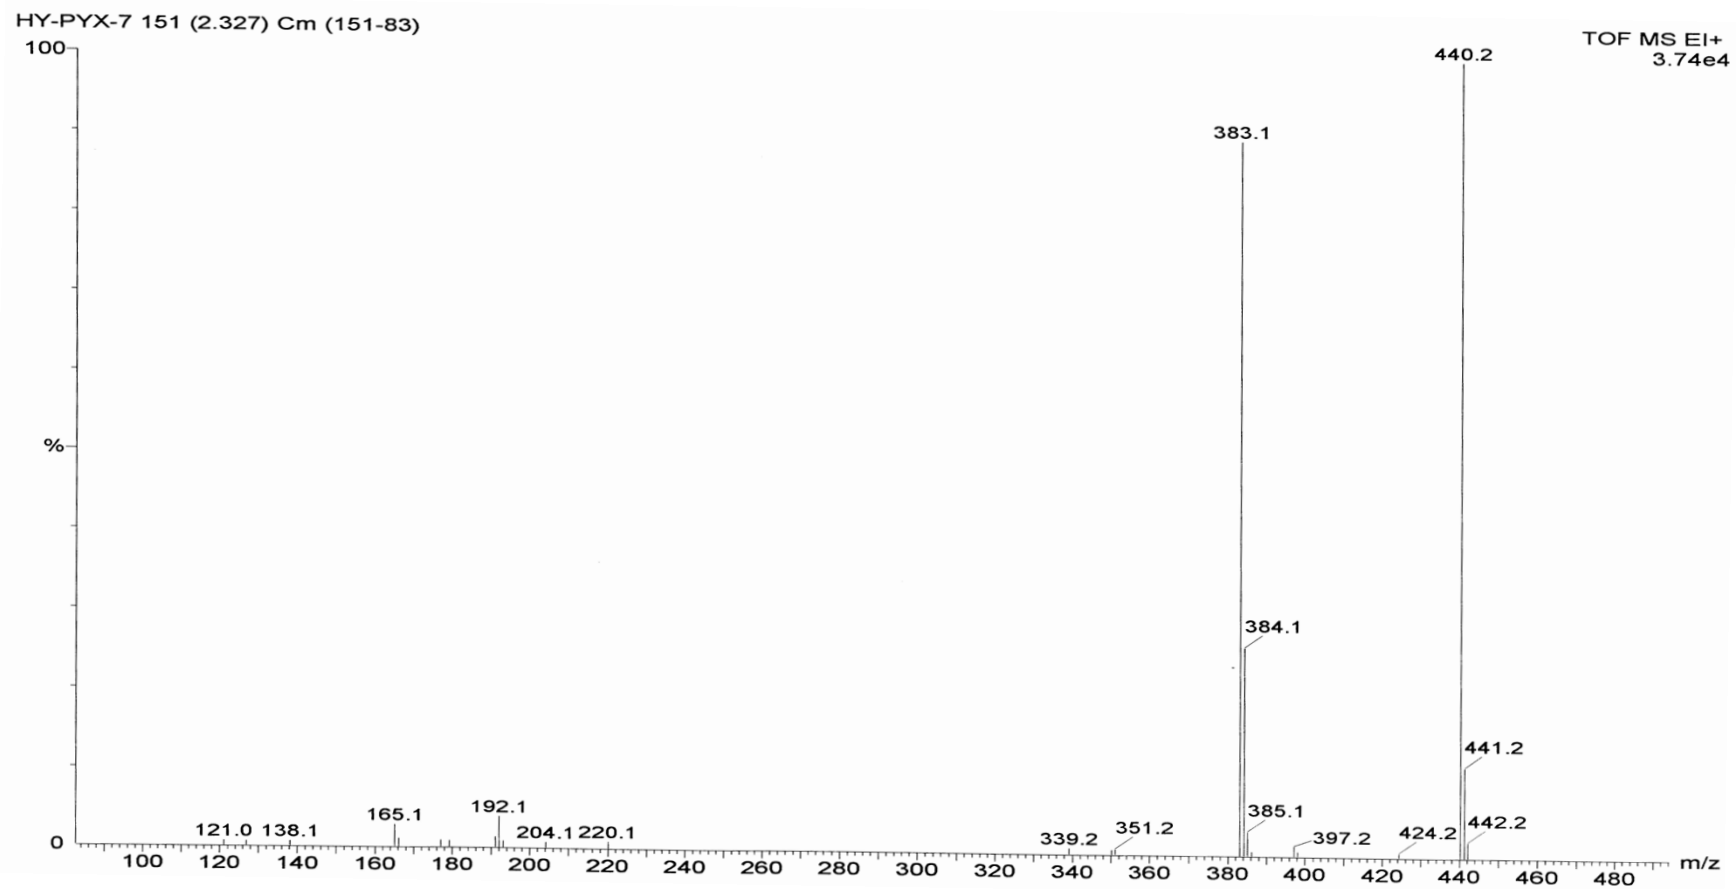

c

**Fig. S110.**  $^1\text{H}$  (a),  $^{13}\text{C}$  NMR (b) and EI-TOF-MS (c) spectra of compound 10.



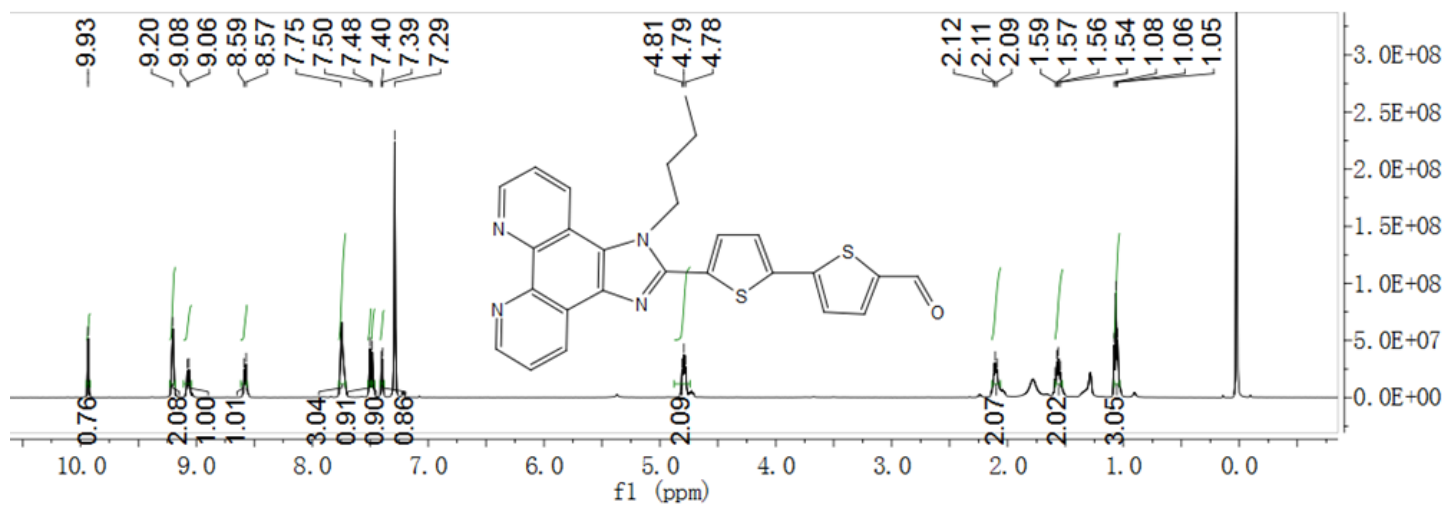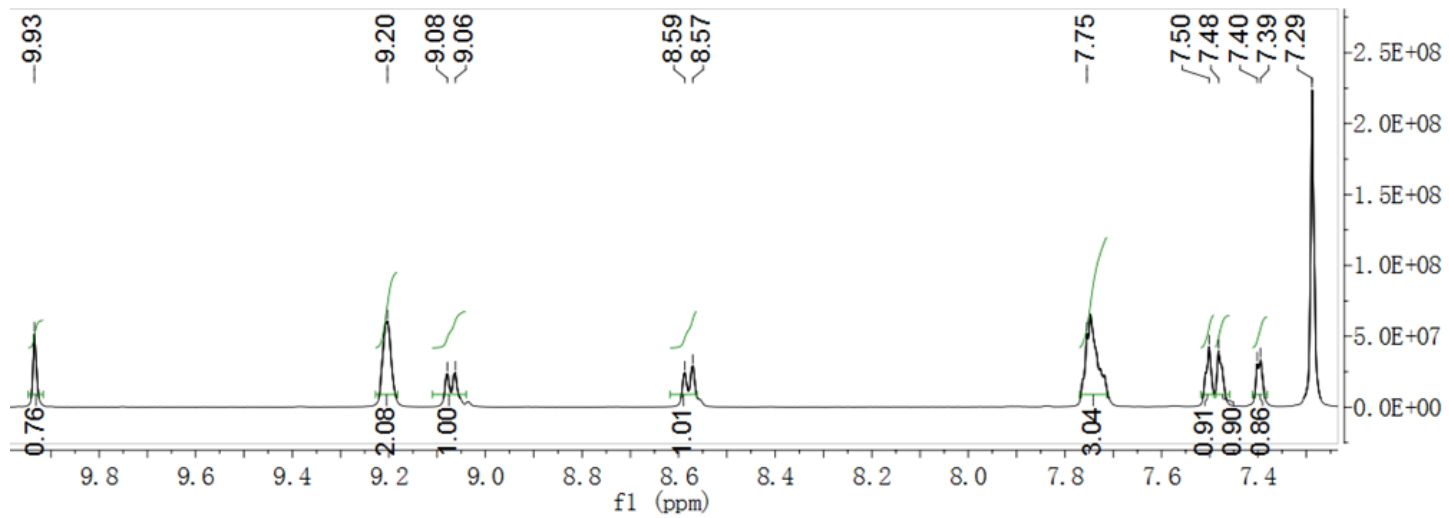

a

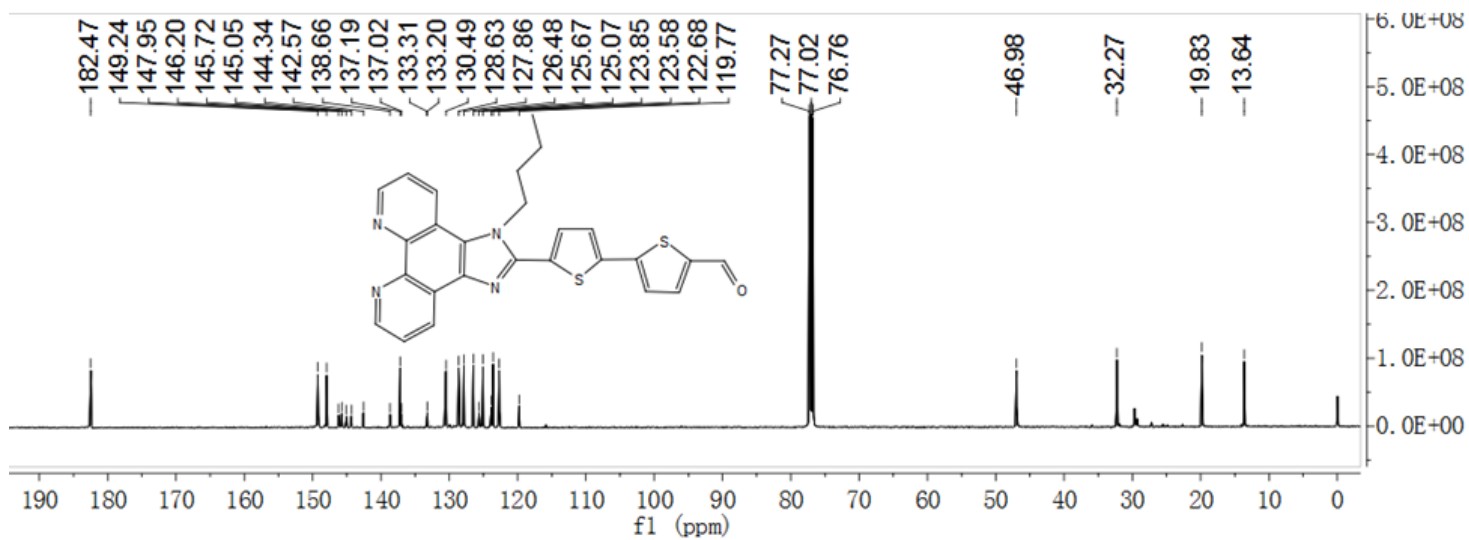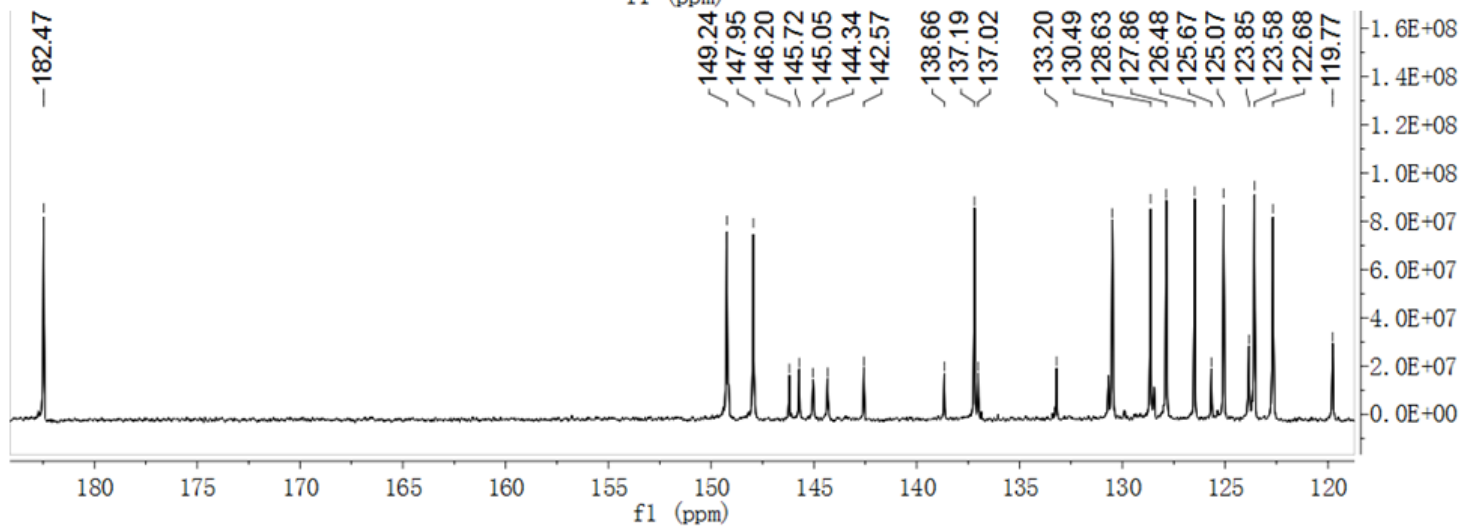

**b**

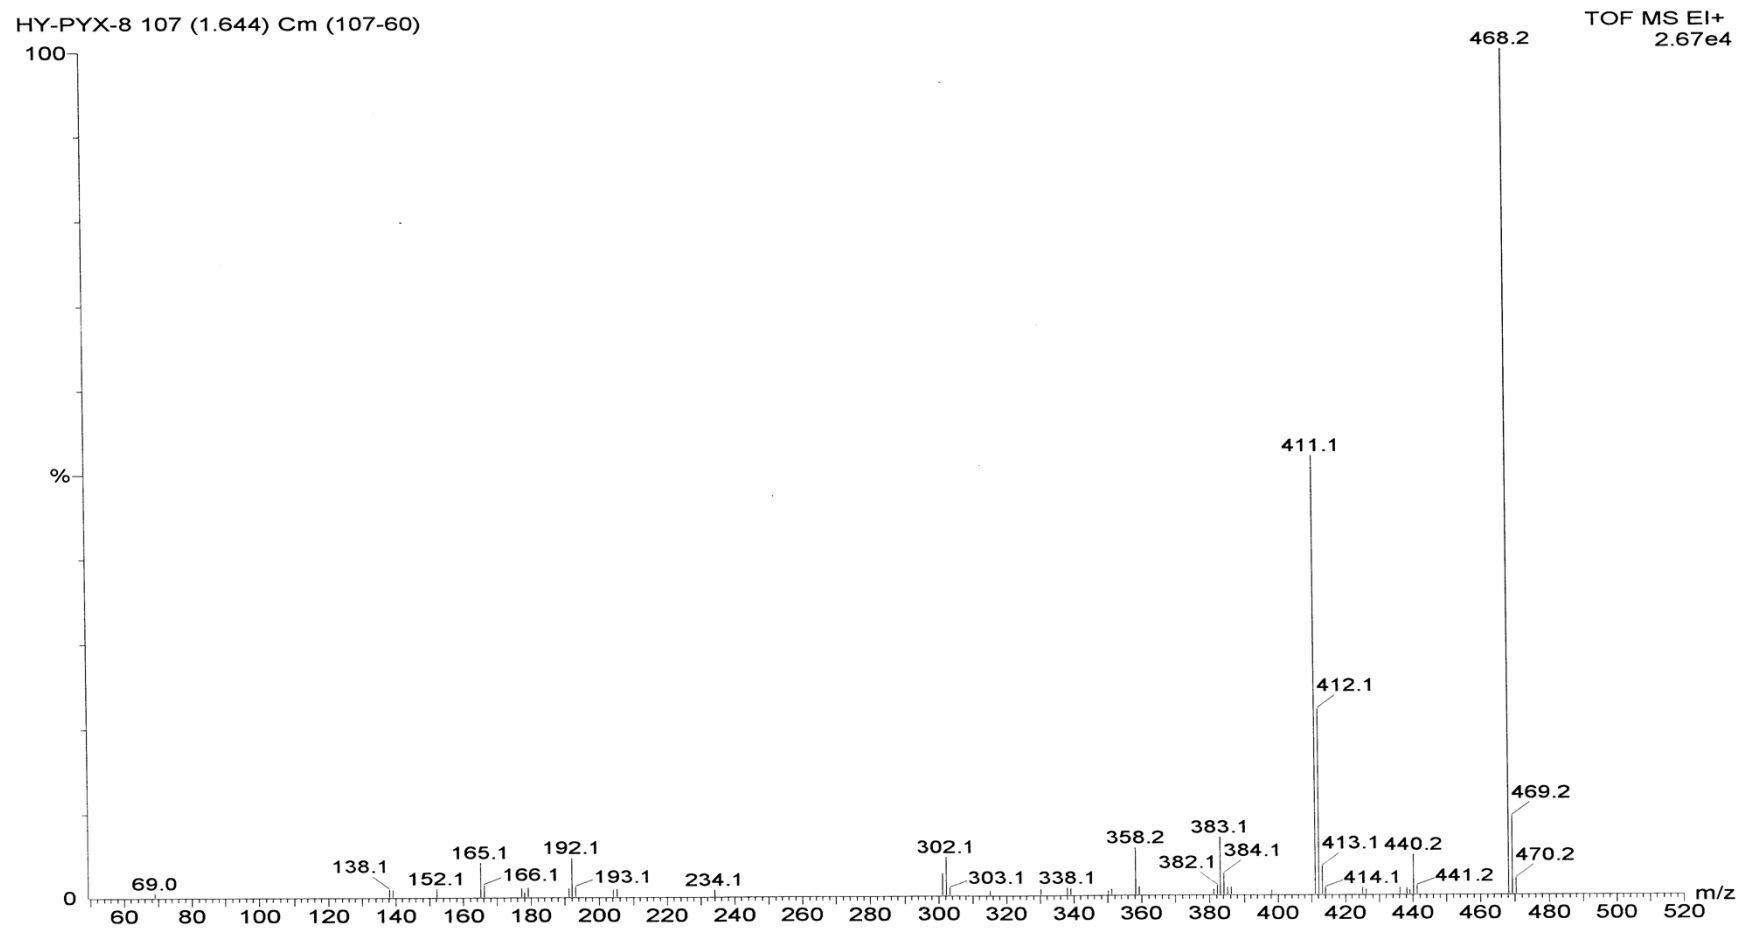

c

**Fig. S111.**  $^1\text{H}$  (a),  $^{13}\text{C}$  NMR (b) and EI-TOF-MS (c) spectra of compound 11.

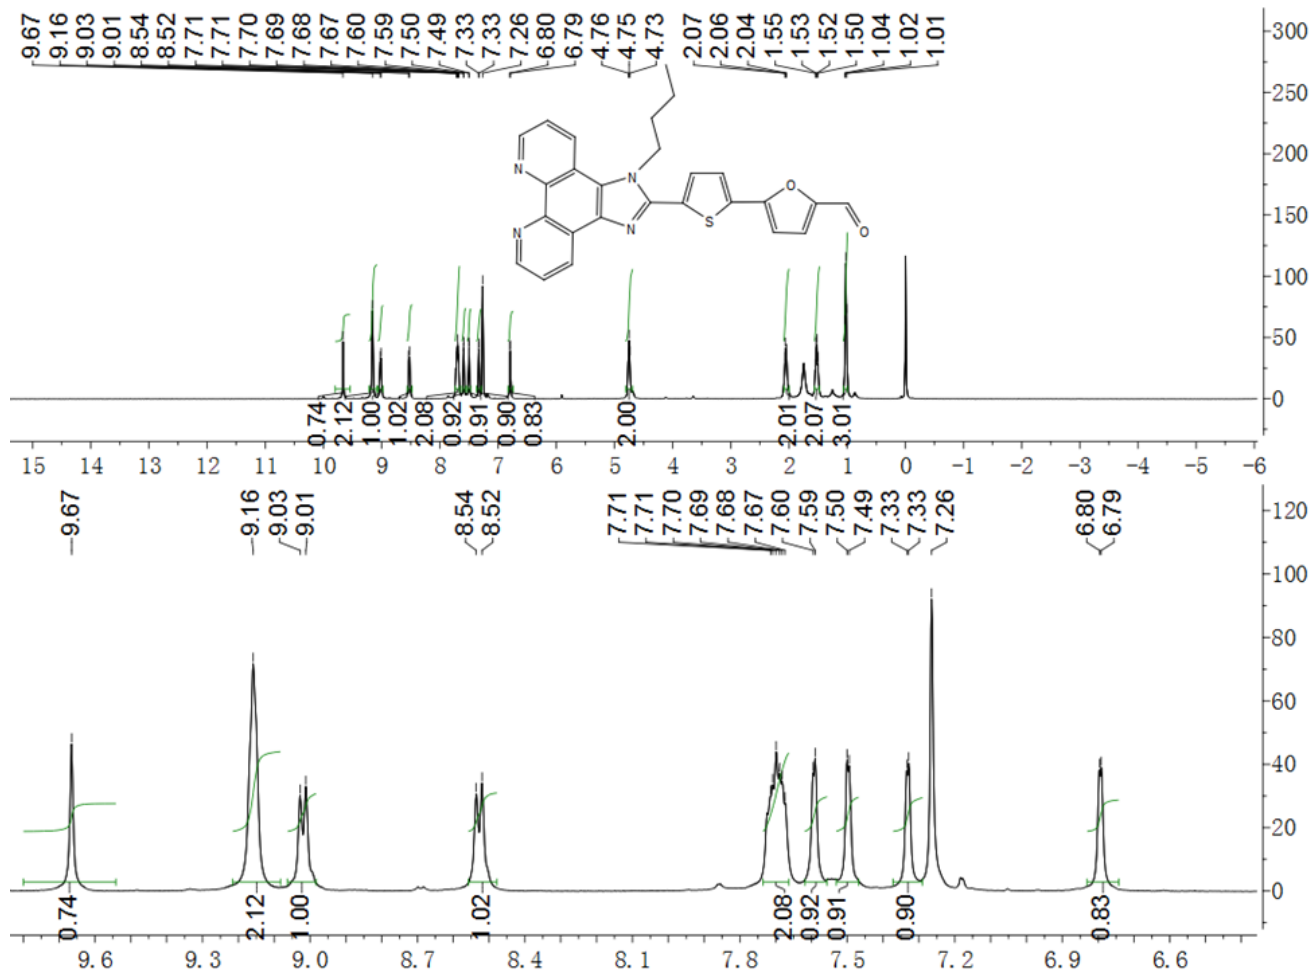

a

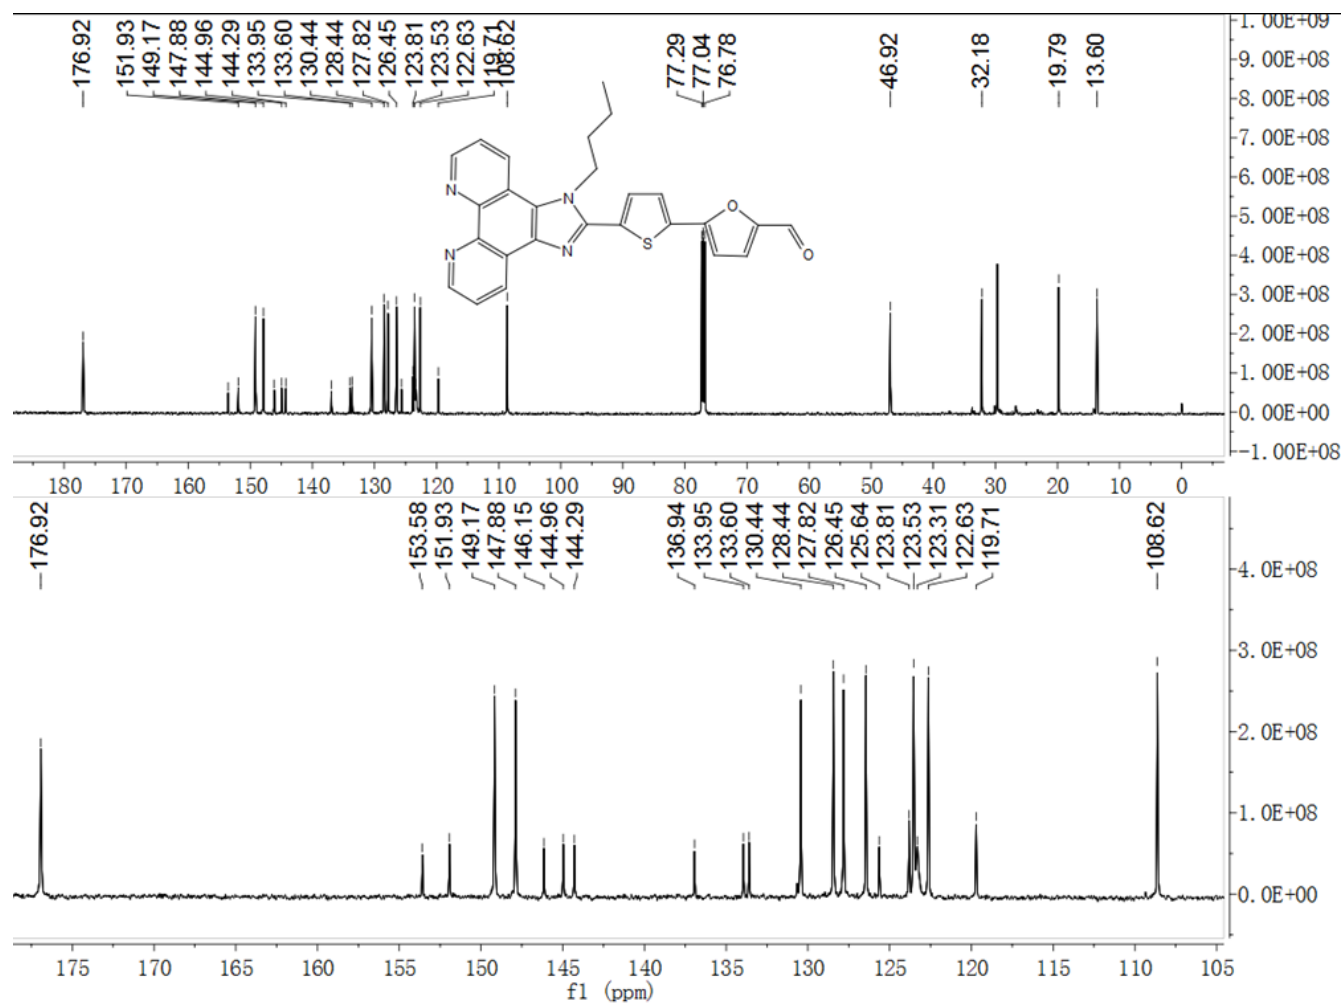

**b**

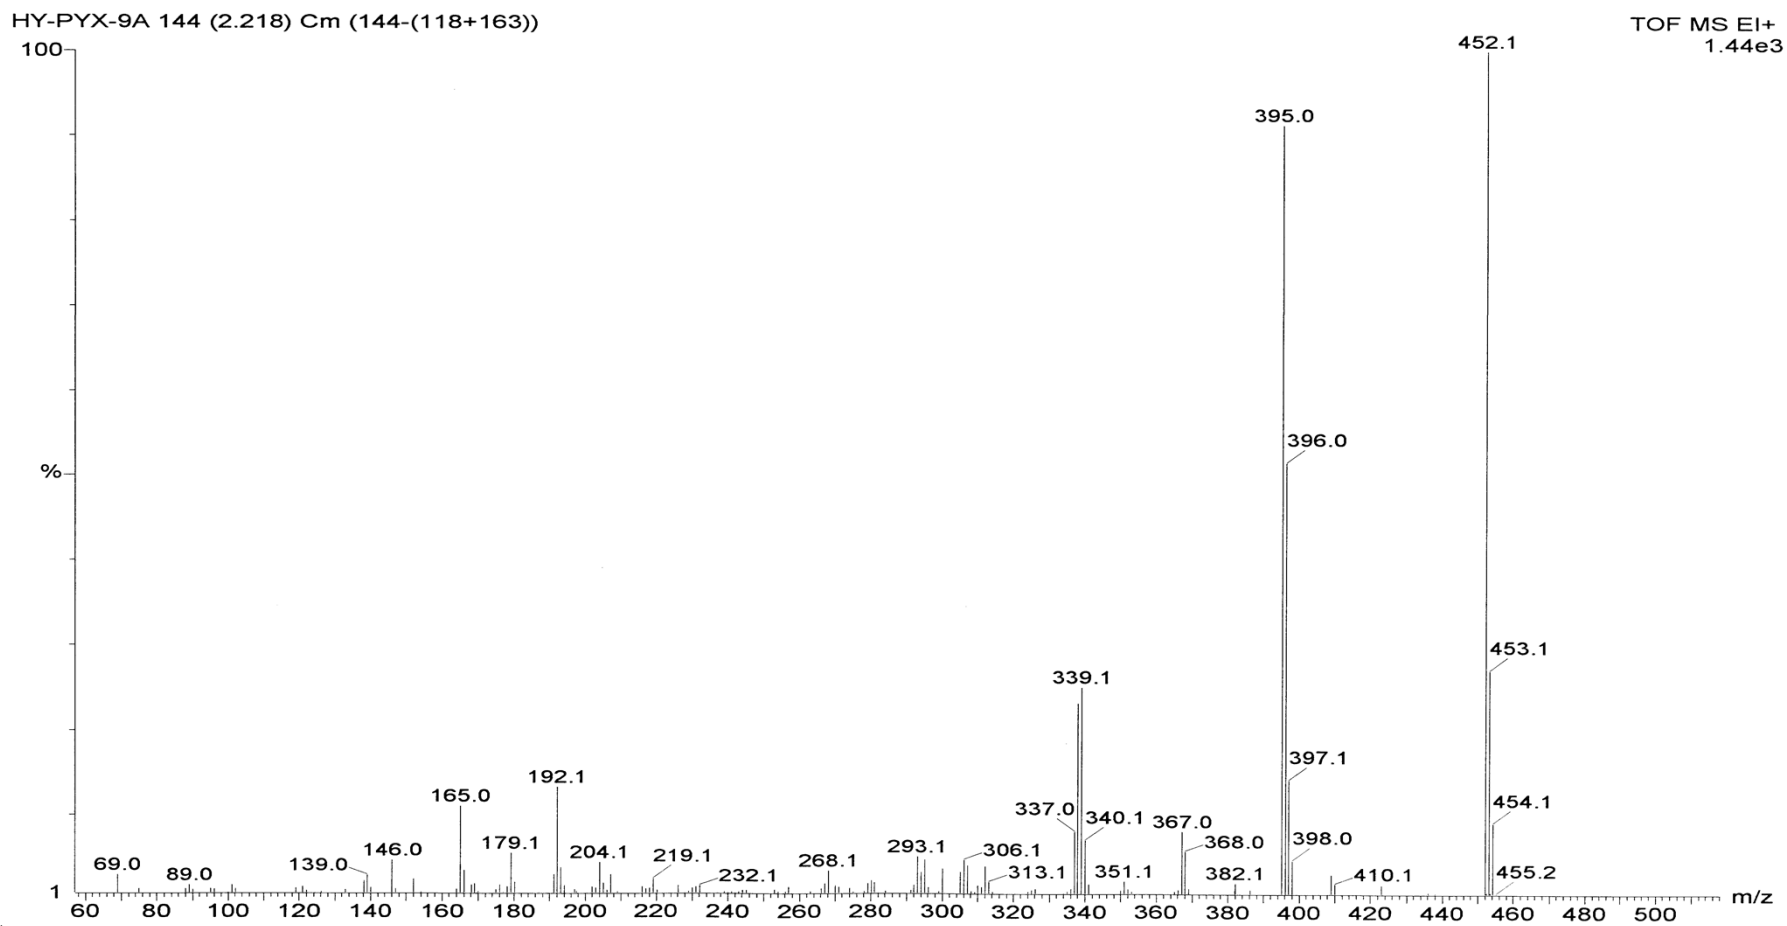

c

**Fig. S112.**  $^1\text{H}$  (a),  $^{13}\text{C}$  NMR (b) and EI-TOF-MS (c) spectra of compound 12.

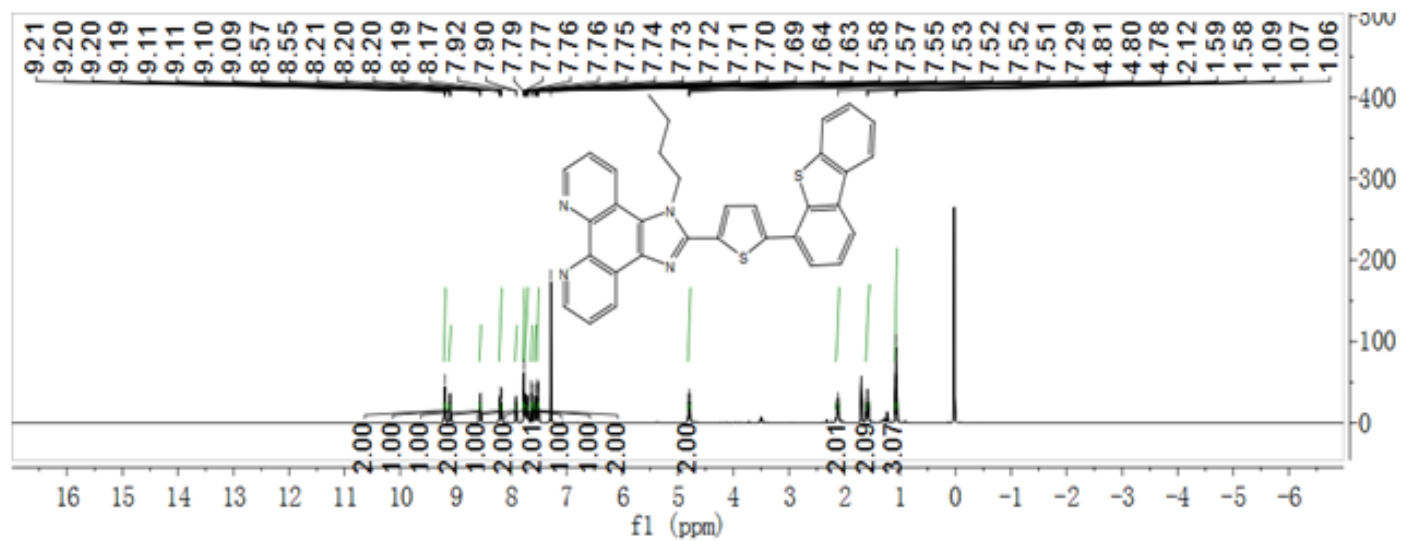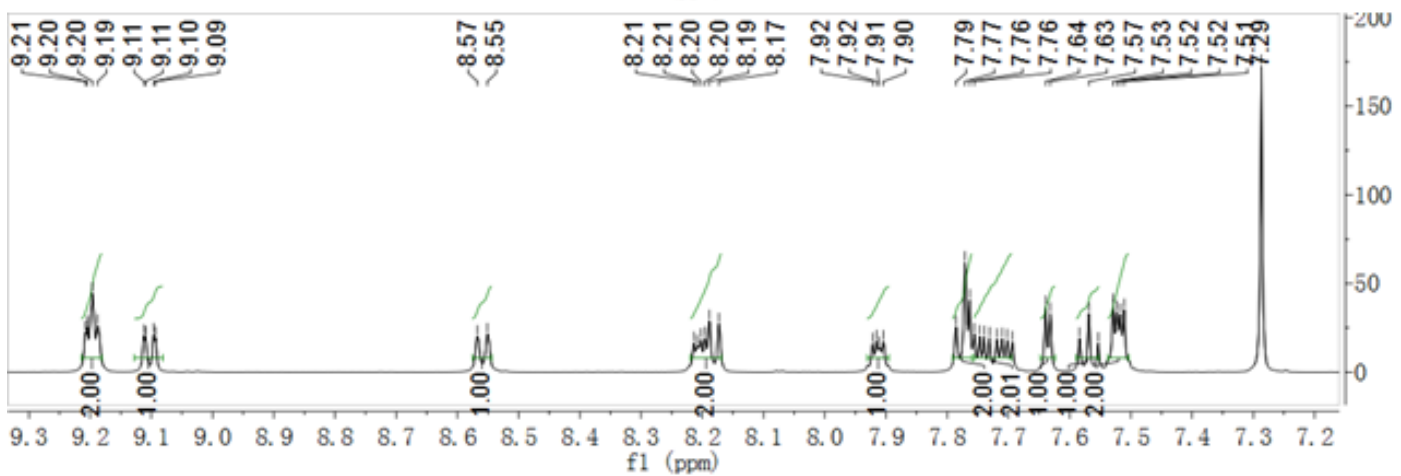

a

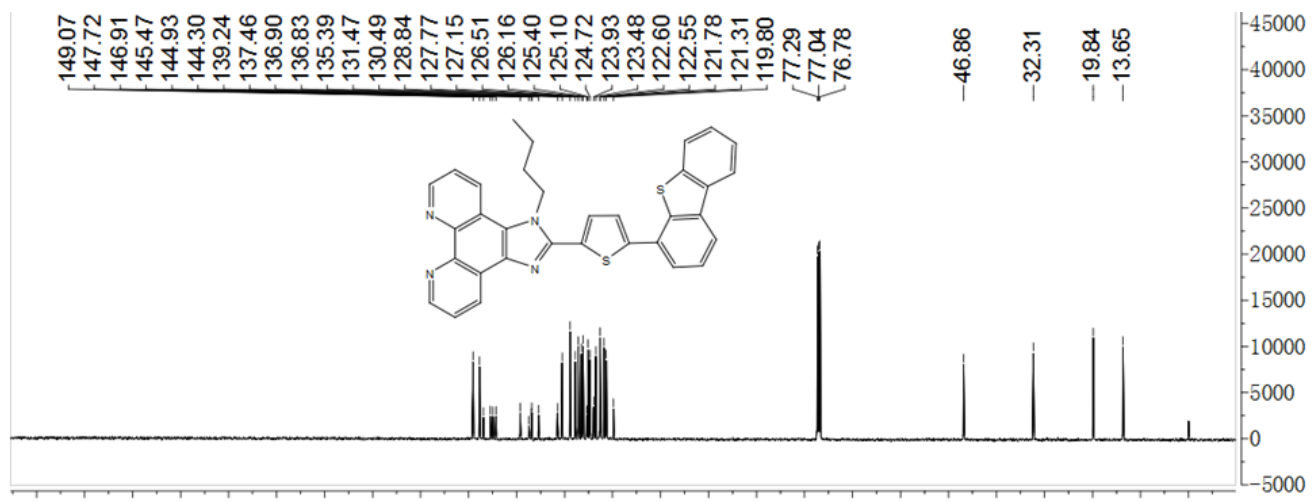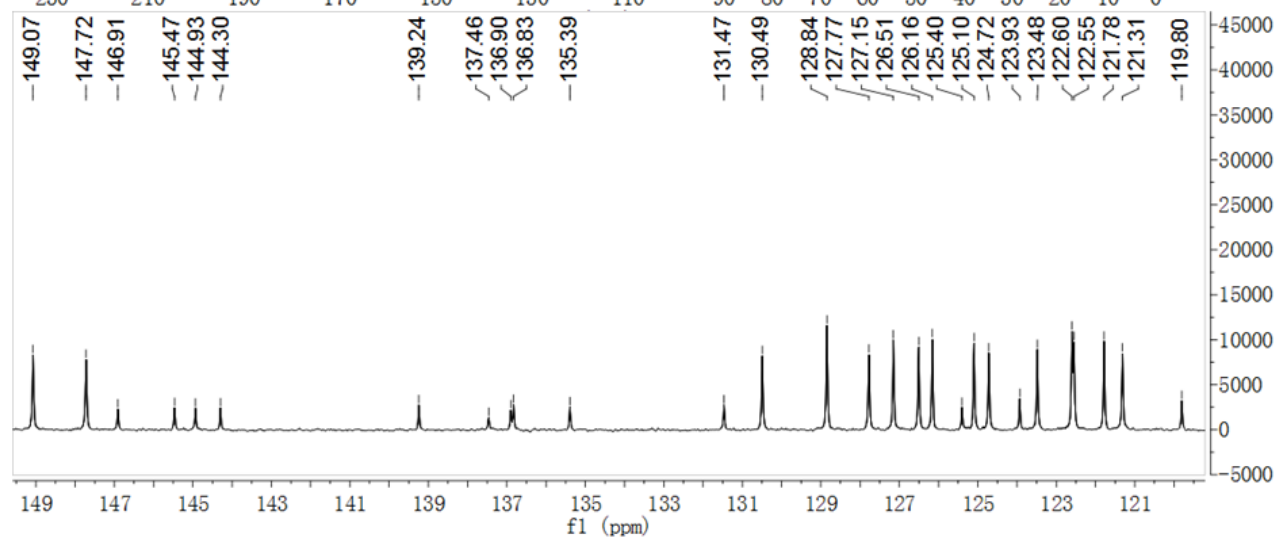

**b**



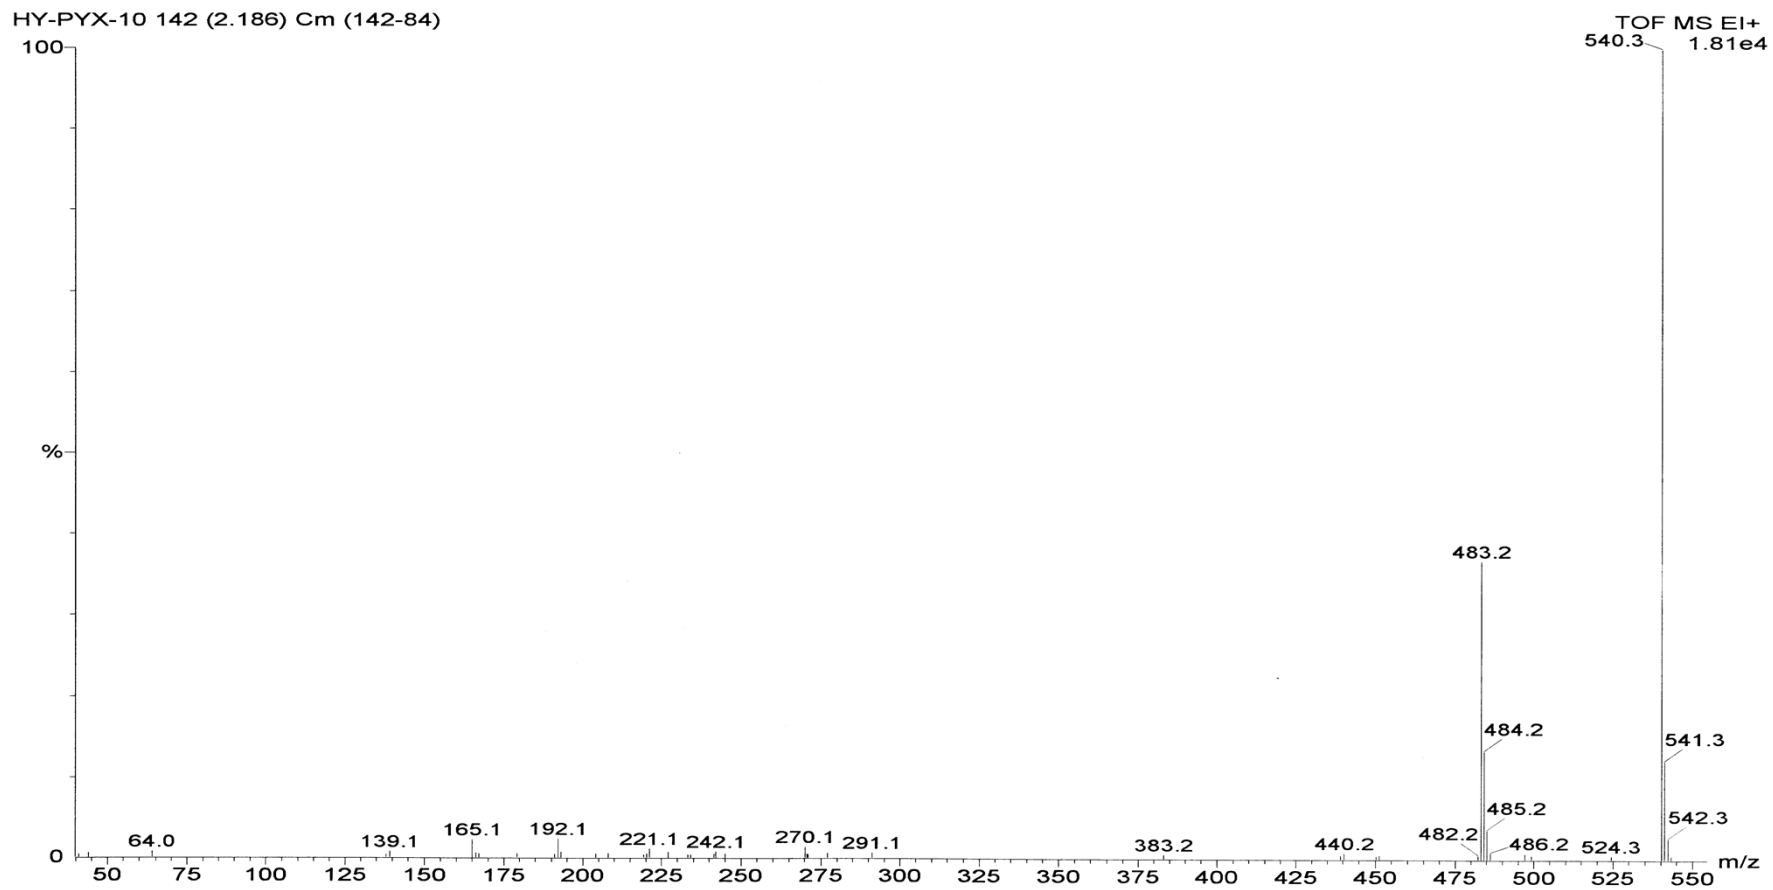

c

**Fig. S113.**  $^1\text{H}$  (a),  $^{13}\text{C}$  NMR (b) and EI-TOF-MS (c) spectra of compound **13**.

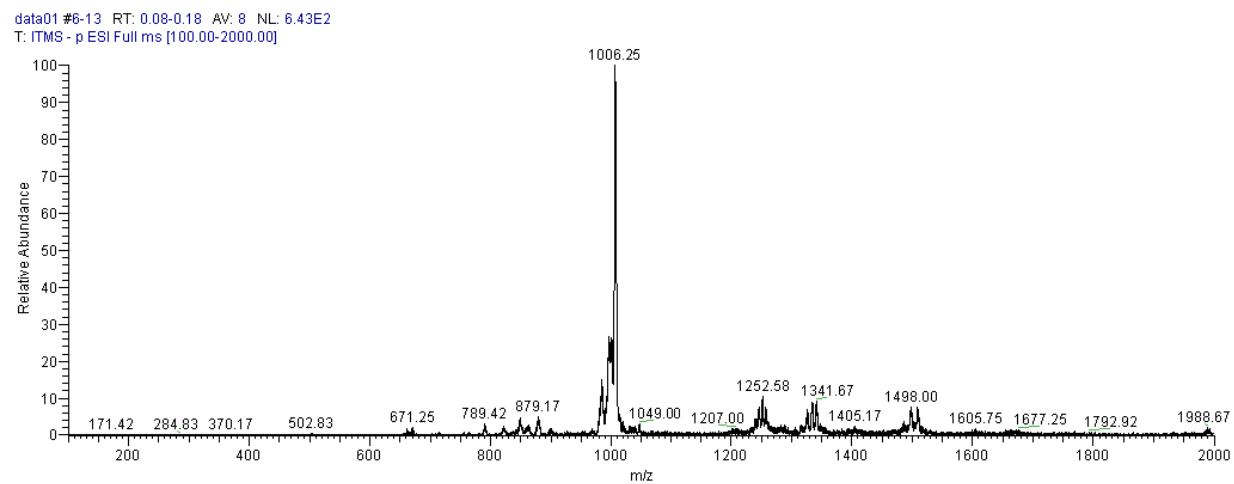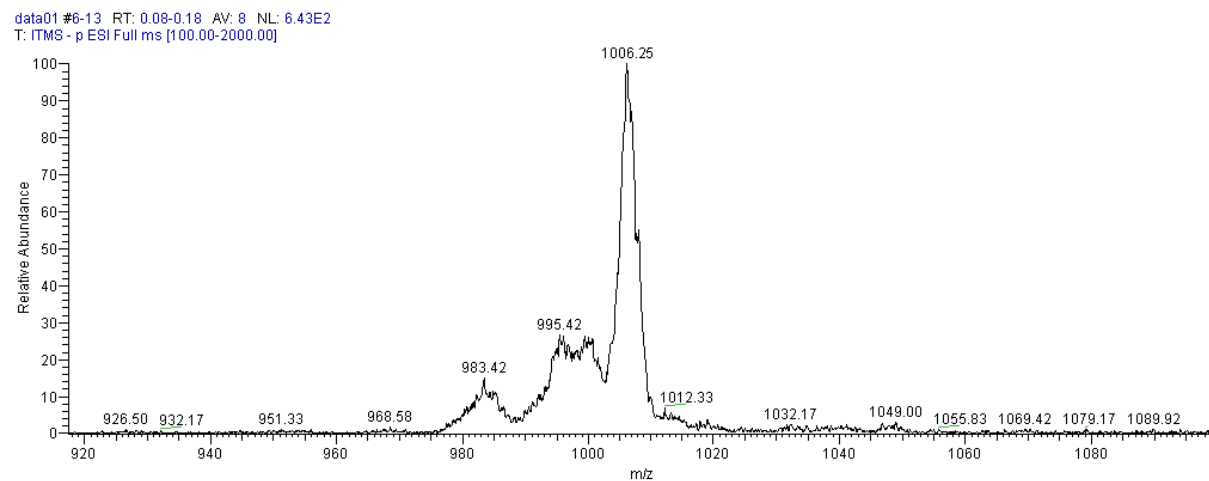

**Fig. S114.** ESI-MS spectrum of compound **BM3**.

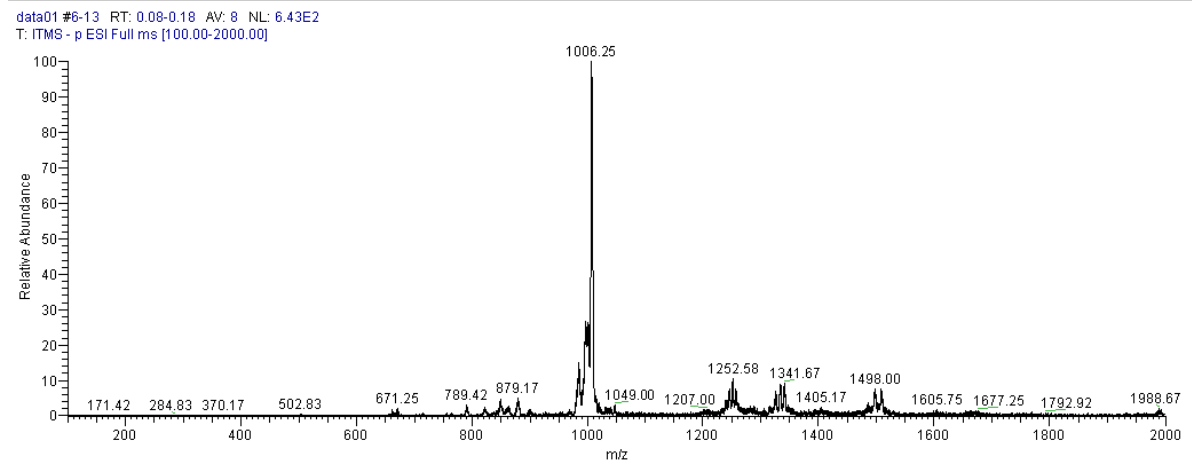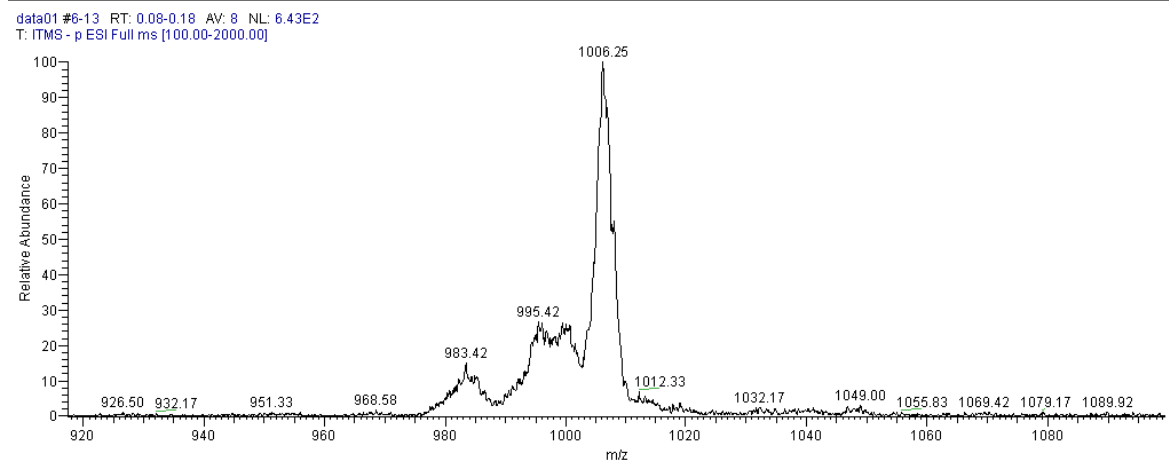

**Fig. S115.** ESI-MS spectrum of compound **BM4**.

**Table S11.** Selected bond lengths [ $\text{\AA}$ ] and bond angles [ $^\circ$ ] for compounds **3-13**.

| Bond distances            |          | Bond angles |           |
|---------------------------|----------|-------------|-----------|
| <b>3·CHCl<sub>3</sub></b> |          |             |           |
| N1–C1                     | 1.323(5) | C1–N1–C12   | 117.8(2)  |
| N1–C12                    | 1.354(4) | C10–N2–C11  | 117.3(3)  |
| N2–C10                    | 1.322(6) | C5–N3–C13   | 105.9(2)  |
| N2–C11                    | 1.349(4) | C6–N4–C13   | 104.3(3)  |
| N3–C18                    | 1.458(4) | S1–C17–C16  | 113.0(4)  |
| N3–C5                     | 1.385(3) | S1–C14–C15  | 110.8(3)  |
| N3–C13                    | 1.378(4) |             |           |
| N4–C6                     | 1.381(4) |             |           |
| N4–C13                    | 1.322(4) |             |           |
| N4–C13                    | 1.322(4) |             |           |
| S1–C17                    | 1.708(5) |             |           |
| S1–C14                    | 1.716(4) |             |           |
| <b>4</b>                  |          |             |           |
| N1–C1                     | 1.321(3) | C1–N1–C12   | 118.1(2)  |
| N1–C12                    | 1.356(2) | C10–N2–C11  | 118.3(2)  |
| N2–C10                    | 1.320(3) | C13–N3–C5   | 105.9(2)  |
| N2–C11                    | 1.351(2) | C5–N3–C18   | 127.93(2) |

|                           |          |             |           |
|---------------------------|----------|-------------|-----------|
| N3–C5                     | 1.387(2) | C5–N3–C18   | 127.93(2) |
| N3–C13                    | 1.375(2) | C13–N4–C6   | 104.56(2) |
| N3–C18                    | 1.460(2) | C17–S1–C14  | 91.7(1)   |
| N4–C6                     | 1.372(2) |             |           |
| N4–C13                    | 1.319(2) |             |           |
| S1–C14                    | 1.710(2) |             |           |
| S1–C17                    | 1.702(3) |             |           |
| <hr/>                     |          |             |           |
| <b>5·CHCl<sub>3</sub></b> |          |             |           |
| Br1–C17                   | 1.864(5) | C1–N1–C12   | 117.1(4)  |
| N1–C1                     | 1.326(6) | C10–N2–C11  | 118.4(4)  |
| N1–C12                    | 1.373(5) | C13–N3–C6   | 106.2(3)  |
| N2–C10                    | 1.318(6) | C13–N3–C18  | 126.2(3)  |
| N2–C11                    | 1.340(6) | C6–N3–C18   | 127.4(4)  |
| N3–C6                     | 1.393(5) | C13–N4–C5   | 104.9(4)  |
| N3–C13                    | 1.362(6) | C14–S1–C17  | 91.1(2)   |
| N3–C18                    | 1.467(5) | C16–C17–Br1 | 127.7(3)  |
| N4–C5                     | 1.361(5) | S1–C17–Br1  | 119.7(3)  |
| N4–C13                    | 1.325(5) |             |           |
| S1–C14                    | 1.722(5) |             |           |
| S1–C17                    | 1.722(4) |             |           |

---

---

|                         |          |            |          |
|-------------------------|----------|------------|----------|
| <b>6·H<sub>2</sub>O</b> |          |            |          |
| N1–C1                   | 1.323(4) | C1–N1–C12  | 117.5(3) |
| N1–C12                  | 1.357(3) | C10–N2–C11 | 117.5(3) |
| N2–C10                  | 1.323(4) | C13–N3–C5  | 106.8(2) |
| N2–C11                  | 1.357(3) | C13–N3–C14 | 126.0(2) |
| N3–C5                   | 1.386(3) | C5–N3–C14  | 127.1(2) |
| N3–C13                  | 1.374(3) | C13–N4–C6  | 105.0(2) |
| N3–C14                  | 1.476(3) | C24–N5–C25 | 115.1(3) |
| N4–C6                   | 1.371(3) | C18–S1–C21 | 92.6(1)  |
| N4–C13                  | 1.327(3) |            |          |
| N5–C24                  | 1.322(4) |            |          |
| N5–C25                  | 1.335(4) |            |          |
| S1–C18                  | 1.725(3) |            |          |
| S1–C21                  | 1.727(3) |            |          |

---

|                                                                                    |          |            |          |
|------------------------------------------------------------------------------------|----------|------------|----------|
| <b>(7)<sub>2</sub>·C<sub>2</sub>H<sub>5</sub>OH·(CHCl<sub>3</sub>)<sub>2</sub></b> |          |            |          |
| N1–C1                                                                              | 1.307(6) | C1–N1–C12  | 118.9(4) |
| N1–C12                                                                             | 1.342(6) | C10–N2–C11 | 117.3(4) |
| N2–C10                                                                             | 1.324(6) | C5–N3–C13  | 106.4(4) |
| N2–C11                                                                             | 1.354(5) | C5–N3–C14  | 128.2(4) |
| N3–C5                                                                              | 1.376(5) | C13–N3–C14 | 124.7(4) |

|                             |          |            |                  |
|-----------------------------|----------|------------|------------------|
| N3-C13                      | 1.386(6) | C13-N4-C6  | 118.3(2)104.4(4) |
| N3-C14                      | 1.484(6) | C28-O2-C29 | 118.2(5)         |
| N4-C6                       | 1.372(5) | C21-S1-C18 | 92.9(2)          |
| N4-C13                      | 1.330(5) |            |                  |
| O1-C28                      | 1.193(6) |            |                  |
| O2-C28                      | 1.341(6) |            |                  |
| O2-C29                      | 1.448(6) |            |                  |
| S1-C18                      | 1.718(5) |            |                  |
| S1-C21                      | 1.708(4) |            |                  |
| <hr/>                       |          |            |                  |
| <b>8 · CHCl<sub>3</sub></b> |          |            |                  |
| N1-C1                       | 1.316(6) | C1-N1-C12  | 118.0(4)         |
| N1-C12                      | 1.344(5) | C10-N2-C11 | 117.0(4)         |
| N2-C10                      | 1.327(6) | C13-N3-C5  | 106.5(3)         |
| N2-C11                      | 1.349(5) | C13-N3-C14 | 125.0(4)         |
| N3-C5                       | 1.393(5) | C5-N3-C14  | 127.1(3)         |
| N3-C13                      | 1.369(5) | C13-N4-C6  | 104.8(3)         |
| N3-C14                      | 1.507(5) | C34-N5-C25 | 117.9(3)         |
| N4-C6                       | 1.374(5) | C34-N5-C28 | 119.0(3)         |
| N4-C13                      | 1.324(5) | C25-N5-C28 | 120.0(3)         |
| N5-C25                      | 1.419(5) | C18-S1-C21 | 93.3(2)          |

|        |          |
|--------|----------|
| N5–C28 | 1.420(5) |
| N5–C34 | 1.418(5) |
| S1–C18 | 1.719(4) |
| S1–C21 | 1.728(4) |

---

**9·CHCl<sub>3</sub>**

|        |          |            |          |
|--------|----------|------------|----------|
| N1–C1  | 1.310(3) | C1–N1–C12  | 117.4(2) |
| N1–C12 | 1.356(3) | C10–N2–C11 | 118.1(2) |
| N2–C10 | 1.310(3) | C13–N3–C6  | 105.9(2) |
| N2–C11 | 1.351(3) | C13–N3–C36 | 126.4(2) |
| N3–C6  | 1.392(3) | C6–N3–C36  | 127.5(2) |
| N3–C13 | 1.376(3) | C13–N4–C5  | 104.6(2) |
| N3–C36 | 1.456(3) | C21–N5–C25 | 108.2(2) |
| N4–C5  | 1.366(3) | C21–N5–C30 | 126.3(2) |
| N4–C13 | 1.310(3) | C25–N5–C30 | 125.4(2) |
| N5–C21 | 1.393(3) | C14–S1–C17 | 92.9(1)  |
| N5–C25 | 1.399(3) |            |          |
| N5–C30 | 1.422(3) |            |          |
| S1–C14 | 1.715(2) |            |          |
| S1–C17 | 1.716(3) |            |          |

---

**10**



|                            |           |             |          |
|----------------------------|-----------|-------------|----------|
| N1-C1                      | 1.312(5)  | C1-N1-C12   | 117.2(3) |
| N1-C12                     | 1.361(4)  | C10-N2-C11  | 118.0(3) |
| N2-C10                     | 1.314(5)  | C13-N3-C5   | 106.3(3) |
| N2-C11                     | 1.341(5)  | C13-N3-C22  | 125.3(3) |
| N3-C5                      | 1.374(4)  | C5-N3-C22   | 128.1(3) |
| N3-C13                     | 1.371(4)  | C13-N4-C6   | 104.9(3) |
| N3-C22                     | 1.481(4)  | C17-S1-C14  | 92.7(2)  |
| N4-C6                      | 1.353(4)  | C18-S2-C21  | 93.2(2)  |
| N4-C13                     | 1.320(4)  |             |          |
| S1-C14                     | 1.729(4)  |             |          |
| S1-C17                     | 1.710(4)  |             |          |
| S2-C18                     | 1.682(4)  |             |          |
| S2-C21                     | 1.687(4)  |             |          |
| <hr/>                      |           |             |          |
| <b>10·CHCl<sub>3</sub></b> |           |             |          |
| S1-C17                     | 1.716(5)  | C14-S1-C17  | 92.8(2)  |
| S1-C14                     | 1.726(5)  | C18-S1'-C20 | 94.4(8)  |
| S1'-C18                    | 1.685(18) | C18-S2-C21  | 94.0(4)  |
| S1'-C20                    | 1.582(18) | C1-N1-C12   | 118.0(4) |
| S2-C18                     | 1.684(8)  | C10-N2-C11  | 117.0(4) |
| S2-C21                     | 1.624(9)  | C5-N3-C22   | 126.3(4) |

|        |          |            |          |
|--------|----------|------------|----------|
| N1-C12 | 1.360(6) | C13-N3-C22 | 126.6(4) |
| N1-C1  | 1.318(6) | C5-N3-C13  | 106.3(3) |
| N2-C11 | 1.355(5) | C6-N4-C13  | 104.7(4) |
| N2-C10 | 1.310(7) |            |          |
| N3-C22 | 1.522(6) |            |          |
| N3-C5  | 1.384(5) |            |          |
| N3-C13 | 1.367(6) |            |          |
| N4-C6  | 1.372(6) |            |          |
| N4-C13 | 1.319(5) |            |          |

---

**11·CHCl<sub>3</sub>**

|        |          |             |          |
|--------|----------|-------------|----------|
| N1-C1  | 1.319(5) | C10-N2-C11  | 117.1(4) |
| N1-C12 | 1.360(5) | C13-N3-C5   | 106.3(3) |
| N2-C10 | 1.310(5) | C13-N3-C22  | 126.6(3) |
| N2-C11 | 1.355(5) | C5-N3-C22   | 126.4(4) |
| N3-C5  | 1.384(5) | C13-N4-C6   | 104.7(3) |
| N3-C13 | 1.367(5) | C17-S1-C14  | 92.8(2)  |
| N3-C22 | 1.522(5) | C21-S2-C18  | 94.0(4)  |
| N4-C6  | 1.372(5) | C20-S1'-C18 | 94.4(6)  |
| N4-C13 | 1.319(5) |             |          |
| S1-C14 | 1.726(4) |             |          |

|         |          |
|---------|----------|
| S1–C17  | 1.716(4) |
| S1'–C18 | 1.685(2) |
| S1'–C20 | 1.582(1) |
| S2–C18  | 1.684(7) |
| S2–C21  | 1.624(9) |

---

**12**

|        |           |            |           |
|--------|-----------|------------|-----------|
| N1–C1  | 1.321(6)  | C1–N1–C12  | 118.5(5)  |
| N1–C12 | 1.343(6)  | C10–N2–C1  | 1117.5(5) |
| N2–C10 | 1.319(7)  | C5–N3–C13  | 105.6(4)  |
| N2–C11 | 1.365(6)  | C5–N3–C23  | 126.5(4)  |
| N3–C5  | 1.379(6)  | C1–N3–C23  | 126.9(4)  |
| N3–C13 | 1.384(6)  | C1–N4–C6   | 104.7(4)  |
| N3–C23 | 1.480(6)  | C21–O1–C18 | 91.6(4)   |
| N4–C6  | 1.371(6)  | C14–S1–C17 | 92.3(3)   |
| N4–C13 | 1.310(6)  |            |           |
| O1–C18 | 1.495(7)  |            |           |
| O1–C21 | 1.451(7)  |            |           |
| O2–C22 | 1.268(11) |            |           |

---

**13·CHCl<sub>3</sub>**

|       |          |           |          |
|-------|----------|-----------|----------|
| N1–C1 | 1.325(4) | C1–N1–C12 | 117.2(2) |
|-------|----------|-----------|----------|

|         |          |            |          |
|---------|----------|------------|----------|
| N1– C12 | 1.352(3) | C10–N2–C11 | 118.0(2) |
| N2 –C10 | 1.318(4) | C1–N3–C5   | 104.9(2) |
| N2–C11  | 1.356(3) | C13–N4–C6  | 105.8(2) |
| N –C5   | 1.360(3) | C13–N4–C30 | 125.5(2) |
| N3–C13  | 1.315(3) | C6–N4–C30  | 128.3(2) |
| N4–C6   | 1.384(3) | C14–S1–C17 | 92.6(1)  |
| N4–C13  | 1.377(3) | C28–S2–C29 | 91.6(1)  |
| N4 –C30 | 1.467(3) |            |          |
| S1–C14  | 1.725(2) |            |          |
| S1– C17 | 1.731(3) |            |          |
| S2–C28  | 1.744(3) |            |          |
| S2–C29  | 1.749(3) |            |          |

---

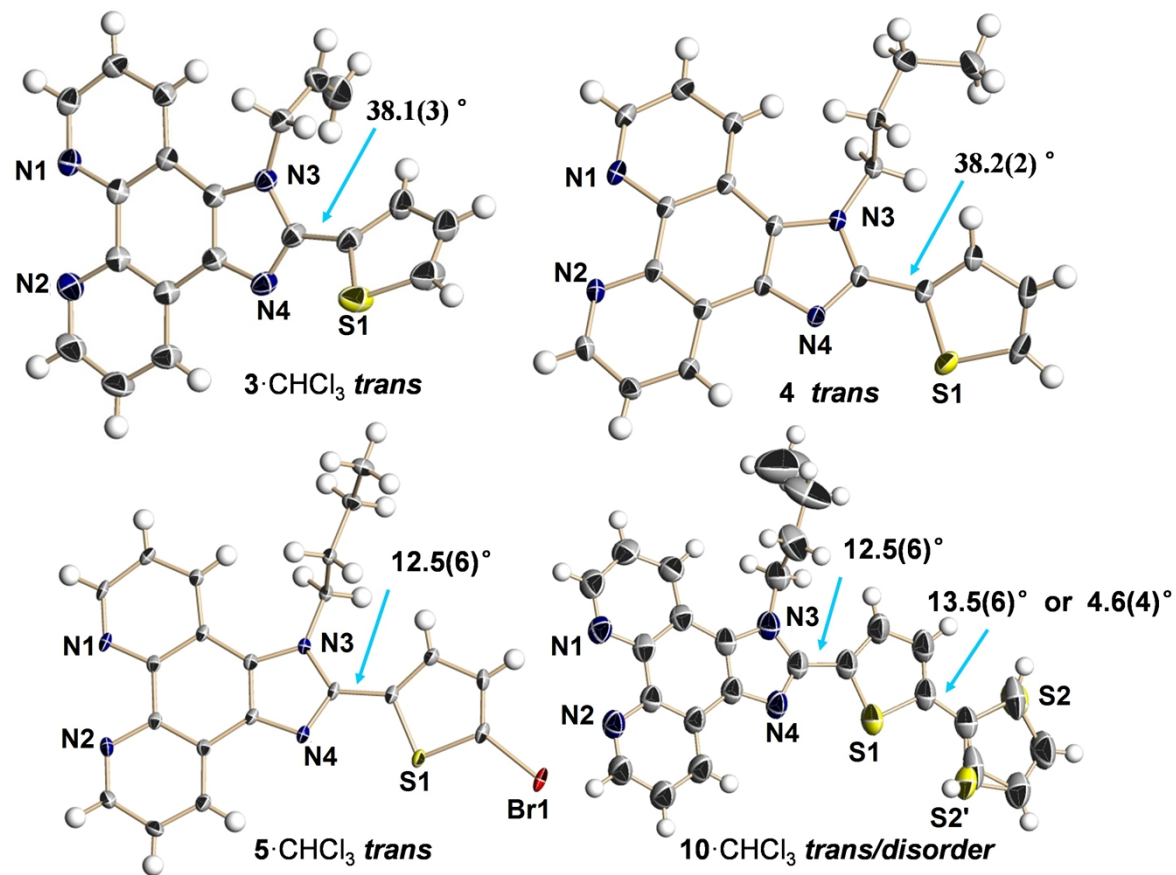

**Fig. S116.** ORTEP diagrams (30 % thermal probability ellipsoids) of the molecular structures of **3·CHCl<sub>3</sub>**, **4**, **5·CHCl<sub>3</sub>** and **10·CHCl<sub>3</sub>** showing the dihedral angles and relative configurations between adjacent aromatic heterocycles. All the solvent molecules are omitted for clarity.

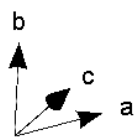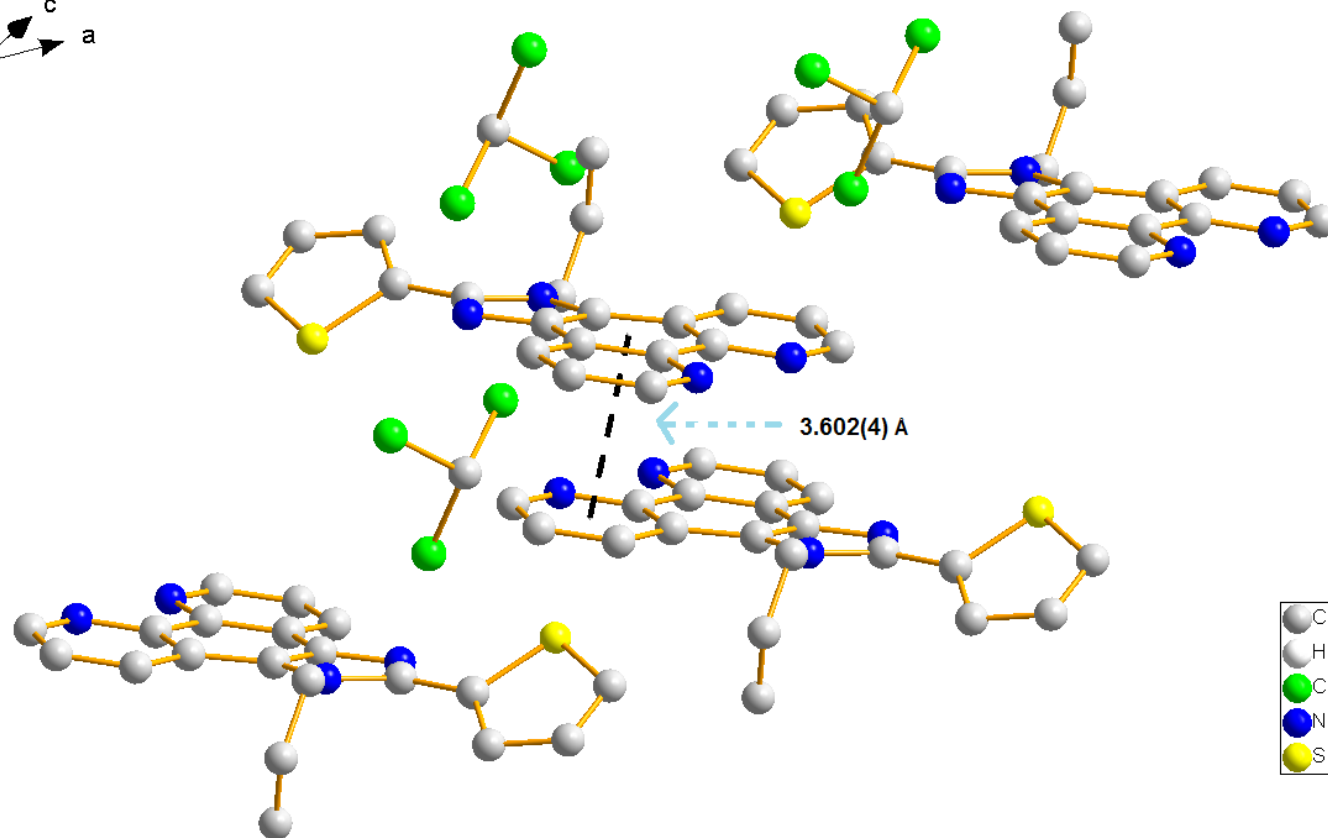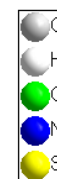

a

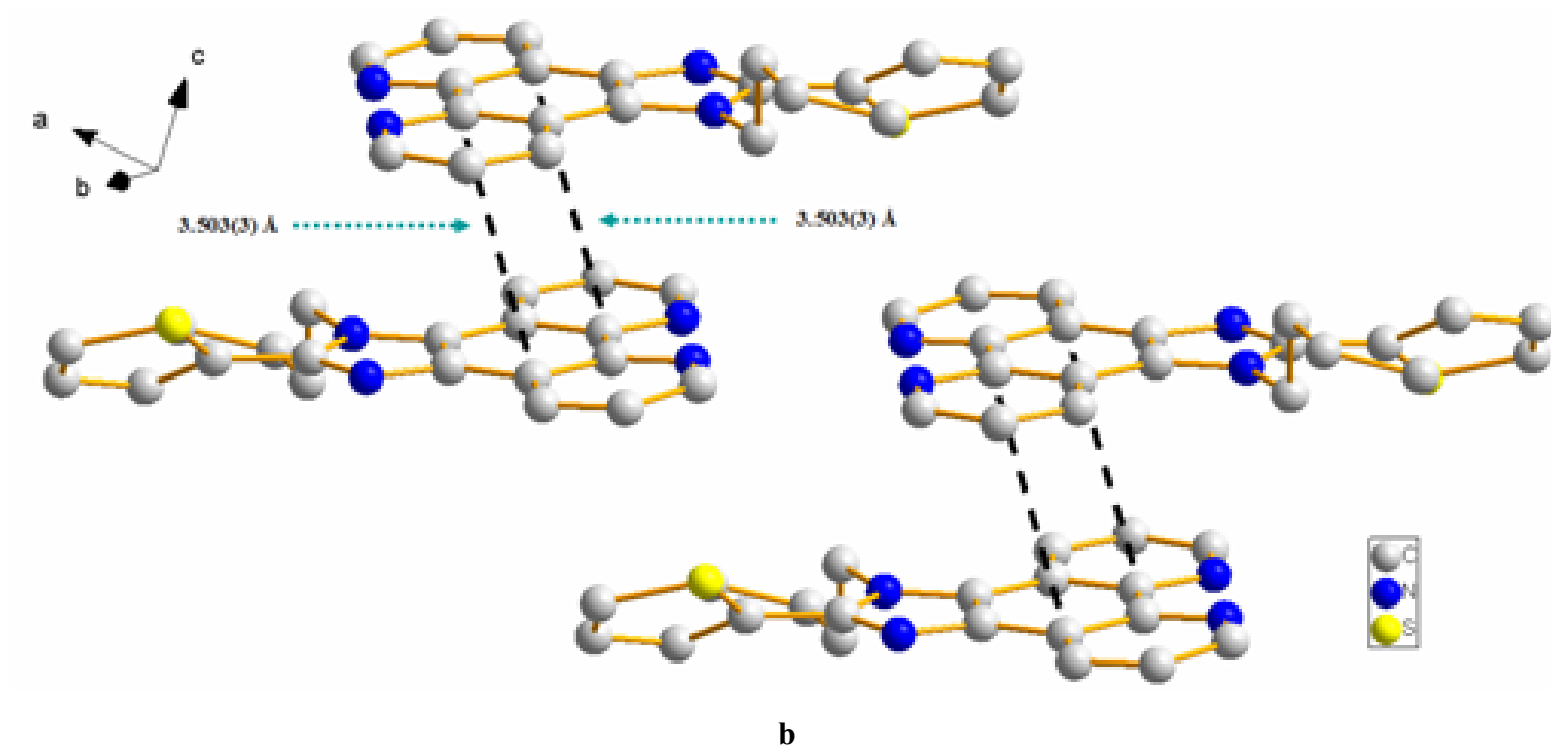

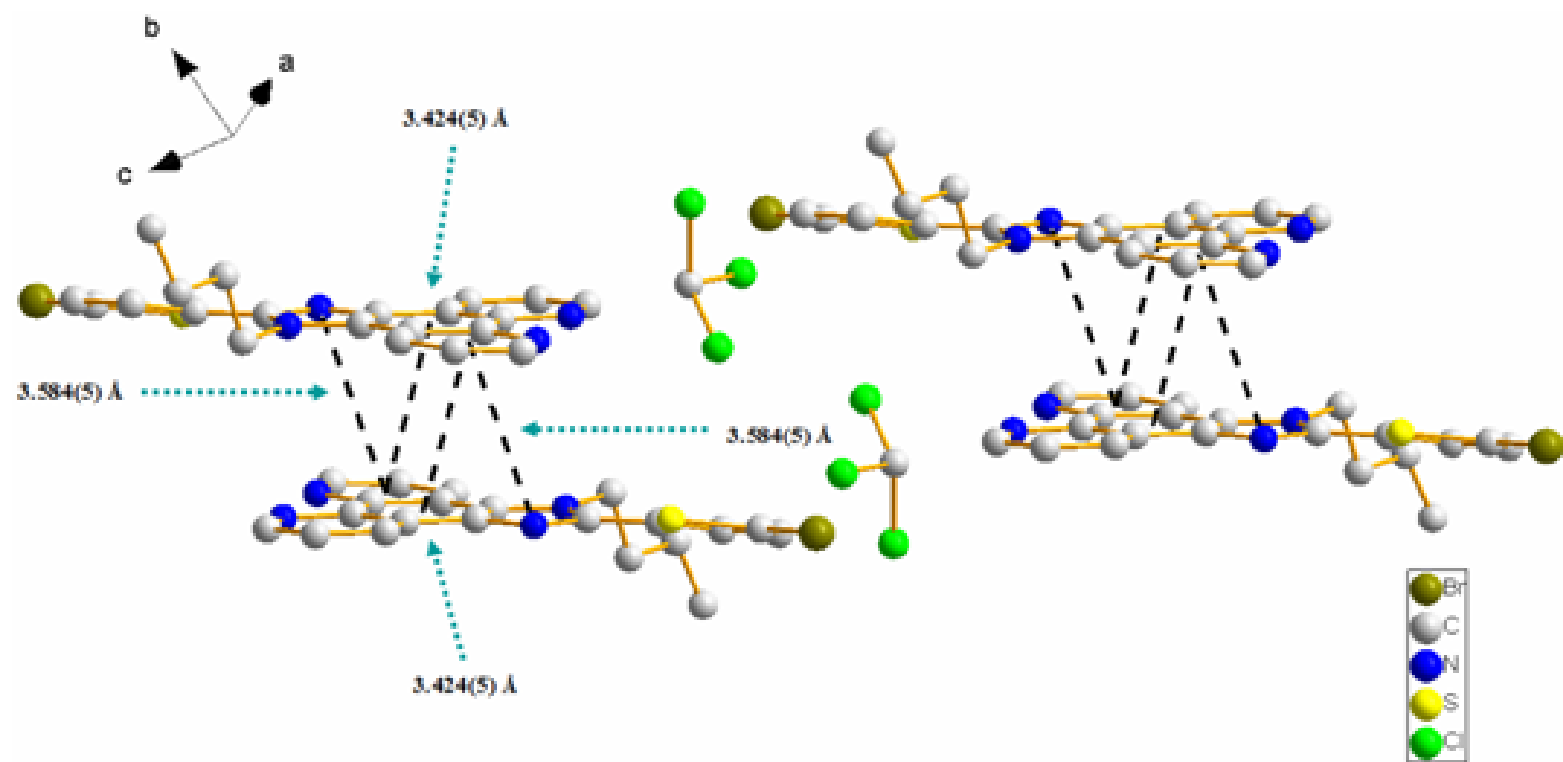

c



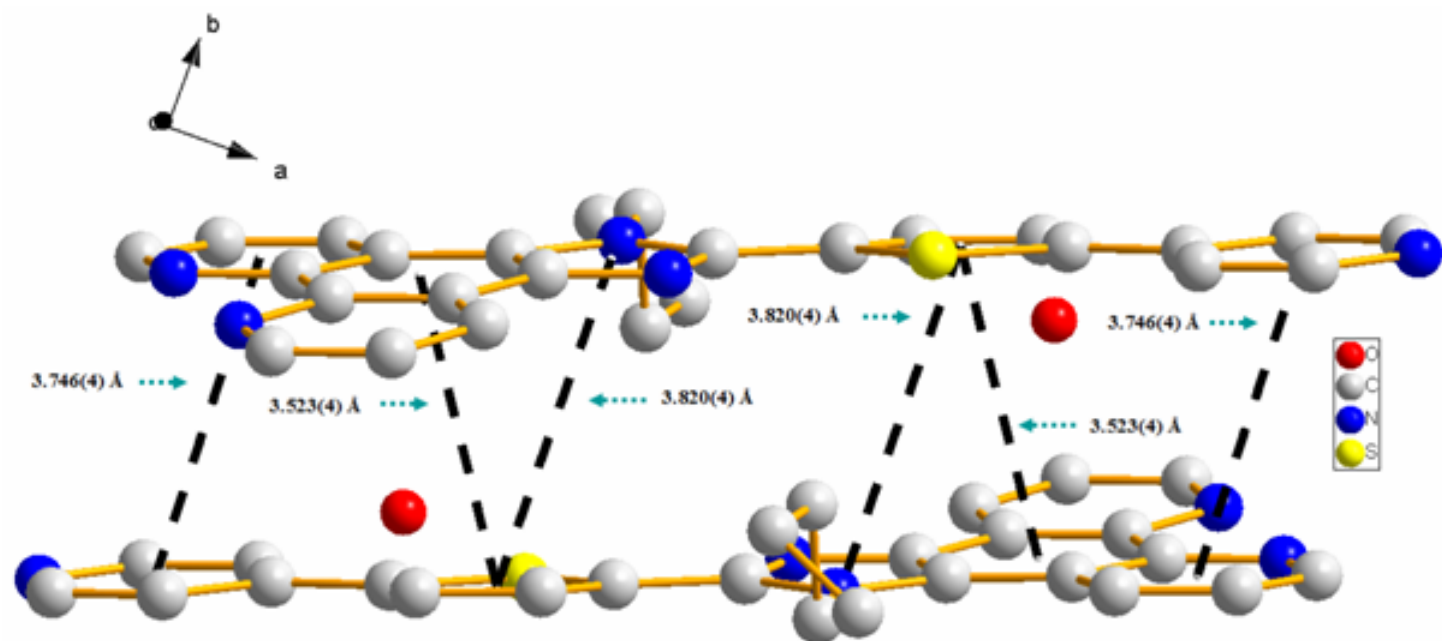

d

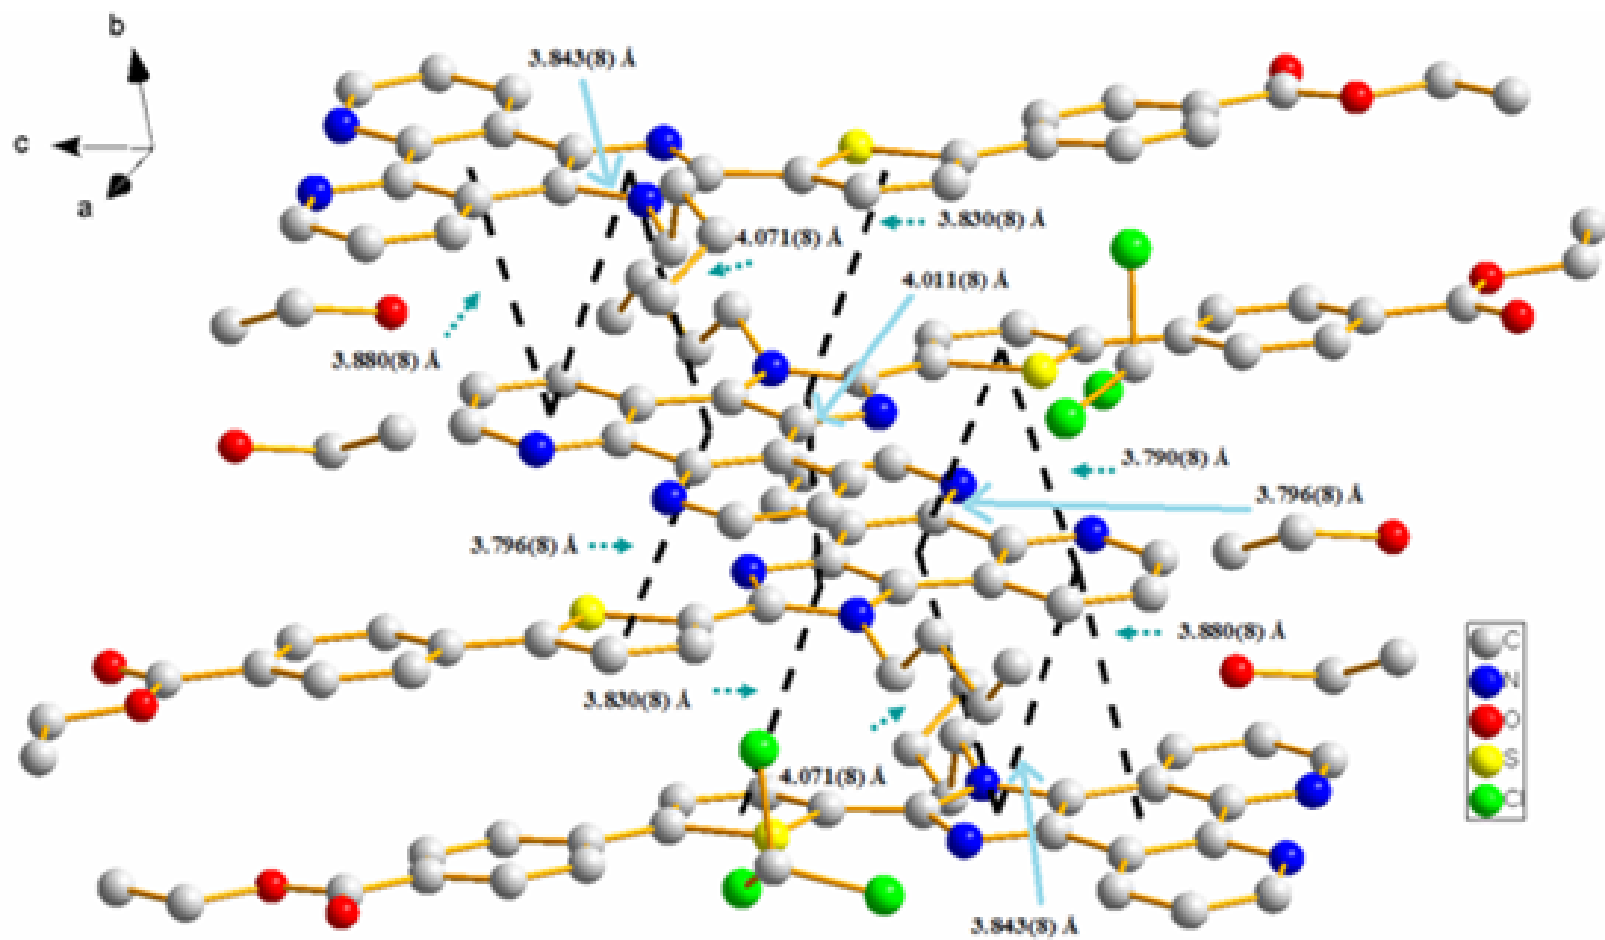

e

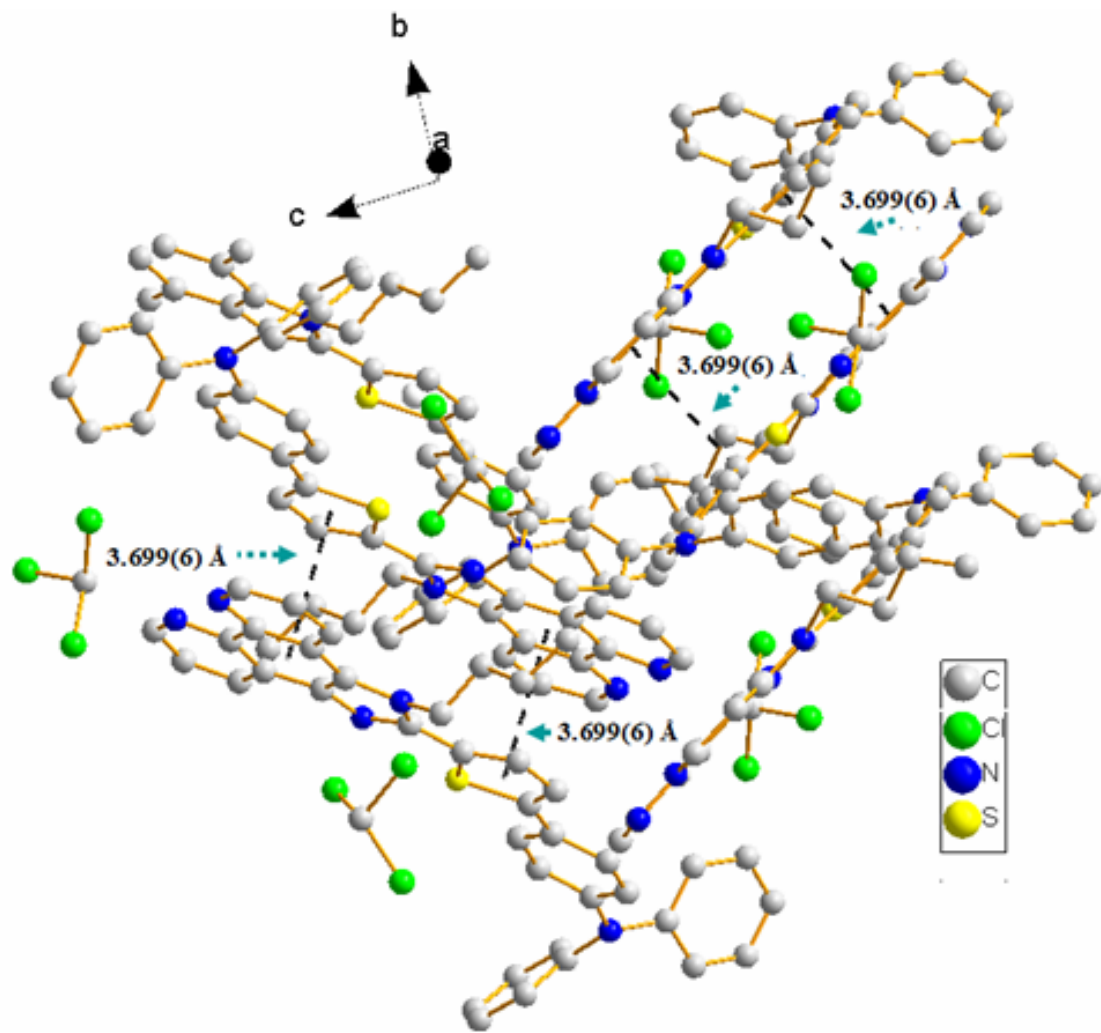

f

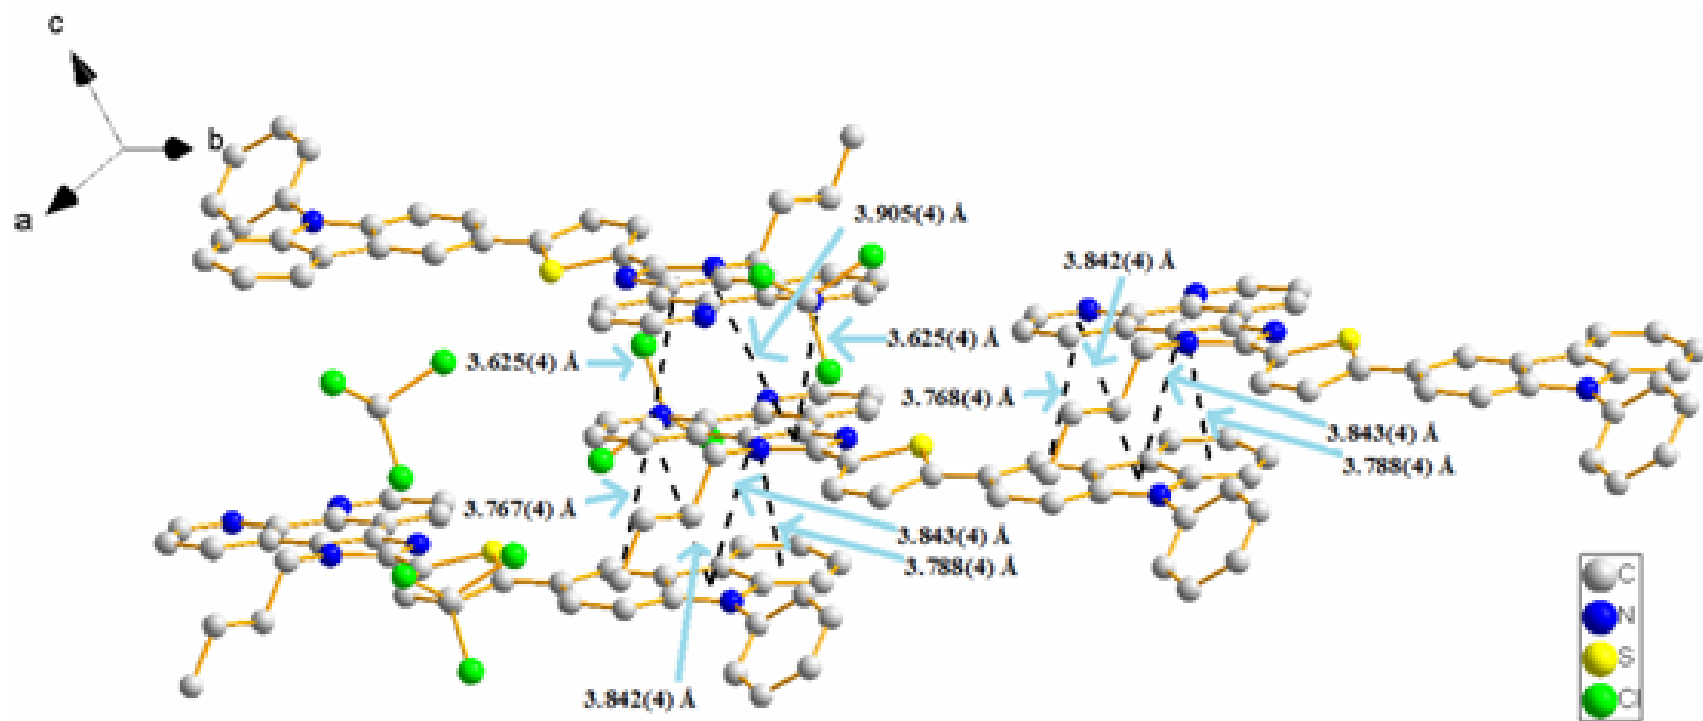

8

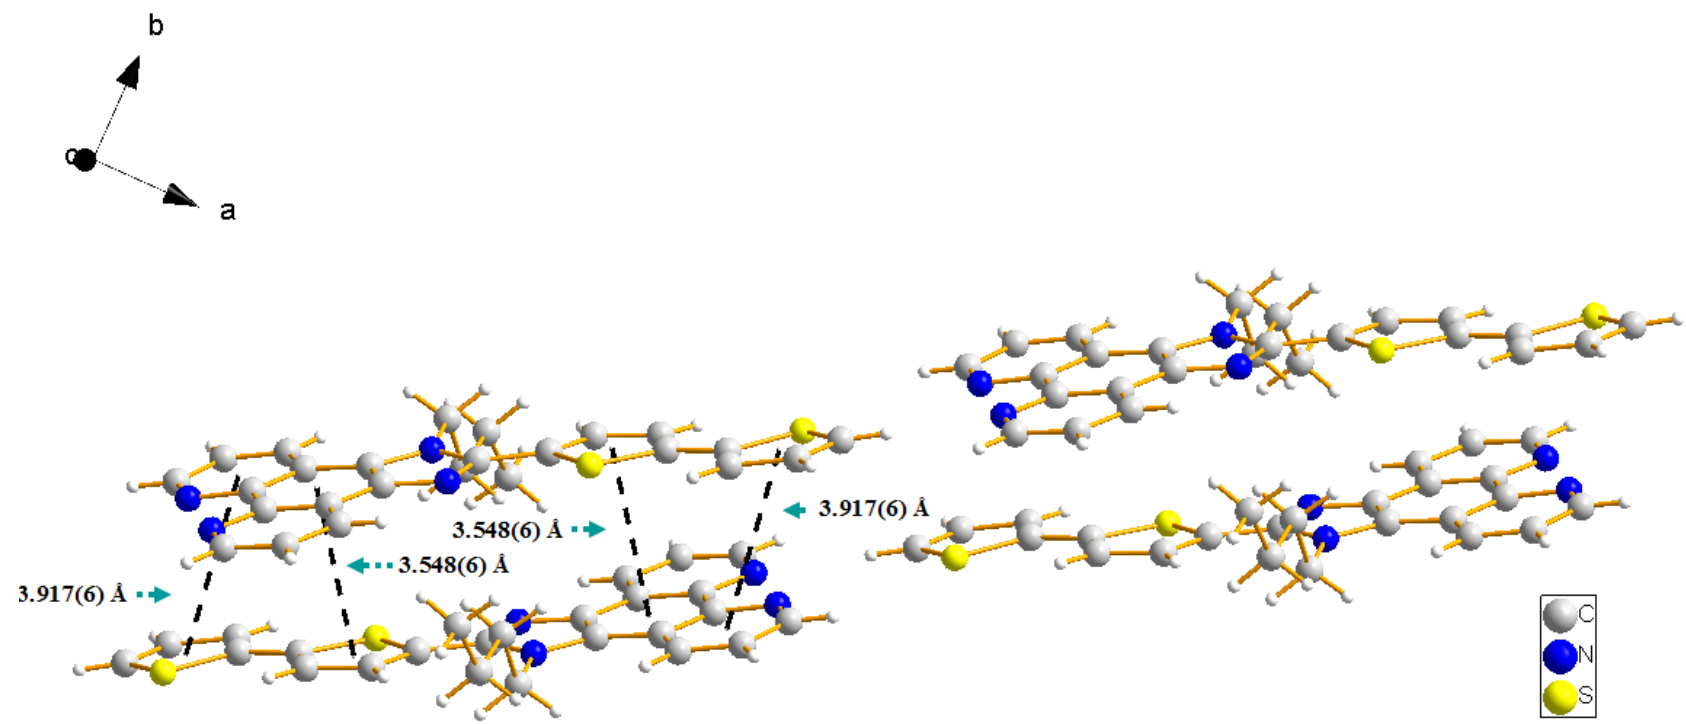

h

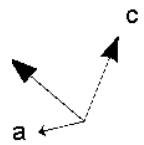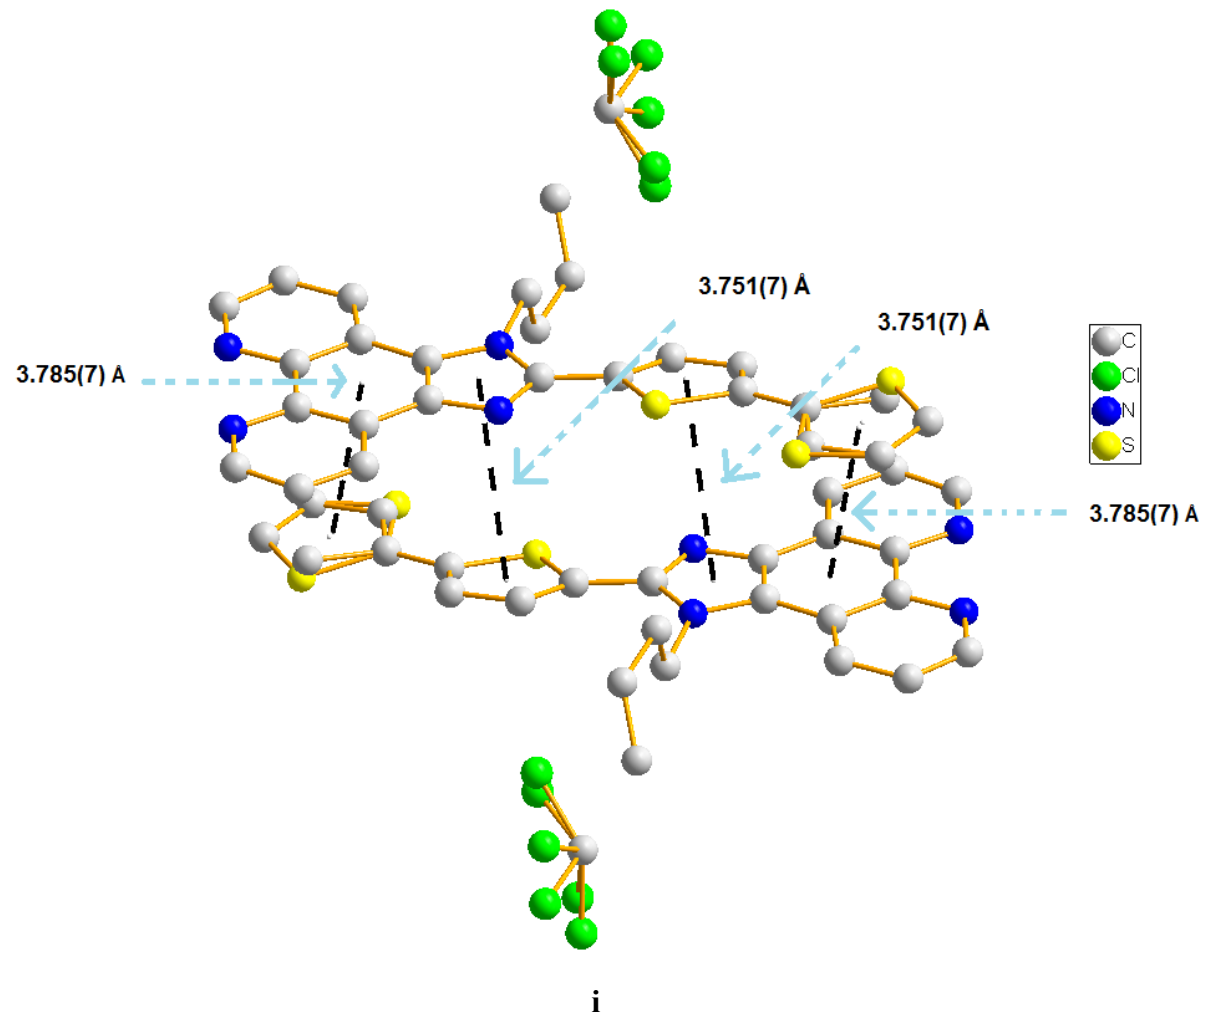

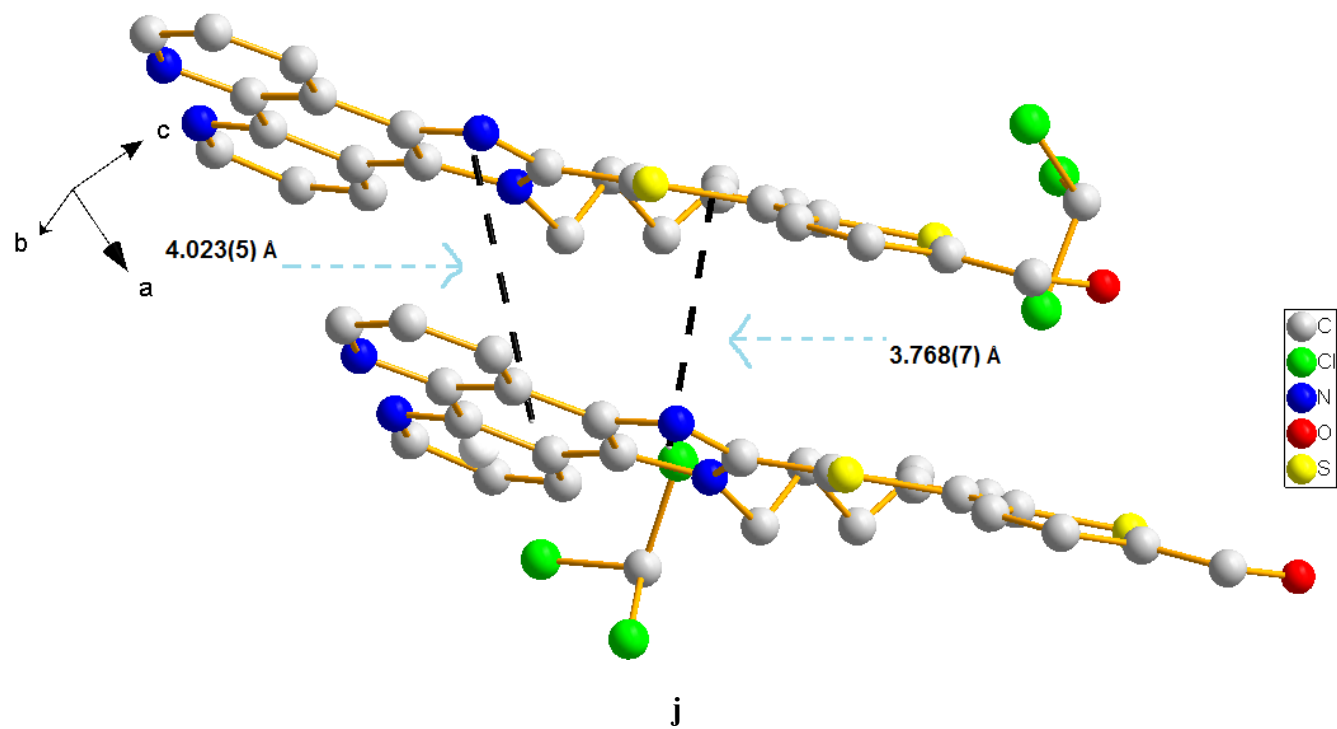

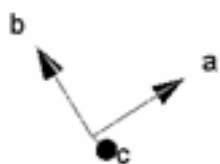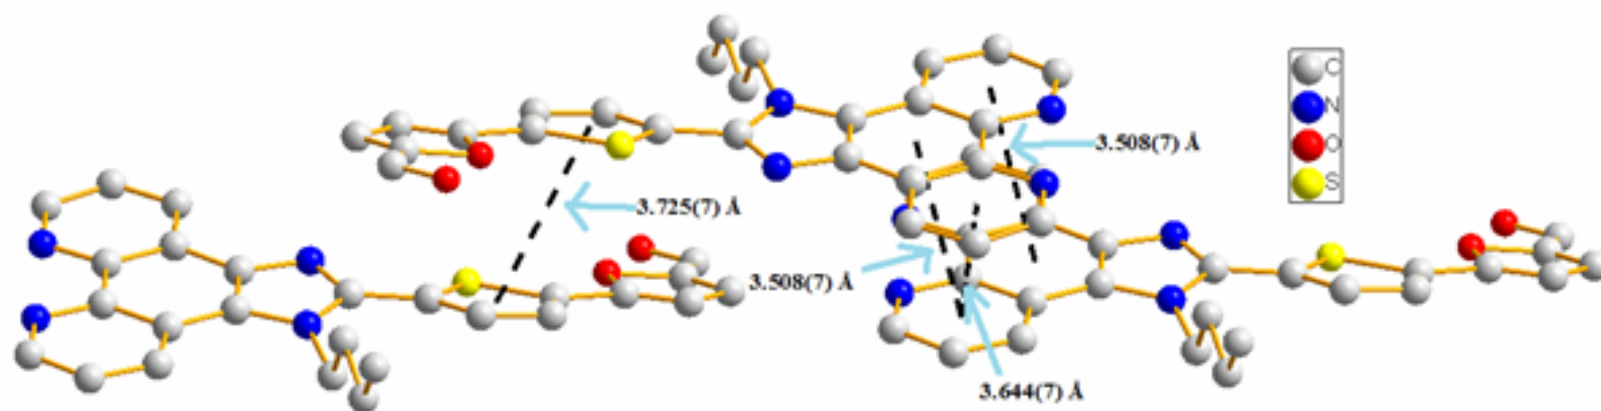

k



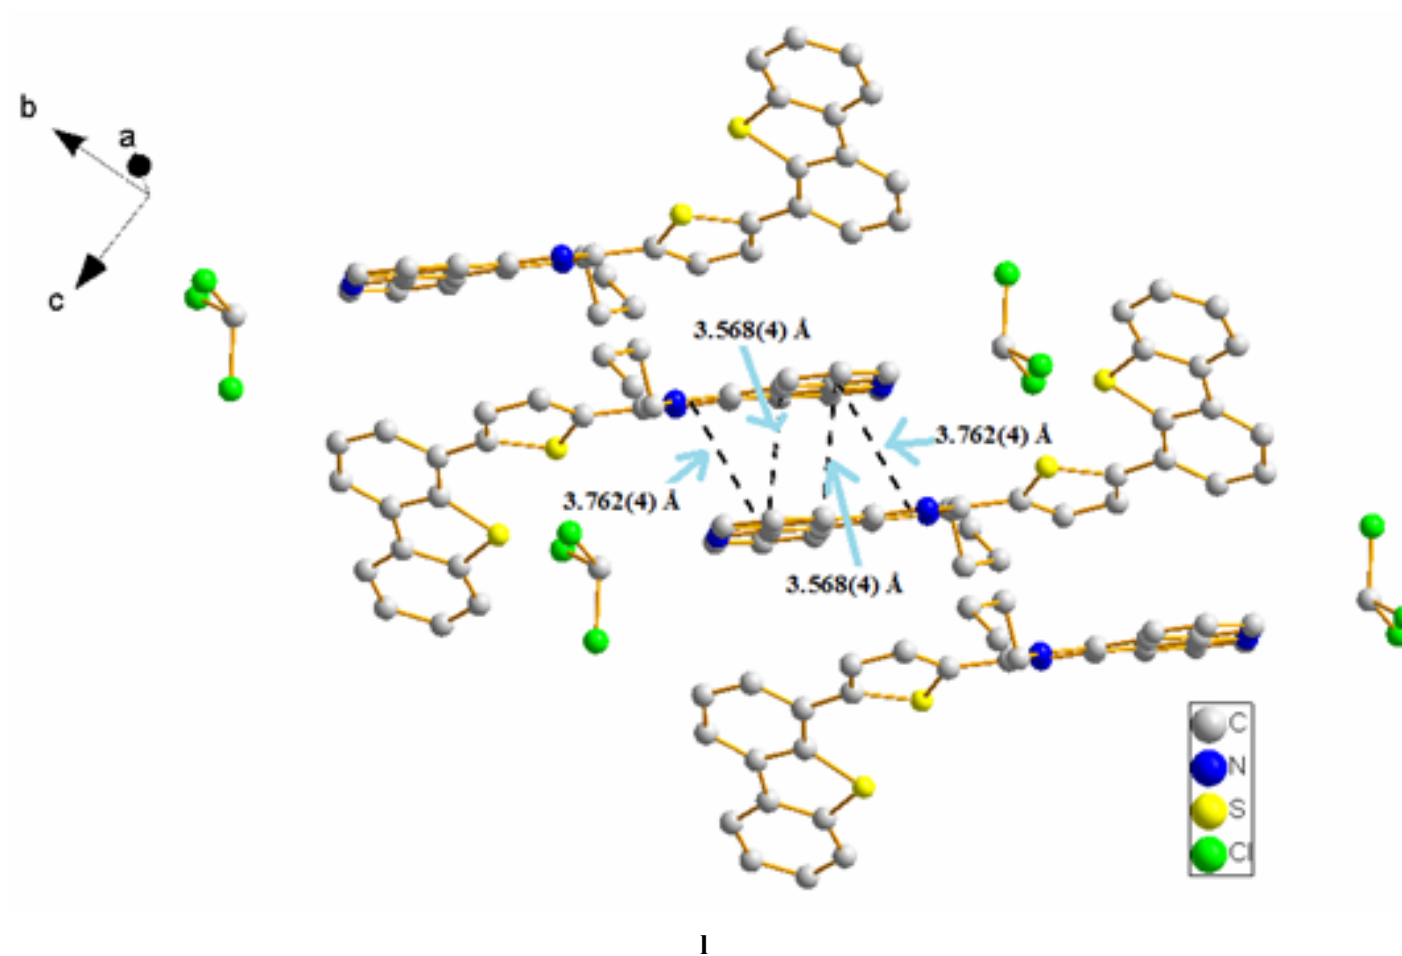

**Fig. S117.** Perspective view of the packing structure in compounds **3**·CHCl<sub>3</sub>, **4**, **5**·CHCl<sub>3</sub>, **6**·H<sub>2</sub>O, (**7**)<sub>2</sub>·C<sub>2</sub>H<sub>5</sub>OH·(CHCl<sub>3</sub>)<sub>2</sub>, **8**·CHCl<sub>3</sub>, **9**·CHCl<sub>3</sub>, **10**·CHCl<sub>3</sub>, **11**·CHCl<sub>3</sub>, **12**, **13**·CHCl<sub>3</sub>.
